# Supplementary material
Source: publisher figshare collection journal article supplement (https://acs.figshare.com/ndownloader/files/7389598)
Supplement: Supplementary file 1 [file 7389598]

data_General
_audit_creation_date                    2016-06-15
_audit_creation_method                 'by CrystalStructure 4.0'
_audit_update_record                    ?

#==============================================================================
# PROCESSING SUMMARY (IUCr Office Use Only)

_journal_date_recd_electronic           ?
_journal_date_from_coeditor             ?
_journal_date_accepted                  ?
_journal_coeditor_code                  ?

#==============================================================================
# SUBMISSION DETAILS

_publ_contact_author_name              'Naohide Matsumoto'
_publ_contact_author_email             'naohide@aster.sc.kumamoto-u.ac.jp'
_publ_contact_author_fax               '+81-96-342-3390'
_publ_contact_author_phone             '+81-96-342-3390'
_publ_contact_letter
;
    ENTER TEXT OF LETTER
;
_publ_requested_journal                'Inorganic Chemistry'
_publ_requested_category               'CHOOSE FI FM FO CI CM CO or AD'
_publ_requested_coeditor_name           ?

#==============================================================================
# TITLE AND AUTHOR LIST

_publ_section_title
;
    ENTER SECTION TITLE
;
_publ_section_title_footnote
;
    ENTER FOOTNOTE TO TITLE OF PAPER
;
loop_
_publ_author_name
_publ_author_footnote
_publ_author_address
' Takahiro Ueno '
;
  Kumamoto University
;
;
  Kurokami 2-39-1, Kumamoto 860-8555, Japan
;
_publ_section_synopsis
;
    ENTER SYNOPSIS
;

#==============================================================================
# TEXT

_publ_section_abstract
;
    ENTER ABSTRACT
;
_publ_section_comment
;
    ENTER TEXT
;
_publ_section_references
;
    ENTER OTHER REFERENCES

    Rigaku (2010). CrystalStructure. Version 4.0. 
    Rigaku Corporation, Tokyo, Japan.

    Sheldrick, G.M. (2008).
    Acta Cryst. A64, 112-122.
    SHELX97

    Carruthers, J.R., Rollett,J.S., Betteridge, P.W.,
	 Kinna, D., Pearce, L., Larsen, A., and Gabe, E.(1999)
    CRYSTALS Issue 11, Chemical Crystallography Laboratory, Oxford, UK.

    Carruthers, J.R. and Watkin, D.J. (1979), Acta Cryst, A35, 698-699

    Rigaku (1999). NUMABS. 
    Rigaku Corporation, Tokyo, Japan.

;
_publ_section_figure_captions
;
    ENTER FIGURE CAPTIONS
;
_publ_section_exptl_prep
;
    ENTER COMPOUND PREPARATION DETAILS
;
_publ_section_exptl_refinement
;
    ENTER SPECIAL DETAILS OF THE REFINEMENT
;

#==============================================================================
data_CuGd(RR)-120K

#==============================================================================
# CHEMICAL DATA

_chemical_formula_sum                  'C34 H31 Cu Gd N6 O10'
_chemical_formula_moiety               'C34 H31 Cu Gd N6 O10'
_chemical_formula_weight                904.45
_chemical_melting_point                 ?
_chemical_absolute_configuration       'CHOOSE rm ad rmad syn or unk'

#==============================================================================
# CRYSTAL DATA
_symmetry_cell_setting                  orthorhombic
_symmetry_space_group_name_H-M         'P 21 21 21'
_symmetry_space_group_name_Hall        'P 2ac 2ab'
_symmetry_Int_Tables_number             19
loop_
_symmetry_equiv_pos_site_id
_symmetry_equiv_pos_as_xyz
1   '+X,+Y,+Z'
2   '1/2+X,1/2-Y,-Z'
3   '-X,1/2+Y,1/2-Z'
4   '1/2-X,-Y,1/2+Z'
#------------------------------------------------------------------------------
_cell_length_a                          13.4892(4)
_cell_length_b                          15.7803(4)
_cell_length_c                          15.8966(5)
_cell_angle_alpha                       90.0000
_cell_angle_beta                        90.0000
_cell_angle_gamma                       90.0000
_cell_volume                            3383.79(16)
_cell_formula_units_Z                   4
_cell_measurement_reflns_used           23858
_cell_measurement_theta_min             2.99
_cell_measurement_theta_max             27.46
_cell_measurement_temperature           120
#------------------------------------------------------------------------------
_exptl_crystal_description              block
_exptl_crystal_colour                   red
_exptl_crystal_size_max                 0.362
_exptl_crystal_size_mid                 0.156
_exptl_crystal_size_min                 0.124
_exptl_crystal_density_diffrn           1.775
_exptl_crystal_density_meas             ?
_exptl_crystal_density_method          'not measured'
_exptl_crystal_F_000                    1800.00
_exptl_absorpt_coefficient_mu           2.645
_exptl_absorpt_correction_type          numerical
_exptl_absorpt_process_details         'NUMABS (Rigaku, 1999)'
_exptl_absorpt_correction_T_min         0.625
_exptl_absorpt_correction_T_max         0.720

#==============================================================================
# EXPERIMENTAL DATA

_diffrn_ambient_temperature             120
_diffrn_radiation_type                 'Mo K\a'
_diffrn_radiation_wavelength            0.71075
_diffrn_measurement_device_type        'Rigaku R-AXIS RAPID'
_diffrn_measurement_method              \w
_diffrn_detector_area_resol_mean        10.000
_diffrn_reflns_number                   32777
_diffrn_reflns_av_R_equivalents         0.0897
_diffrn_reflns_theta_max                27.46
_diffrn_reflns_theta_full               27.46
_diffrn_measured_fraction_theta_max     0.997
_diffrn_measured_fraction_theta_full    0.997
_diffrn_reflns_limit_h_min             -17
_diffrn_reflns_limit_h_max              17
_diffrn_reflns_limit_k_min             -20
_diffrn_reflns_limit_k_max              20
_diffrn_reflns_limit_l_min             -20
_diffrn_reflns_limit_l_max              20
_diffrn_standards_number                0
_diffrn_standards_interval_count        .
_diffrn_standards_decay_%               ?

#==============================================================================
# REFINEMENT DATA

_refine_special_details
;
    Refinement was performed using reflections with F^2^ > 2.1 sigma(F^2^).
    The weighted     R-factor (wR) and goodness of fit (S) are based on F^2^.
    R-factor (gt) are based on F. The threshold expression of
    F^2^ > 2.1 sigma(F^2^) is used only for calculating R-factor (gt).
;
_reflns_number_total                    7711
_reflns_number_gt                       6112
_reflns_threshold_expression            F^2^>2.1\s(F^2^)
_refine_ls_structure_factor_coef        Fsqd
_refine_ls_R_factor_gt                  0.0418
_refine_ls_wR_factor_ref                0.0809
_refine_ls_number_restraints            ?
_refine_ls_hydrogen_treatment           constr
_refine_ls_number_reflns                6112
_refine_ls_number_parameters            501
_refine_ls_goodness_of_fit_ref          0.952
_refine_ls_weighting_scheme             calc
_refine_ls_weighting_details
;
    Chebychev polynomial with 3 parameters (Carruthers & Watkin, 1979)
    1526.1800    2142.8500    701.1150
;
_atom_sites_solution_hydrogens          geom
_atom_sites_solution_primary            direct
_atom_sites_solution_secondary          difmap
_refine_ls_shift/su_max                 0.000
_refine_diff_density_max                2.100
_refine_diff_density_min               -2.990
_refine_ls_extinction_method            none
_refine_ls_extinction_coef              ?
_refine_ls_abs_structure_details
           'Flack, H. D. (1983), Acta Cryst. A39, 876-881.  3424 Friedel Pairs'
_refine_ls_abs_structure_Flack          0.025(15)

loop_
_atom_type_symbol
_atom_type_description
_atom_type_scat_dispersion_real
_atom_type_scat_dispersion_imag
_atom_type_scat_source
  'O' 'O'  0.0106 0.0060 
;
International Tables for Crystallography
(1992, Vol. C, Tables 4.2.6.8 and 6.1.1.4)
;
  'Cu' 'Cu'  0.3201 1.2651 
;
International Tables for Crystallography
(1992, Vol. C, Tables 4.2.6.8 and 6.1.1.4)
;
  'Gd' 'Gd'  -0.1653 3.9035 
;
International Tables for Crystallography
(1992, Vol. C, Tables 4.2.6.8 and 6.1.1.4)
;
  'C' 'C'  0.0033 0.0016 
;
International Tables for Crystallography
(1992, Vol. C, Tables 4.2.6.8 and 6.1.1.4)
;
  'H' 'H'  0.0000 0.0000 
;
International Tables for Crystallography
(1992, Vol. C, Table 6.1.1.4)
;
  'N' 'N'  0.0061 0.0033 
;
International Tables for Crystallography
(1992, Vol. C, Tables 4.2.6.8 and 6.1.1.4)
;

#==============================================================================
# ATOMIC COORDINATES AND THERMAL PARAMETERS

loop_
_atom_site_label
_atom_site_type_symbol
_atom_site_fract_x
_atom_site_fract_y
_atom_site_fract_z
_atom_site_U_iso_or_equiv
_atom_site_adp_type
_atom_site_occupancy
_atom_site_symmetry_multiplicity
_atom_site_calc_flag
_atom_site_refinement_flags
_atom_site_disorder_assembly
_atom_site_disorder_group
 Gd1 Gd 0.52861(2) 0.59533(2) 0.13147(2) 0.01876(7) Uani 1.0 4 d . . .
 Cu1 Cu 0.62871(6) 0.74133(5) 0.25712(5) 0.0205(2) Uani 1.0 4 d . . .
 O1 O 0.5493(4) 0.7467(3) 0.1575(3) 0.0247(12) Uani 1.0 4 d . . .
 O2 O 0.6624(4) 0.6304(3) 0.2158(3) 0.0212(12) Uani 1.0 4 d . . .
 O3 O 0.5149(4) 0.9746(3) 0.3060(3) 0.0224(12) Uani 1.0 4 d . . .
 O4 O 0.6924(4) 0.5000(3) 0.1246(4) 0.0226(12) Uani 1.0 4 d . . .
 O5 O 0.4627(4) 0.6345(3) 0.2756(3) 0.0246(12) Uani 1.0 4 d . . .
 O6 O 0.3648(4) 0.6442(3) 0.1687(3) 0.0258(13) Uani 1.0 4 d . . .
 O7 O 0.3091(5) 0.6746(4) 0.2941(4) 0.0437(18) Uani 1.0 4 d . . .
 O8 O 0.4223(4) 0.6142(3) 0.0089(4) 0.0308(14) Uani 1.0 4 d . . .
 O9 O 0.5060(4) 0.4970(3) 0.0110(3) 0.0290(13) Uani 1.0 4 d . . .
 O10 O 0.4033(4) 0.5225(4) -0.0939(4) 0.0348(15) Uani 1.0 4 d . . .
 N1 N 0.6007(4) 0.8514(4) 0.2992(4) 0.0188(14) Uani 1.0 4 d . . .
 N2 N 0.7144(4) 0.7297(4) 0.3533(4) 0.0209(14) Uani 1.0 4 d . . .
 N3 N 0.3764(5) 0.6514(4) 0.2488(4) 0.0276(16) Uani 1.0 4 d . . .
 N4 N 0.4426(5) 0.5434(4) -0.0270(4) 0.0270(16) Uani 1.0 4 d . . .
 N5 N 0.6343(5) 0.6474(4) 0.0073(4) 0.0296(17) Uani 1.0 4 d . . .
 N6 N 0.9569(8) 0.7678(6) 0.1785(5) 0.064(3) Uani 1.0 4 d . . .
 C1 C 0.5022(5) 0.8169(4) 0.1330(5) 0.0210(15) Uani 1.0 4 d . . .
 C2 C 0.4606(6) 0.8166(4) 0.0515(5) 0.0235(17) Uani 1.0 4 d . . .
 C3 C 0.4093(5) 0.8857(4) 0.0203(5) 0.0264(18) Uani 1.0 4 d . . .
 C4 C 0.3968(6) 0.9573(5) 0.0699(5) 0.029(2) Uani 1.0 4 d . . .
 C5 C 0.4376(5) 0.9590(4) 0.1493(5) 0.0245(17) Uani 1.0 4 d . . .
 C6 C 0.4924(5) 0.8911(4) 0.1825(4) 0.0199(16) Uani 1.0 4 d . . .
 C7 C 0.5375(5) 0.9050(4) 0.2671(4) 0.0182(13) Uani 1.0 4 d . . .
 C8 C 0.6519(5) 0.8741(4) 0.3786(5) 0.0185(15) Uani 1.0 4 d . . .
 C9 C 0.7321(5) 0.9412(4) 0.3676(5) 0.0197(15) Uani 1.0 4 d . . .
 C10 C 0.7693(6) 0.9671(5) 0.2917(5) 0.0265(19) Uani 1.0 4 d . . .
 C11 C 0.8440(6) 1.0270(5) 0.2870(6) 0.032(2) Uani 1.0 4 d . . .
 C12 C 0.8823(6) 1.0629(5) 0.3598(6) 0.035(2) Uani 1.0 4 d . . .
 C13 C 0.8457(6) 1.0387(5) 0.4367(5) 0.0264(19) Uani 1.0 4 d . . .
 C14 C 0.7707(6) 0.9786(5) 0.4410(5) 0.0265(19) Uani 1.0 4 d . . .
 C15 C 0.6926(5) 0.7910(4) 0.4198(5) 0.0214(17) Uani 1.0 4 d . . .
 C16 C 0.6215(5) 0.7542(5) 0.4839(4) 0.0210(16) Uani 1.0 4 d . . .
 C17 C 0.5537(6) 0.6916(5) 0.4648(5) 0.029(2) Uani 1.0 4 d . . .
 C18 C 0.4892(6) 0.6611(5) 0.5259(6) 0.038(3) Uani 1.0 4 d . . .
 C19 C 0.4919(6) 0.6933(5) 0.6056(5) 0.037(3) Uani 1.0 4 d . . .
 C20 C 0.5579(5) 0.7566(5) 0.6257(5) 0.0307(18) Uani 1.0 4 d . . .
 C21 C 0.6230(6) 0.7873(5) 0.5647(5) 0.0297(19) Uani 1.0 4 d . . .
 C22 C 0.7861(5) 0.6757(4) 0.3609(5) 0.0192(15) Uani 1.0 4 d . . .
 C23 C 0.8051(5) 0.6056(4) 0.3052(4) 0.0202(16) Uani 1.0 4 d . . .
 C24 C 0.8871(6) 0.5534(5) 0.3206(5) 0.0271(19) Uani 1.0 4 d . . .
 C25 C 0.9048(6) 0.4827(5) 0.2724(5) 0.032(2) Uani 1.0 4 d . . .
 C26 C 0.8422(6) 0.4617(5) 0.2052(5) 0.0278(19) Uani 1.0 4 d . . .
 C27 C 0.7609(6) 0.5124(5) 0.1892(5) 0.0253(19) Uani 1.0 4 d . . .
 C28 C 0.7422(5) 0.5855(4) 0.2366(4) 0.0194(15) Uani 1.0 4 d . . .
 C29 C 0.7070(5) 0.4284(4) 0.0698(5) 0.0251(18) Uani 1.0 4 d . . .
 C30 C 0.6606(6) 0.3490(5) 0.1049(6) 0.034(3) Uani 1.0 4 d . . .
 C31 C 0.6659(6) 0.6713(5) -0.0558(5) 0.027(2) Uani 1.0 4 d . . .
 C32 C 0.7050(6) 0.7031(5) -0.1343(6) 0.036(2) Uani 1.0 4 d . . .
 C33 C 0.8807(8) 0.7782(6) 0.1481(6) 0.047(3) Uani 1.0 4 d . . .
 C34 C 0.7856(7) 0.7924(6) 0.1091(7) 0.051(3) Uani 1.0 4 d . . .
 H1 H 0.4686 0.7686 0.0182 0.0282 Uiso 1.0 4 calc R . .
 H2 H 0.3826 0.8837 -0.0336 0.0316 Uiso 1.0 4 calc R . .
 H3 H 0.3626 1.0040 0.0493 0.0352 Uiso 1.0 4 calc R . .
 H4 H 0.4281 1.0067 0.1826 0.0294 Uiso 1.0 4 calc R . .
 H5 H 0.6020 0.8976 0.4169 0.0221 Uiso 1.0 4 calc R . .
 H6 H 0.7433 0.9441 0.2425 0.0317 Uiso 1.0 4 calc R . .
 H7 H 0.8681 1.0438 0.2348 0.0386 Uiso 1.0 4 calc R . .
 H8 H 0.9332 1.1026 0.3566 0.0416 Uiso 1.0 4 calc R . .
 H9 H 0.8710 1.0625 0.4857 0.0317 Uiso 1.0 4 calc R . .
 H10 H 0.7453 0.9631 0.4931 0.0319 Uiso 1.0 4 calc R . .
 H11 H 0.7549 0.8048 0.4484 0.0257 Uiso 1.0 4 calc R . .
 H12 H 0.5508 0.6697 0.4105 0.0351 Uiso 1.0 4 calc R . .
 H13 H 0.4443 0.6184 0.5125 0.0460 Uiso 1.0 4 calc R . .
 H14 H 0.4486 0.6726 0.6463 0.0438 Uiso 1.0 4 calc R . .
 H15 H 0.5592 0.7787 0.6800 0.0368 Uiso 1.0 4 calc R . .
 H16 H 0.6671 0.8305 0.5782 0.0356 Uiso 1.0 4 calc R . .
 H17 H 0.8294 0.6832 0.4058 0.0230 Uiso 1.0 4 calc R . .
 H18 H 0.9299 0.5669 0.3645 0.0325 Uiso 1.0 4 calc R . .
 H19 H 0.9592 0.4485 0.2846 0.0380 Uiso 1.0 4 calc R . .
 H20 H 0.8555 0.4147 0.1718 0.0333 Uiso 1.0 4 calc R . .
 H21 H 0.7778 0.4216 0.0620 0.0300 Uiso 1.0 4 calc R . .
 H22 H 0.6766 0.4431 0.0164 0.0301 Uiso 1.0 4 calc R . .
 H23 H 0.5908 0.3576 0.1129 0.0408 Uiso 1.0 4 calc R . .
 H24 H 0.6709 0.3026 0.0668 0.0407 Uiso 1.0 4 calc R . .
 H25 H 0.6910 0.3363 0.1580 0.0408 Uiso 1.0 4 calc R . .
 H26 H 0.7423 0.7539 -0.1240 0.0432 Uiso 1.0 4 calc R . .
 H27 H 0.7476 0.6611 -0.1590 0.0432 Uiso 1.0 4 calc R . .
 H28 H 0.6515 0.7154 -0.1722 0.0432 Uiso 1.0 4 calc R . .
 H29 H 0.7886 0.7766 0.0508 0.0618 Uiso 1.0 4 calc R . .
 H30 H 0.7361 0.7589 0.1370 0.0618 Uiso 1.0 4 calc R . .
 H31 H 0.7687 0.8513 0.1136 0.0618 Uiso 1.0 4 calc R . .


loop_
_atom_site_aniso_label
_atom_site_aniso_U_11
_atom_site_aniso_U_22
_atom_site_aniso_U_33
_atom_site_aniso_U_12
_atom_site_aniso_U_13
_atom_site_aniso_U_23
 Gd1 0.02237(14) 0.01445(12) 0.01945(14) -0.00068(13) -0.00035(14) 0.00005(13)
 Cu1 0.0235(4) 0.0158(4) 0.0221(5) 0.0031(4) -0.0031(4) -0.0012(3)
 O1 0.034(3) 0.014(2) 0.026(3) 0.003(2) 0.002(2) -0.0001(18)
 O2 0.018(3) 0.016(2) 0.029(3) 0.0095(18) -0.006(2) 0.000(2)
 O3 0.023(3) 0.016(2) 0.028(3) 0.0057(19) -0.002(2) 0.0037(18)
 O4 0.030(3) 0.015(2) 0.023(3) 0.0030(18) -0.002(3) -0.005(2)
 O5 0.026(3) 0.023(2) 0.025(3) 0.007(3) 0.002(3) -0.0012(19)
 O6 0.022(3) 0.024(3) 0.031(3) 0.005(2) 0.001(3) -0.001(2)
 O7 0.035(4) 0.047(4) 0.049(4) -0.003(3) 0.016(3) -0.014(3)
 O8 0.033(3) 0.029(3) 0.031(3) 0.002(3) -0.006(3) -0.005(3)
 O9 0.037(3) 0.025(3) 0.025(3) -0.000(2) -0.003(3) 0.001(2)
 O10 0.037(3) 0.046(4) 0.022(3) -0.004(3) -0.007(3) -0.010(3)
 N1 0.022(3) 0.022(3) 0.013(3) -0.004(3) 0.001(3) -0.001(2)
 N2 0.022(3) 0.019(3) 0.022(4) -0.000(3) 0.008(3) 0.002(3)
 N3 0.029(4) 0.022(3) 0.033(4) -0.000(3) 0.001(3) -0.007(3)
 N4 0.027(4) 0.029(3) 0.025(4) -0.005(3) 0.003(3) 0.003(3)
 N5 0.033(4) 0.028(4) 0.028(4) 0.003(3) 0.002(3) -0.002(3)
 N6 0.089(7) 0.070(6) 0.034(5) 0.007(6) -0.013(5) 0.006(4)
 C1 0.021(3) 0.018(3) 0.023(4) -0.006(3) -0.001(3) -0.002(3)
 C2 0.021(4) 0.023(3) 0.026(4) 0.000(3) -0.001(3) 0.001(3)
 C3 0.025(4) 0.025(4) 0.029(4) 0.005(3) -0.005(3) 0.002(3)
 C4 0.033(5) 0.022(4) 0.033(5) 0.011(3) -0.008(4) -0.000(3)
 C5 0.026(4) 0.016(3) 0.031(5) 0.002(3) -0.002(3) -0.003(3)
 C6 0.021(4) 0.014(3) 0.024(4) -0.002(3) -0.001(3) 0.006(3)
 C7 0.022(3) 0.011(3) 0.022(3) 0.002(3) -0.001(3) 0.004(3)
 C8 0.018(3) 0.014(3) 0.024(4) 0.008(3) -0.006(3) -0.001(3)
 C9 0.020(3) 0.016(3) 0.024(4) -0.001(3) -0.005(4) -0.005(3)
 C10 0.033(4) 0.022(4) 0.024(4) -0.001(4) 0.004(4) -0.000(3)
 C11 0.028(4) 0.037(5) 0.031(5) 0.000(4) 0.007(4) -0.002(4)
 C12 0.027(4) 0.029(4) 0.048(5) -0.002(3) -0.001(4) -0.004(4)
 C13 0.028(4) 0.025(4) 0.027(4) -0.000(3) -0.008(3) -0.009(3)
 C14 0.025(4) 0.025(4) 0.031(5) 0.000(3) -0.000(4) -0.005(3)
 C15 0.021(4) 0.019(3) 0.024(4) 0.001(3) -0.000(3) -0.002(3)
 C16 0.021(4) 0.022(3) 0.019(4) 0.000(3) 0.002(3) 0.003(3)
 C17 0.030(5) 0.027(4) 0.030(5) -0.003(3) -0.001(4) 0.000(3)
 C18 0.032(5) 0.038(5) 0.045(5) -0.006(4) 0.004(4) 0.001(4)
 C19 0.033(5) 0.036(4) 0.040(5) 0.010(4) 0.012(4) 0.014(4)
 C20 0.037(4) 0.031(4) 0.024(4) 0.003(3) 0.005(4) 0.006(4)
 C21 0.036(4) 0.028(4) 0.025(4) 0.001(4) 0.002(4) -0.000(3)
 C22 0.023(3) 0.019(3) 0.015(4) -0.005(3) 0.001(3) -0.001(3)
 C23 0.021(3) 0.020(4) 0.020(4) -0.002(3) -0.001(3) 0.008(3)
 C24 0.025(4) 0.025(4) 0.031(4) 0.001(3) -0.004(4) -0.002(3)
 C25 0.025(4) 0.032(4) 0.038(5) 0.001(3) 0.000(4) 0.001(4)
 C26 0.025(4) 0.018(4) 0.041(5) 0.004(3) 0.003(4) -0.001(3)
 C27 0.028(4) 0.020(4) 0.028(4) -0.003(3) -0.001(3) -0.002(3)
 C28 0.017(3) 0.014(3) 0.027(4) -0.001(3) 0.005(3) 0.000(3)
 C29 0.022(4) 0.020(4) 0.033(4) 0.001(3) 0.000(3) -0.004(3)
 C30 0.033(4) 0.025(4) 0.044(5) 0.002(4) 0.009(4) -0.011(4)
 C31 0.025(4) 0.026(4) 0.032(5) -0.000(3) -0.002(4) -0.003(4)
 C32 0.039(5) 0.041(4) 0.028(4) -0.010(4) 0.007(5) 0.007(4)
 C33 0.068(7) 0.033(5) 0.040(6) -0.015(5) 0.002(5) -0.004(4)
 C34 0.039(5) 0.058(6) 0.058(7) -0.017(5) 0.017(5) -0.016(5)

#==============================================================================
_computing_data_collection             'RAPID AUTO (Rigaku, ????)'
_computing_cell_refinement             'RAPID AUTO'
_computing_data_reduction              'RAPID AUTO'
_computing_structure_solution          'SHELXS97 (Sheldrick, 2008)'
_computing_structure_refinement        'CRYSTALS (Carruthers, et al., 1999)'
_computing_publication_material        'CrystalStructure 4.0 (Rigaku, 2010)'
_computing_molecular_graphics          'CrystalStructure 4.0'

#==============================================================================
# MOLECULAR GEOMETRY

_geom_special_details
;
    ENTER SPECIAL DETAILS OF THE MOLECULAR GEOMETRY
;

loop_
_geom_bond_atom_site_label_1
_geom_bond_atom_site_label_2
_geom_bond_distance
_geom_bond_publ_flag
_geom_bond_site_symmetry_1
_geom_bond_site_symmetry_2
Gd1 O1 2.440(5) yes . .
Gd1 O2 2.315(5) yes . .
Gd1 O3 2.228 yes . 3_645
Gd1 O4 2.675(5) yes . .
Gd1 O5 2.534(5) yes . .
Gd1 O6 2.415(5) yes . .
Gd1 O8 2.437(6) yes . .
Gd1 O9 2.485(5) yes . .
Gd1 N3 2.911(7) yes . .
Gd1 N4 2.892(6) yes . .
Gd1 N5 2.570(7) yes . .
Cu1 O1 1.914(5) yes . .
Cu1 O2 1.924(5) yes . .
Cu1 N1 1.899(6) yes . .
Cu1 N2 1.925(6) yes . .
O1 C1 1.335(8) yes . .
O2 C28 1.331(8) yes . .
O3 C7 1.296 yes . .
O4 C27 1.395(9) yes . .
O4 C29 1.441(8) yes . .
O5 N3 1.268(8) yes . .
O6 N3 1.287(9) yes . .
O7 N3 1.216(9) yes . .
O8 N4 1.286(8) yes . .
O9 N4 1.277(8) yes . .
O10 N4 1.233(8) yes . .
N1 C7 1.305(8) yes . .
N1 C8 1.484(9) yes . .
N2 C15 1.462(9) yes . .
N2 C22 1.294(8) yes . .
N5 C31 1.152(10) yes . .
N6 C33 1.148(15) yes . .
C1 C2 1.413(10) yes . .
C1 C6 1.416(9) yes . .
C2 C3 1.382(10) yes . .
C3 C4 1.388(10) yes . .
C4 C5 1.378(11) yes . .
C5 C6 1.403(9) yes . .
C6 C7 1.492(9) yes . .
C8 C9 1.523(8) yes . .
C8 C15 1.565(9) yes . .
C9 C10 1.370(11) yes . .
C9 C14 1.407(11) yes . .
C10 C11 1.384(11) yes . .
C11 C12 1.388(12) yes . .
C12 C13 1.373(12) yes . .
C13 C14 1.388(10) yes . .
C15 C16 1.516(10) yes . .
C16 C17 1.380(10) yes . .
C16 C21 1.387(10) yes . .
C17 C18 1.391(11) yes . .
C18 C19 1.366(12) yes . .
C19 C20 1.376(11) yes . .
C20 C21 1.395(11) yes . .
C22 C23 1.441(9) yes . .
C23 C24 1.402(10) yes . .
C23 C28 1.417(9) yes . .
C24 C25 1.375(11) yes . .
C25 C26 1.402(11) yes . .
C26 C27 1.382(10) yes . .
C27 C28 1.400(10) yes . .
C29 C30 1.507(10) yes . .
C31 C32 1.445(12) yes . .
C33 C34 1.442(14) yes . .
C2 H1 0.930 no . .
C3 H2 0.930 no . .
C4 H3 0.930 no . .
C5 H4 0.930 no . .
C8 H5 0.980 no . .
C10 H6 0.930 no . .
C11 H7 0.930 no . .
C12 H8 0.930 no . .
C13 H9 0.930 no . .
C14 H10 0.930 no . .
C15 H11 0.980 no . .
C17 H12 0.930 no . .
C18 H13 0.930 no . .
C19 H14 0.930 no . .
C20 H15 0.930 no . .
C21 H16 0.930 no . .
C22 H17 0.930 no . .
C24 H18 0.930 no . .
C25 H19 0.930 no . .
C26 H20 0.930 no . .
C29 H21 0.970 no . .
C29 H22 0.970 no . .
C30 H23 0.960 no . .
C30 H24 0.960 no . .
C30 H25 0.960 no . .
C32 H26 0.960 no . .
C32 H27 0.960 no . .
C32 H28 0.960 no . .
C34 H29 0.960 no . .
C34 H30 0.960 no . .
C34 H31 0.960 no . .

loop_
_geom_angle_atom_site_label_1
_geom_angle_atom_site_label_2
_geom_angle_atom_site_label_3
_geom_angle
_geom_angle_publ_flag
_geom_angle_site_symmetry_1
_geom_angle_site_symmetry_2
_geom_angle_site_symmetry_3
O1 Gd1 O2 65.08(15) yes . . .
O1 Gd1 O3 142.335 yes . . 3_645
O1 Gd1 O4 117.58(14) yes . . .
O1 Gd1 O5 69.39(15) yes . . .
O1 Gd1 O6 75.54(16) yes . . .
O1 Gd1 O8 94.76(16) yes . . .
O1 Gd1 O9 139.15(15) yes . . .
O1 Gd1 N3 70.99(16) yes . . .
O1 Gd1 N4 118.11(16) yes . . .
O1 Gd1 N5 75.75(17) yes . . .
O2 Gd1 O3 98.697 yes . . 3_645
O2 Gd1 O4 60.95(15) yes . . .
O2 Gd1 O5 72.01(17) yes . . .
O2 Gd1 O6 119.65(17) yes . . .
O2 Gd1 O8 153.16(17) yes . . .
O2 Gd1 O9 133.78(16) yes . . .
O2 Gd1 N3 96.07(17) yes . . .
O2 Gd1 N4 152.24(17) yes . . .
O2 Gd1 N5 86.35(19) yes . . .
O3 Gd1 O4 75.799 yes 3_645 . .
O3 Gd1 O5 73.305 yes 3_645 . .
O3 Gd1 O6 85.575 yes 3_645 . .
O3 Gd1 O8 107.837 yes 3_645 . .
O3 Gd1 O9 77.133 yes 3_645 . .
O3 Gd1 N3 77.793 yes 3_645 . .
O3 Gd1 N4 92.329 yes 3_645 . .
O3 Gd1 N5 139.674 yes 3_645 . .
O4 Gd1 O5 117.62(16) yes . . .
O4 Gd1 O6 161.02(15) yes . . .
O4 Gd1 O8 121.49(17) yes . . .
O4 Gd1 O9 73.67(15) yes . . .
O4 Gd1 N3 141.22(17) yes . . .
O4 Gd1 N4 97.83(16) yes . . .
O4 Gd1 N5 71.97(18) yes . . .
O5 Gd1 O6 51.63(17) yes . . .
O5 Gd1 O8 119.10(17) yes . . .
O5 Gd1 O9 143.74(16) yes . . .
O5 Gd1 N3 25.77(17) yes . . .
O5 Gd1 N4 135.73(17) yes . . .
O5 Gd1 N5 144.21(17) yes . . .
O6 Gd1 O8 67.55(17) yes . . .
O6 Gd1 O9 106.03(16) yes . . .
O6 Gd1 N3 25.88(17) yes . . .
O6 Gd1 N4 86.40(17) yes . . .
O6 Gd1 N5 126.43(18) yes . . .
O8 Gd1 O9 52.26(16) yes . . .
O8 Gd1 N3 93.41(18) yes . . .
O8 Gd1 N4 26.18(17) yes . . .
O8 Gd1 N5 70.93(19) yes . . .
O9 Gd1 N3 126.66(17) yes . . .
O9 Gd1 N4 26.09(16) yes . . .
O9 Gd1 N5 71.08(18) yes . . .
N3 Gd1 N4 111.18(17) yes . . .
N3 Gd1 N5 141.80(18) yes . . .
N4 Gd1 N5 69.14(19) yes . . .
O1 Cu1 O2 83.7(2) yes . . .
O1 Cu1 N1 98.0(2) yes . . .
O1 Cu1 N2 175.8(2) yes . . .
O2 Cu1 N1 177.8(3) yes . . .
O2 Cu1 N2 92.4(3) yes . . .
N1 Cu1 N2 85.8(3) yes . . .
Gd1 O1 Cu1 99.26(18) yes . . .
Gd1 O1 C1 135.1(4) yes . . .
Cu1 O1 C1 123.0(4) yes . . .
Gd1 O2 Cu1 103.4(2) yes . . .
Gd1 O2 C28 130.3(4) yes . . .
Cu1 O2 C28 126.2(4) yes . . .
Gd1 O3 C7 177.546 yes 3_655 . .
Gd1 O4 C27 116.0(4) yes . . .
Gd1 O4 C29 125.3(4) yes . . .
C27 O4 C29 117.7(5) yes . . .
Gd1 O5 N3 94.0(4) yes . . .
Gd1 O6 N3 99.1(4) yes . . .
Gd1 O8 N4 97.1(4) yes . . .
Gd1 O9 N4 95.1(4) yes . . .
Cu1 N1 C7 125.8(5) yes . . .
Cu1 N1 C8 115.4(4) yes . . .
C7 N1 C8 118.7(5) yes . . .
Cu1 N2 C15 113.0(4) yes . . .
Cu1 N2 C22 125.8(5) yes . . .
C15 N2 C22 121.2(6) yes . . .
Gd1 N3 O5 60.3(4) yes . . .
Gd1 N3 O6 55.0(3) yes . . .
Gd1 N3 O7 176.4(6) yes . . .
O5 N3 O6 115.2(6) yes . . .
O5 N3 O7 123.3(7) yes . . .
O6 N3 O7 121.4(6) yes . . .
Gd1 N4 O8 56.7(4) yes . . .
Gd1 N4 O9 58.8(4) yes . . .
Gd1 N4 O10 178.0(5) yes . . .
O8 N4 O9 115.6(6) yes . . .
O8 N4 O10 121.6(6) yes . . .
O9 N4 O10 122.8(6) yes . . .
Gd1 N5 C31 167.9(6) yes . . .
O1 C1 C2 117.0(6) yes . . .
O1 C1 C6 124.6(7) yes . . .
C2 C1 C6 118.4(6) yes . . .
C1 C2 C3 121.6(6) yes . . .
C2 C3 C4 120.0(7) yes . . .
C3 C4 C5 119.2(7) yes . . .
C4 C5 C6 122.6(6) yes . . .
C1 C6 C5 118.1(6) yes . . .
C1 C6 C7 125.7(6) yes . . .
C5 C6 C7 116.2(6) yes . . .
O3 C7 N1 121.038 yes . . .
O3 C7 C6 117.307 yes . . .
N1 C7 C6 121.6(6) yes . . .
N1 C8 C9 113.6(6) yes . . .
N1 C8 C15 108.4(5) yes . . .
C9 C8 C15 112.4(5) yes . . .
C8 C9 C10 124.7(7) yes . . .
C8 C9 C14 117.3(7) yes . . .
C10 C9 C14 118.0(6) yes . . .
C9 C10 C11 121.2(7) yes . . .
C10 C11 C12 120.3(8) yes . . .
C11 C12 C13 119.6(7) yes . . .
C12 C13 C14 119.8(7) yes . . .
C9 C14 C13 121.0(7) yes . . .
N2 C15 C8 108.9(6) yes . . .
N2 C15 C16 111.0(6) yes . . .
C8 C15 C16 112.3(6) yes . . .
C15 C16 C17 123.1(7) yes . . .
C15 C16 C21 118.0(6) yes . . .
C17 C16 C21 118.9(7) yes . . .
C16 C17 C18 120.6(7) yes . . .
C17 C18 C19 120.2(8) yes . . .
C18 C19 C20 120.2(8) yes . . .
C19 C20 C21 119.9(8) yes . . .
C16 C21 C20 120.3(7) yes . . .
N2 C22 C23 125.5(7) yes . . .
C22 C23 C24 119.0(6) yes . . .
C22 C23 C28 122.6(6) yes . . .
C24 C23 C28 118.4(6) yes . . .
C23 C24 C25 121.1(7) yes . . .
C24 C25 C26 120.8(7) yes . . .
C25 C26 C27 118.8(7) yes . . .
O4 C27 C26 125.5(7) yes . . .
O4 C27 C28 113.1(6) yes . . .
C26 C27 C28 121.4(7) yes . . .
O2 C28 C23 123.8(6) yes . . .
O2 C28 C27 116.8(6) yes . . .
C23 C28 C27 119.4(6) yes . . .
O4 C29 C30 111.8(6) yes . . .
N5 C31 C32 178.8(8) yes . . .
N6 C33 C34 179.1(10) yes . . .
C1 C2 H1 118.584 no . . .
C3 C2 H1 119.768 no . . .
C2 C3 H2 119.861 no . . .
C4 C3 H2 120.167 no . . .
C3 C4 H3 120.436 no . . .
C5 C4 H3 120.376 no . . .
C4 C5 H4 118.848 no . . .
C6 C5 H4 118.504 no . . .
N1 C8 H5 107.448 no . . .
C9 C8 H5 107.272 no . . .
C15 C8 H5 107.334 no . . .
C9 C10 H6 119.050 no . . .
C11 C10 H6 119.749 no . . .
C10 C11 H7 119.820 no . . .
C12 C11 H7 119.844 no . . .
C11 C12 H8 120.287 no . . .
C13 C12 H8 120.069 no . . .
C12 C13 H9 120.084 no . . .
C14 C13 H9 120.143 no . . .
C9 C14 H10 119.504 no . . .
C13 C14 H10 119.477 no . . .
N2 C15 H11 108.090 no . . .
C8 C15 H11 108.040 no . . .
C16 C15 H11 108.357 no . . .
C16 C17 H12 119.840 no . . .
C18 C17 H12 119.588 no . . .
C17 C18 H13 119.848 no . . .
C19 C18 H13 119.979 no . . .
C18 C19 H14 119.801 no . . .
C20 C19 H14 119.991 no . . .
C19 C20 H15 119.954 no . . .
C21 C20 H15 120.191 no . . .
C16 C21 H16 119.973 no . . .
C20 C21 H16 119.746 no . . .
N2 C22 H17 117.310 no . . .
C23 C22 H17 117.144 no . . .
C23 C24 H18 119.080 no . . .
C25 C24 H18 119.798 no . . .
C24 C25 H19 119.422 no . . .
C26 C25 H19 119.791 no . . .
C25 C26 H20 120.519 no . . .
C27 C26 H20 120.651 no . . .
O4 C29 H21 107.402 no . . .
O4 C29 H22 106.516 no . . .
C30 C29 H21 111.361 no . . .
C30 C29 H22 110.308 no . . .
H21 C29 H22 109.316 no . . .
C29 C30 H23 109.849 no . . .
C29 C30 H24 109.832 no . . .
C29 C30 H25 108.812 no . . .
H23 C30 H24 109.446 no . . .
H23 C30 H25 109.446 no . . .
H24 C30 H25 109.440 no . . .
C31 C32 H26 109.427 no . . .
C31 C32 H27 109.360 no . . .
C31 C32 H28 109.721 no . . .
H26 C32 H27 109.434 no . . .
H26 C32 H28 109.440 no . . .
H27 C32 H28 109.445 no . . .
C33 C34 H29 109.720 no . . .
C33 C34 H30 109.560 no . . .
C33 C34 H31 109.234 no . . .
H29 C34 H30 109.437 no . . .
H29 C34 H31 109.446 no . . .
H30 C34 H31 109.429 no . . .

loop_
_geom_torsion_atom_site_label_1
_geom_torsion_atom_site_label_2
_geom_torsion_atom_site_label_3
_geom_torsion_atom_site_label_4
_geom_torsion
_geom_torsion_publ_flag
_geom_torsion_site_symmetry_1
_geom_torsion_site_symmetry_2
_geom_torsion_site_symmetry_3
_geom_torsion_site_symmetry_4
O1 Gd1 O2 Cu1 20.93(17) no . . . .
O1 Gd1 O2 C28 -162.5(5) no . . . .
O2 Gd1 O1 Cu1 -20.73(18) no . . . .
O2 Gd1 O1 C1 178.3(5) no . . . .
O3 Gd1 O1 Cu1 50.1 no 3_645 . . .
O3 Gd1 O1 C1 -110.9 no 3_645 . . .
O1 Gd1 O4 C27 47.2(4) no . . . .
O1 Gd1 O4 C29 -144.3(3) no . . . .
O4 Gd1 O1 Cu1 -52.9(3) no . . . .
O4 Gd1 O1 C1 146.2(4) no . . . .
O1 Gd1 O5 N3 88.8(3) no . . . .
O5 Gd1 O1 Cu1 58.38(19) no . . . .
O5 Gd1 O1 C1 -102.6(4) no . . . .
O1 Gd1 O6 N3 -76.2(3) no . . . .
O6 Gd1 O1 Cu1 112.4(2) no . . . .
O6 Gd1 O1 C1 -48.6(4) no . . . .
O1 Gd1 O8 N4 154.4(3) no . . . .
O8 Gd1 O1 Cu1 177.72(19) no . . . .
O8 Gd1 O1 C1 16.8(4) no . . . .
O1 Gd1 O9 N4 -43.6(4) no . . . .
O9 Gd1 O1 Cu1 -149.70(19) no . . . .
O9 Gd1 O1 C1 49.4(5) no . . . .
O1 Gd1 N3 O5 -81.8(3) no . . . .
O1 Gd1 N3 O6 96.0(3) no . . . .
N3 Gd1 O1 Cu1 85.7(2) no . . . .
N3 Gd1 O1 C1 -75.2(4) no . . . .
O1 Gd1 N4 O8 -29.2(4) no . . . .
O1 Gd1 N4 O9 149.2(3) no . . . .
N4 Gd1 O1 Cu1 -169.82(17) no . . . .
N4 Gd1 O1 C1 29.2(5) no . . . .
N5 Gd1 O1 Cu1 -113.3(3) no . . . .
N5 Gd1 O1 C1 85.7(4) no . . . .
O3 Gd1 O2 Cu1 -123.4 no 3_645 . . .
O3 Gd1 O2 C28 53.2 no 3_645 . . .
O2 Gd1 O4 C27 13.8(3) no . . . .
O2 Gd1 O4 C29 -177.8(4) no . . . .
O4 Gd1 O2 Cu1 168.3(3) no . . . .
O4 Gd1 O2 C28 -15.1(4) no . . . .
O2 Gd1 O5 N3 158.2(3) no . . . .
O5 Gd1 O2 Cu1 -54.17(19) no . . . .
O5 Gd1 O2 C28 122.4(4) no . . . .
O2 Gd1 O6 N3 -26.5(3) no . . . .
O6 Gd1 O2 Cu1 -33.5(3) no . . . .
O6 Gd1 O2 C28 143.1(4) no . . . .
O2 Gd1 O8 N4 115.0(4) no . . . .
O8 Gd1 O2 Cu1 65.2(5) no . . . .
O8 Gd1 O2 C28 -118.2(4) no . . . .
O2 Gd1 O9 N4 -146.1(3) no . . . .
O9 Gd1 O2 Cu1 156.16(18) no . . . .
O9 Gd1 O2 C28 -27.3(5) no . . . .
O2 Gd1 N3 O5 -20.8(3) no . . . .
O2 Gd1 N3 O6 157.0(3) no . . . .
N3 Gd1 O2 Cu1 -44.8(3) no . . . .
N3 Gd1 O2 C28 131.8(4) no . . . .
O2 Gd1 N4 O8 -118.5(4) no . . . .
O2 Gd1 N4 O9 59.9(5) no . . . .
N4 Gd1 O2 Cu1 124.4(3) no . . . .
N4 Gd1 O2 C28 -59.0(6) no . . . .
N5 Gd1 O2 Cu1 96.9(3) no . . . .
N5 Gd1 O2 C28 -86.5(4) no . . . .
O3 Gd1 O4 C27 -94.8 no 3_645 . . .
O3 Gd1 O4 C29 73.6 no 3_645 . . .
O3 Gd1 O5 N3 -96.5 no 3_645 . . .
O3 Gd1 O6 N3 71.0 no 3_645 . . .
O3 Gd1 O8 N4 -56.1 no 3_645 . . .
O3 Gd1 O9 N4 124.1 no 3_645 . . .
O3 Gd1 N3 O5 76.8 no 3_645 . . .
O3 Gd1 N3 O6 -105.4 no 3_645 . . .
O3 Gd1 N4 O8 127.7 no 3_645 . . .
O3 Gd1 N4 O9 -53.9 no 3_645 . . .
O4 Gd1 O5 N3 -160.03(19) no . . . .
O5 Gd1 O4 C27 -32.7(3) no . . . .
O5 Gd1 O4 C29 135.8(3) no . . . .
O4 Gd1 O8 N4 27.9(4) no . . . .
O8 Gd1 O4 C27 162.7(3) no . . . .
O8 Gd1 O4 C29 -28.8(4) no . . . .
O4 Gd1 O9 N4 -157.1(3) no . . . .
O9 Gd1 O4 C27 -175.3(3) no . . . .
O9 Gd1 O4 C29 -6.9(3) no . . . .
O4 Gd1 N3 O5 28.9(4) no . . . .
O4 Gd1 N3 O6 -153.31(19) no . . . .
N3 Gd1 O4 C27 -46.4(4) no . . . .
N3 Gd1 O4 C29 122.1(4) no . . . .
O4 Gd1 N4 O8 -156.3(3) no . . . .
O4 Gd1 N4 O9 22.1(3) no . . . .
N4 Gd1 O4 C27 174.7(3) no . . . .
N4 Gd1 O4 C29 -16.8(4) no . . . .
N5 Gd1 O4 C27 109.7(3) no . . . .
N5 Gd1 O4 C29 -81.8(4) no . . . .
O5 Gd1 O6 N3 -1.22(19) no . . . .
O6 Gd1 O5 N3 1.22(19) no . . . .
O5 Gd1 O8 N4 -136.5(3) no . . . .
O8 Gd1 O5 N3 5.0(3) no . . . .
O5 Gd1 O9 N4 88.2(4) no . . . .
O9 Gd1 O5 N3 -59.8(4) no . . . .
O5 Gd1 N3 O5 -0.0(3) no . . . .
O5 Gd1 N3 O6 177.8(5) no . . . .
N3 Gd1 O5 N3 -0.0(3) no . . . .
O5 Gd1 N4 O8 59.5(4) no . . . .
O5 Gd1 N4 O9 -122.1(3) no . . . .
N4 Gd1 O5 N3 -20.8(4) no . . . .
N5 Gd1 O5 N3 102.6(4) no . . . .
O6 Gd1 O8 N4 -133.3(3) no . . . .
O8 Gd1 O6 N3 -177.7(3) no . . . .
O6 Gd1 O9 N4 42.7(3) no . . . .
O9 Gd1 O6 N3 146.2(3) no . . . .
O6 Gd1 N3 O5 -177.8(6) no . . . .
O6 Gd1 N3 O6 -0.0(3) no . . . .
N3 Gd1 O6 N3 -0.0(3) no . . . .
O6 Gd1 N4 O8 42.3(3) no . . . .
O6 Gd1 N4 O9 -139.3(3) no . . . .
N4 Gd1 O6 N3 163.6(3) no . . . .
N5 Gd1 O6 N3 -135.8(3) no . . . .
O8 Gd1 O9 N4 -0.9(2) no . . . .
O9 Gd1 O8 N4 0.9(2) no . . . .
O8 Gd1 N3 O5 -175.7(3) no . . . .
O8 Gd1 N3 O6 2.1(3) no . . . .
N3 Gd1 O8 N4 -134.4(3) no . . . .
O8 Gd1 N4 O8 0.0(3) no . . . .
O8 Gd1 N4 O9 178.4(6) no . . . .
N4 Gd1 O8 N4 -0.0(3) no . . . .
N5 Gd1 O8 N4 81.3(3) no . . . .
O9 Gd1 N3 O5 140.4(3) no . . . .
O9 Gd1 N3 O6 -41.8(4) no . . . .
N3 Gd1 O9 N4 60.3(3) no . . . .
O9 Gd1 N4 O8 -178.4(6) no . . . .
O9 Gd1 N4 O9 0.0(3) no . . . .
N4 Gd1 O9 N4 0.0(3) no . . . .
N5 Gd1 O9 N4 -81.0(3) no . . . .
N3 Gd1 N4 O8 49.9(3) no . . . .
N3 Gd1 N4 O9 -131.7(3) no . . . .
N4 Gd1 N3 O5 164.6(3) no . . . .
N4 Gd1 N3 O6 -17.6(3) no . . . .
N5 Gd1 N3 O5 -112.6(4) no . . . .
N5 Gd1 N3 O6 65.2(4) no . . . .
N5 Gd1 N4 O8 -89.0(3) no . . . .
N5 Gd1 N4 O9 89.4(3) no . . . .
O1 Cu1 O2 Gd1 -24.6(2) no . . . .
O1 Cu1 O2 C28 158.7(4) no . . . .
O2 Cu1 O1 Gd1 22.87(19) no . . . .
O2 Cu1 O1 C1 -173.1(4) no . . . .
O1 Cu1 N1 C7 5.2(5) no . . . .
O1 Cu1 N1 C8 -178.8(4) no . . . .
N1 Cu1 O1 Gd1 -158.6(2) no . . . .
N1 Cu1 O1 C1 5.5(4) no . . . .
O2 Cu1 N2 C15 -162.9(4) no . . . .
O2 Cu1 N2 C22 18.5(5) no . . . .
N2 Cu1 O2 Gd1 157.0(3) no . . . .
N2 Cu1 O2 C28 -19.7(4) no . . . .
N1 Cu1 N2 C15 18.4(4) no . . . .
N1 Cu1 N2 C22 -160.1(5) no . . . .
N2 Cu1 N1 C7 -176.5(5) no . . . .
N2 Cu1 N1 C8 -0.5(4) no . . . .
Gd1 O1 C1 C2 -33.3(8) no . . . .
Gd1 O1 C1 C6 147.5(4) no . . . .
Cu1 O1 C1 C2 169.3(3) no . . . .
Cu1 O1 C1 C6 -9.9(8) no . . . .
Gd1 O2 C28 C23 -162.9(4) no . . . .
Gd1 O2 C28 C27 14.3(8) no . . . .
Cu1 O2 C28 C23 13.0(9) no . . . .
Cu1 O2 C28 C27 -169.9(4) no . . . .
Gd1 O4 C27 C26 169.5(5) no . . . .
Gd1 O4 C27 C28 -13.0(7) no . . . .
Gd1 O4 C29 C30 -82.0(6) no . . . .
C27 O4 C29 C30 86.3(7) no . . . .
C29 O4 C27 C26 0.1(9) no . . . .
C29 O4 C27 C28 177.6(5) no . . . .
Gd1 O5 N3 Gd1 0.0 no . . . .
Gd1 O5 N3 O6 -2.0(5) no . . . .
Gd1 O5 N3 O7 179.5(5) no . . . .
Gd1 O6 N3 Gd1 -0.0 no . . . .
Gd1 O6 N3 O5 2.1(5) no . . . .
Gd1 O6 N3 O7 -179.4(5) no . . . .
Gd1 O8 N4 Gd1 0.0 no . . . .
Gd1 O8 N4 O9 -1.5(6) no . . . .
Gd1 O8 N4 O10 178.7(5) no . . . .
Gd1 O9 N4 Gd1 0.0 no . . . .
Gd1 O9 N4 O8 1.5(5) no . . . .
Gd1 O9 N4 O10 -178.7(5) no . . . .
Cu1 N1 C7 O3 171.7 no . . . .
Cu1 N1 C7 C6 -11.5(8) no . . . .
Cu1 N1 C8 C9 109.9(4) no . . . .
Cu1 N1 C8 C15 -15.9(6) no . . . .
C7 N1 C8 C9 -73.8(7) no . . . .
C7 N1 C8 C15 160.5(5) no . . . .
C8 N1 C7 O3 -4.3 no . . . .
C8 N1 C7 C6 172.6(5) no . . . .
Cu1 N2 C15 C8 -30.8(6) no . . . .
Cu1 N2 C15 C16 93.4(5) no . . . .
Cu1 N2 C22 C23 -10.7(9) no . . . .
C15 N2 C22 C23 170.8(5) no . . . .
C22 N2 C15 C8 147.8(6) no . . . .
C22 N2 C15 C16 -88.0(7) no . . . .
O1 C1 C2 C3 179.2(5) no . . . .
O1 C1 C6 C5 -177.8(5) no . . . .
O1 C1 C6 C7 3.8(10) no . . . .
C2 C1 C6 C5 3.0(9) no . . . .
C2 C1 C6 C7 -175.4(6) no . . . .
C6 C1 C2 C3 -1.5(9) no . . . .
C1 C2 C3 C4 -0.6(10) no . . . .
C2 C3 C4 C5 1.2(11) no . . . .
C3 C4 C5 C6 0.4(11) no . . . .
C4 C5 C6 C1 -2.6(10) no . . . .
C4 C5 C6 C7 176.0(6) no . . . .
C1 C6 C7 O3 -175.2 no . . . .
C1 C6 C7 N1 7.8(10) no . . . .
C5 C6 C7 O3 6.4 no . . . .
C5 C6 C7 N1 -170.6(6) no . . . .
N1 C8 C9 C10 -12.6(8) no . . . .
N1 C8 C9 C14 167.7(5) no . . . .
N1 C8 C15 N2 29.2(7) no . . . .
N1 C8 C15 C16 -94.2(6) no . . . .
C9 C8 C15 N2 -97.3(6) no . . . .
C9 C8 C15 C16 139.3(6) no . . . .
C15 C8 C9 C10 111.0(7) no . . . .
C15 C8 C9 C14 -68.7(7) no . . . .
C8 C9 C10 C11 -178.4(5) no . . . .
C8 C9 C14 C13 178.3(5) no . . . .
C10 C9 C14 C13 -1.4(9) no . . . .
C14 C9 C10 C11 1.3(10) no . . . .
C9 C10 C11 C12 -0.6(11) no . . . .
C10 C11 C12 C13 -0.1(11) no . . . .
C11 C12 C13 C14 0.0(11) no . . . .
C12 C13 C14 C9 0.7(11) no . . . .
N2 C15 C16 C17 -27.1(9) no . . . .
N2 C15 C16 C21 155.0(5) no . . . .
C8 C15 C16 C17 95.0(7) no . . . .
C8 C15 C16 C21 -82.8(7) no . . . .
C15 C16 C17 C18 -179.0(6) no . . . .
C15 C16 C21 C20 178.9(6) no . . . .
C17 C16 C21 C20 1.0(11) no . . . .
C21 C16 C17 C18 -1.2(10) no . . . .
C16 C17 C18 C19 0.4(11) no . . . .
C17 C18 C19 C20 0.5(11) no . . . .
C18 C19 C20 C21 -0.7(11) no . . . .
C19 C20 C21 C16 -0.1(11) no . . . .
N2 C22 C23 C24 178.7(6) no . . . .
N2 C22 C23 C28 -3.3(10) no . . . .
C22 C23 C24 C25 175.9(6) no . . . .
C22 C23 C28 O2 2.1(10) no . . . .
C22 C23 C28 C27 -175.0(6) no . . . .
C24 C23 C28 O2 -179.9(6) no . . . .
C24 C23 C28 C27 3.0(9) no . . . .
C28 C23 C24 C25 -2.1(10) no . . . .
C23 C24 C25 C26 1.3(11) no . . . .
C24 C25 C26 C27 -1.4(11) no . . . .
C25 C26 C27 O4 179.7(7) no . . . .
C25 C26 C27 C28 2.3(11) no . . . .
O4 C27 C28 O2 1.8(9) no . . . .
O4 C27 C28 C23 179.1(5) no . . . .
C26 C27 C28 O2 179.5(6) no . . . .
C26 C27 C28 C23 -3.2(10) no . . . .

loop_
_geom_contact_atom_site_label_1
_geom_contact_atom_site_label_2
_geom_contact_distance
_geom_contact_publ_flag
_geom_contact_site_symmetry_1
_geom_contact_site_symmetry_2
Cu1 O5 2.818(5) no . .
Cu1 C6 3.221(6) no . .
Cu1 C17 3.541(8) no . .
Cu1 C23 3.291(7) no . .
O1 C7 3.049(8) no . .
O2 C22 2.935(9) no . .
O3 C5 2.7107 no . .
O3 C8 2.6953 no . .
O3 C9 3.1342 no . .
O3 C10 3.4415 no . .
O3 C30 3.3961 no . 3_655
O5 C5 3.302(8) no . 3_645
O5 C17 3.371(9) no . .
O6 C1 3.345(8) no . .
O6 C2 3.542(8) no . .
O6 C9 3.508(8) no . 3_645
O6 C10 3.388(9) no . 3_645
O6 C11 3.442(10) no . 3_645
O7 C11 3.370(10) no . 3_645
O7 C30 3.212(10) no . 3_655
O8 C2 3.305(8) no . .
O8 C14 3.462(9) no . 3_645
O8 C31 3.559(9) no . .
O9 C8 3.372(8) no . 3_645
O9 C29 3.065(9) no . .
O9 C30 3.468(9) no . .
O10 C14 3.449(10) no . 3_645
N1 C1 3.007(9) no . .
N1 C10 2.919(9) no . .
N1 C16 3.324(9) no . .
N2 C9 3.354(8) no . .
N2 C17 2.863(10) no . .
N2 C28 2.960(9) no . .
N3 C10 3.569(10) no . 3_645
N4 C14 3.345(10) no . 3_645
C1 C4 2.816(10) no . .
C2 C5 2.750(9) no . .
C3 C6 2.812(10) no . .
C7 C9 3.126(9) no . .
C7 C10 3.300(10) no . .
C7 C30 3.473(10) no . 3_655
C8 C17 3.454(10) no . .
C8 C21 3.282(10) no . .
C9 C12 2.794(9) no . .
C10 C13 2.766(11) no . .
C10 C15 3.597(10) no . .
C11 C14 2.748(12) no . .
C14 C15 3.160(10) no . .
C16 C19 2.780(11) no . .
C16 C22 3.207(10) no . .
C17 C20 2.758(11) no . .
C17 C22 3.551(10) no . .
C18 C21 2.758(11) no . .
C23 C26 2.817(10) no . .
C24 C27 2.772(11) no . .
C25 C28 2.787(10) no . .
C26 C29 2.871(11) no . .
C26 C30 3.422(11) no . .
C27 C30 3.205(11) no . .
Cu1 C34 3.266(10) no . .
O1 C34 3.357(10) no . .
O2 C34 3.489(11) no . .
O6 C32 3.278(9) no . 2_465
O7 C21 3.421(10) no . 2_466
O7 C32 3.485(11) no . 2_465
O8 N6 3.544(10) no . 2_465
O8 C33 3.070(11) no . 2_465
O8 C34 3.015(11) no . 2_465
O9 C24 3.444(9) no . 4_664
O10 C11 3.267(10) no . 2_465
O10 C24 3.357(9) no . 4_664
O10 C25 3.350(10) no . 4_664
O10 C33 3.275(10) no . 2_465
O10 C34 3.334(11) no . 2_465
N4 C33 3.511(11) no . 2_465
N4 C34 3.593(11) no . 2_465
N5 C34 3.466(12) no . .
N6 O8 3.544(10) no . 2_565
N6 C19 3.518(11) no . 2_566
N6 C20 3.420(12) no . 2_566
N6 C31 3.560(12) no . 2_565
N6 C32 3.450(13) no . 2_565
C3 C31 3.451(10) no . 2_465
C3 C32 3.583(11) no . 2_465
C11 O10 3.267(10) no . 2_565
C11 C25 3.586(11) no . 3_755
C19 N6 3.518(11) no . 2_466
C19 C22 3.501(10) no . 2_466
C20 N6 3.420(12) no . 2_466
C21 O7 3.421(10) no . 2_566
C22 C19 3.501(10) no . 2_566
C24 O9 3.444(9) no . 4_665
C24 O10 3.357(9) no . 4_665
C25 O10 3.350(10) no . 4_665
C25 C11 3.586(11) no . 3_745
C31 N6 3.560(12) no . 2_465
C31 C3 3.451(10) no . 2_565
C32 O6 3.278(9) no . 2_565
C32 O7 3.485(11) no . 2_565
C32 N6 3.450(13) no . 2_465
C32 C3 3.583(11) no . 2_565
C33 O8 3.070(11) no . 2_565
C33 O10 3.275(10) no . 2_565
C33 N4 3.511(11) no . 2_565
C34 Cu1 3.266(10) no . .
C34 O1 3.357(10) no . .
C34 O2 3.489(11) no . .
C34 O8 3.015(11) no . 2_565
C34 O10 3.334(11) no . 2_565
C34 N4 3.593(11) no . 2_565
C34 N5 3.466(12) no . .
Gd1 H1 3.3726 no . .
Gd1 H4 3.3208 no . 3_645
Cu1 H5 3.5586 no . .
Cu1 H6 3.5609 no . .
Cu1 H12 2.8855 no . .
O1 H1 2.4915 no . .
O2 H4 2.8115 no . 3_645
O2 H12 3.4962 no . .
O3 H4 2.3392 no . .
O3 H5 2.4433 no . .
O3 H6 3.2780 no . .
O3 H23 2.6651 no . 3_655
O3 H25 3.5784 no . 3_655
O4 H4 3.4701 no . 3_645
O4 H20 2.6865 no . .
O4 H23 2.6396 no . .
O4 H24 3.2602 no . .
O4 H25 2.6380 no . .
O5 H4 2.5831 no . 3_645
O5 H12 2.5139 no . .
O6 H1 3.3972 no . .
O7 H7 3.1923 no . 3_645
O7 H23 3.5130 no . 3_655
O7 H24 3.0068 no . 3_655
O7 H25 2.6616 no . 3_655
O8 H1 2.5196 no . .
O8 H10 3.2858 no . 3_645
O9 H5 2.4279 no . 3_645
O9 H10 3.4316 no . 3_645
O9 H22 2.4552 no . .
O9 H23 2.9617 no . .
O10 H5 3.4354 no . 3_645
O10 H10 2.7312 no . 3_645
O10 H16 3.1848 no . 3_645
N1 H6 2.5796 no . .
N1 H11 3.2401 no . .
N1 H12 3.4354 no . .
N1 H23 2.9376 no . 3_655
N2 H5 3.2151 no . .
N2 H12 2.5669 no . .
N3 H12 3.4970 no . .
N3 H25 3.3961 no . 3_655
N4 H5 2.9525 no . 3_645
N4 H10 2.8843 no . 3_645
N4 H22 3.5975 no . .
N5 H1 2.9466 no . .
N5 H22 3.2780 no . .
N5 H26 3.0491 no . .
N5 H27 3.0599 no . .
N5 H28 3.0567 no . .
N6 H29 3.0487 no . .
N6 H30 3.0540 no . .
N6 H31 3.0410 no . .
C1 H2 3.2750 no . .
C1 H4 3.2544 no . .
C2 H3 3.2396 no . .
C3 H4 3.2205 no . .
C4 H1 3.2364 no . .
C4 H12 3.4402 no . 3_655
C4 H13 3.5739 no . 3_655
C5 H2 3.2271 no . .
C5 H12 3.4620 no . 3_655
C6 H1 3.2646 no . .
C6 H3 3.2747 no . .
C6 H23 3.4814 no . 3_655
C7 H4 2.5599 no . .
C7 H5 2.5396 no . .
C7 H6 2.8709 no . .
C7 H23 2.6824 no . 3_655
C7 H25 3.4780 no . 3_655
C8 H6 2.7240 no . .
C8 H10 2.6208 no . .
C8 H12 3.5388 no . .
C8 H16 3.2527 no . .
C8 H23 3.2869 no . 3_655
C9 H7 3.2321 no . .
C9 H9 3.2703 no . .
C9 H11 2.5258 no . .
C10 H5 3.2031 no . .
C10 H8 3.2436 no . .
C10 H10 3.2196 no . .
C10 H11 3.5791 no . .
C11 H9 3.2284 no . .
C12 H6 3.2410 no . .
C12 H10 3.2235 no . .
C13 H7 3.2247 no . .
C14 H5 2.6373 no . .
C14 H6 3.2223 no . .
C14 H8 3.2291 no . .
C14 H11 2.7542 no . .
C14 H16 3.4894 no . .
C15 H10 3.0391 no . .
C15 H12 2.7106 no . .
C15 H16 2.6171 no . .
C15 H17 2.5204 no . .
C16 H5 2.5140 no . .
C16 H13 3.2423 no . .
C16 H15 3.2513 no . .
C16 H17 3.2660 no . .
C17 H3 3.1753 no . 3_645
C17 H5 3.4017 no . .
C17 H11 3.2597 no . .
C17 H14 3.2288 no . .
C17 H16 3.2246 no . .
C17 H23 3.4903 no . 3_655
C17 H24 3.5364 no . 3_655
C18 H3 3.4008 no . 3_645
C18 H15 3.2149 no . .
C18 H24 3.4395 no . 3_655
C19 H12 3.2239 no . .
C19 H16 3.2349 no . .
C20 H13 3.2165 no . .
C21 H5 2.9366 no . .
C21 H10 3.4220 no . .
C21 H11 2.5801 no . .
C21 H12 3.2248 no . .
C21 H14 3.2391 no . .
C22 H11 2.5018 no . .
C22 H12 3.2709 no . .
C22 H18 2.5917 no . .
C23 H4 3.5163 no . 3_645
C23 H19 3.2518 no . .
C24 H17 2.5753 no . .
C24 H20 3.2514 no . .
C26 H18 3.2512 no . .
C26 H21 2.5181 no . .
C26 H25 2.9394 no . .
C27 H4 3.2650 no . 3_645
C27 H19 3.2362 no . .
C27 H21 2.4896 no . .
C27 H22 3.1678 no . .
C27 H23 3.5652 no . .
C27 H25 2.9768 no . .
C28 H4 2.9103 no . 3_645
C28 H17 3.3151 no . .
C28 H18 3.2601 no . .
C28 H20 3.2652 no . .
C29 H20 2.5868 no . .
C30 H20 3.0191 no . .
C31 H1 3.2895 no . .
H1 H2 2.3070 no . .
H2 H3 2.3261 no . .
H3 H4 2.2976 no . .
H3 H12 2.9339 no . 3_655
H3 H13 3.3170 no . 3_655
H4 H12 2.9808 no . 3_655
H5 H6 3.4435 no . .
H5 H10 2.5040 no . .
H5 H11 2.5784 no . .
H5 H16 2.9094 no . .
H5 H23 2.7178 no . 3_655
H6 H7 2.3077 no . .
H7 H8 2.3198 no . .
H8 H9 2.3050 no . .
H9 H10 2.3124 no . .
H10 H11 2.6006 no . .
H10 H16 2.7056 no . .
H11 H12 3.5336 no . .
H11 H16 2.4129 no . .
H11 H17 2.2701 no . .
H12 H13 2.3131 no . .
H12 H23 3.5459 no . 3_655
H13 H14 2.2929 no . .
H13 H24 3.5304 no . 3_655
H14 H15 2.3055 no . .
H15 H16 2.3244 no . .
H17 H18 2.3730 no . .
H18 H19 2.2938 no . .
H19 H20 2.3362 no . .
H20 H21 2.0391 no . .
H20 H22 3.4822 no . .
H20 H24 3.4796 no . .
H20 H25 2.5493 no . .
H21 H23 2.8363 no . .
H21 H24 2.3681 no . .
H21 H25 2.3484 no . .
H22 H23 2.3482 no . .
H22 H24 2.3575 no . .
H22 H25 2.8187 no . .
Cu1 H30 2.4128 no . .
Cu1 H31 3.4324 no . .
O1 H30 2.5481 no . .
O1 H31 3.4592 no . .
O2 H30 2.5826 no . .
O4 H2 3.4706 no . 2_565
O4 H3 3.5939 no . 2_565
O6 H26 2.4123 no . 2_465
O6 H27 3.4579 no . 2_465
O7 H15 3.4750 no . 2_466
O7 H16 2.7920 no . 2_466
O7 H26 3.0658 no . 2_465
O7 H27 3.4670 no . 2_465
O7 H28 3.3592 no . 2_465
O8 H29 2.6689 no . 2_465
O8 H31 2.8952 no . 2_465
O9 H18 2.6798 no . 4_664
O10 H6 3.2430 no . 2_465
O10 H7 2.5167 no . 2_465
O10 H18 2.7369 no . 4_664
O10 H19 2.7170 no . 4_664
O10 H29 3.5944 no . 2_465
O10 H31 2.7140 no . 2_465
N1 H30 3.4808 no . .
N2 H14 3.5153 no . 2_566
N2 H30 3.4820 no . .
N3 H26 3.0726 no . 2_465
N4 H18 2.9928 no . 4_664
N4 H19 3.2769 no . 4_664
N4 H29 3.5404 no . 2_465
N4 H31 3.1882 no . 2_465
N5 H2 3.4109 no . 2_565
N5 H29 2.9941 no . .
N5 H30 3.0387 no . .
N6 H1 3.1829 no . 2_565
N6 H2 3.4684 no . 2_565
N6 H8 3.0514 no . 3_745
N6 H14 2.9422 no . 2_566
N6 H15 2.7401 no . 2_566
N6 H19 3.1235 no . 3_755
N6 H28 2.6403 no . 2_565
C1 H9 3.4693 no . 4_674
C1 H27 3.4766 no . 2_465
C1 H30 3.2861 no . .
C2 H9 3.1458 no . 4_674
C2 H26 3.3519 no . 2_465
C2 H27 3.3617 no . 2_465
C2 H29 3.1921 no . 2_465
C3 H8 3.3652 no . 4_674
C3 H9 3.1240 no . 4_674
C3 H26 3.5544 no . 2_465
C3 H27 3.1875 no . 2_465
C3 H29 3.2377 no . 2_465
C4 H9 3.4207 no . 4_674
C4 H21 3.2592 no . 2_465
C4 H27 3.0900 no . 2_465
C5 H27 3.1923 no . 2_465
C6 H27 3.4241 no . 2_465
C9 H13 3.5650 no . 2_566
C9 H14 3.4355 no . 2_566
C10 H14 3.4183 no . 2_566
C10 H31 3.3702 no . .
C11 H19 3.1430 no . 3_755
C12 H26 3.3553 no . 4_675
C12 H28 3.5651 no . 4_675
C13 H13 2.9267 no . 2_566
C14 H13 2.8944 no . 2_566
C15 H24 3.3222 no . 4_665
C16 H21 3.3286 no . 4_665
C16 H24 3.2224 no . 4_665
C17 H21 3.2770 no . 4_665
C18 H11 3.2314 no . 2_466
C18 H17 3.4445 no . 2_466
C18 H20 3.3461 no . 4_665
C18 H21 3.4505 no . 4_665
C19 H11 3.3099 no . 2_466
C19 H17 2.9381 no . 2_466
C19 H20 2.8724 no . 4_665
C20 H17 3.2635 no . 2_466
C20 H18 3.2804 no . 2_466
C20 H20 3.0347 no . 4_665
C20 H28 3.5123 no . 1_556
C21 H21 3.5577 no . 4_665
C21 H24 3.1215 no . 4_665
C21 H25 3.5068 no . 4_665
C22 H14 3.2471 no . 2_566
C22 H22 3.1434 no . 4_665
C22 H24 3.3417 no . 4_665
C23 H22 3.4530 no . 4_665
C24 H7 3.4203 no . 3_745
C24 H15 3.5228 no . 2_566
C24 H22 3.2289 no . 4_665
C25 H7 3.2130 no . 3_745
C25 H8 3.5447 no . 3_745
C25 H27 3.2501 no . 4_665
C25 H28 3.3347 no . 4_665
C26 H27 3.1441 no . 4_665
C26 H28 3.4080 no . 4_665
C27 H2 3.3914 no . 2_565
C28 H30 3.1631 no . .
C29 H3 3.0207 no . 2_565
C29 H17 3.1839 no . 4_664
C30 H17 3.2090 no . 4_664
C31 H2 3.3639 no . 2_565
C31 H19 3.5865 no . 4_664
C31 H29 2.8925 no . .
C31 H30 3.4922 no . .
C32 H8 3.5916 no . 4_674
C32 H19 3.5062 no . 4_664
C32 H29 3.3575 no . .
C33 H1 2.9900 no . 2_565
C33 H2 3.1375 no . 2_565
C33 H6 3.5406 no . .
C33 H14 3.4826 no . 2_566
C34 H1 3.3337 no . 2_565
C34 H2 3.2971 no . 2_565
C34 H6 3.2494 no . .
H1 N6 3.1829 no . 2_465
H1 C33 2.9900 no . 2_465
H1 C34 3.3337 no . 2_465
H1 H8 3.5336 no . 4_674
H1 H9 3.4720 no . 4_674
H1 H26 3.5028 no . 2_465
H1 H29 2.7584 no . 2_465
H2 O4 3.4706 no . 2_465
H2 N5 3.4109 no . 2_465
H2 N6 3.4684 no . 2_465
H2 C27 3.3914 no . 2_465
H2 C31 3.3639 no . 2_465
H2 C33 3.1375 no . 2_465
H2 C34 3.2971 no . 2_465
H2 H8 3.0451 no . 4_674
H2 H9 3.4447 no . 4_674
H2 H21 3.4119 no . 2_465
H2 H29 2.8425 no . 2_465
H2 H30 3.4164 no . 2_465
H3 O4 3.5939 no . 2_465
H3 C29 3.0207 no . 2_465
H3 H21 2.4106 no . 2_465
H3 H22 2.8429 no . 2_465
H3 H27 3.4989 no . 2_465
H6 O10 3.2430 no . 2_565
H6 C33 3.5406 no . .
H6 C34 3.2494 no . .
H6 H30 3.3710 no . .
H6 H31 2.5427 no . .
H7 O10 2.5167 no . 2_565
H7 C24 3.4203 no . 3_755
H7 C25 3.2130 no . 3_755
H7 H15 3.0926 no . 4_674
H7 H16 3.2181 no . 4_674
H7 H18 3.1703 no . 3_755
H7 H19 2.7896 no . 3_755
H8 N6 3.0514 no . 3_755
H8 C3 3.3652 no . 4_675
H8 C25 3.5447 no . 3_755
H8 C32 3.5916 no . 4_675
H8 H1 3.5336 no . 4_675
H8 H2 3.0451 no . 4_675
H8 H15 3.3775 no . 4_674
H8 H26 3.2910 no . 4_675
H8 H28 3.1250 no . 4_675
H9 C1 3.4693 no . 4_675
H9 C2 3.1458 no . 4_675
H9 C3 3.1240 no . 4_675
H9 C4 3.4207 no . 4_675
H9 H1 3.4720 no . 4_675
H9 H2 3.4447 no . 4_675
H9 H13 3.0203 no . 2_566
H9 H29 3.4866 no . 4_675
H9 H31 3.0876 no . 4_675
H10 H13 2.9782 no . 2_566
H10 H31 3.5045 no . 4_675
H11 C18 3.2314 no . 2_566
H11 C19 3.3099 no . 2_566
H11 H13 2.8954 no . 2_566
H11 H14 3.0363 no . 2_566
H11 H24 2.7231 no . 4_665
H13 C9 3.5650 no . 2_466
H13 C13 2.9267 no . 2_466
H13 C14 2.8944 no . 2_466
H13 H9 3.0203 no . 2_466
H13 H10 2.9782 no . 2_466
H13 H11 2.8954 no . 2_466
H14 N2 3.5153 no . 2_466
H14 N6 2.9422 no . 2_466
H14 C9 3.4355 no . 2_466
H14 C10 3.4183 no . 2_466
H14 C22 3.2471 no . 2_466
H14 C33 3.4826 no . 2_466
H14 H11 3.0363 no . 2_466
H14 H17 2.9060 no . 2_466
H14 H19 3.1682 no . 4_665
H14 H20 3.0080 no . 4_665
H15 O7 3.4750 no . 2_566
H15 N6 2.7401 no . 2_466
H15 C24 3.5228 no . 2_466
H15 H7 3.0926 no . 4_675
H15 H8 3.3775 no . 4_675
H15 H17 3.4389 no . 2_466
H15 H18 3.0791 no . 2_466
H15 H20 3.2638 no . 4_665
H15 H28 2.8408 no . 1_556
H16 O7 2.7920 no . 2_566
H16 H7 3.2181 no . 4_675
H16 H24 3.0361 no . 4_665
H16 H25 3.4920 no . 4_665
H17 C18 3.4445 no . 2_566
H17 C19 2.9381 no . 2_566
H17 C20 3.2635 no . 2_566
H17 C29 3.1839 no . 4_665
H17 C30 3.2090 no . 4_665
H17 H14 2.9060 no . 2_566
H17 H15 3.4389 no . 2_566
H17 H21 3.3152 no . 4_665
H17 H22 2.6587 no . 4_665
H17 H23 3.5232 no . 4_665
H17 H24 2.5698 no . 4_665
H18 O9 2.6798 no . 4_665
H18 O10 2.7369 no . 4_665
H18 N4 2.9928 no . 4_665
H18 C20 3.2804 no . 2_566
H18 H7 3.1703 no . 3_745
H18 H15 3.0791 no . 2_566
H18 H22 2.8133 no . 4_665
H19 O10 2.7170 no . 4_665
H19 N4 3.2769 no . 4_665
H19 N6 3.1235 no . 3_745
H19 C11 3.1430 no . 3_745
H19 C31 3.5865 no . 4_665
H19 C32 3.5062 no . 4_665
H19 H7 2.7896 no . 3_745
H19 H14 3.1682 no . 4_664
H19 H27 3.4025 no . 4_665
H19 H28 3.0649 no . 4_665
H20 C18 3.3461 no . 4_664
H20 C19 2.8724 no . 4_664
H20 C20 3.0347 no . 4_664
H20 H14 3.0080 no . 4_664
H20 H15 3.2638 no . 4_664
H20 H27 3.2556 no . 4_665
H20 H28 3.2202 no . 4_665
H21 C4 3.2592 no . 2_565
H21 C16 3.3286 no . 4_664
H21 C17 3.2770 no . 4_664
H21 C18 3.4505 no . 4_664
H21 C21 3.5577 no . 4_664
H21 H2 3.4119 no . 2_565
H21 H3 2.4106 no . 2_565
H21 H17 3.3152 no . 4_664
H22 C22 3.1434 no . 4_664
H22 C23 3.4530 no . 4_664
H22 C24 3.2289 no . 4_664
H22 H3 2.8429 no . 2_565
H22 H17 2.6587 no . 4_664
H22 H18 2.8133 no . 4_664
H23 H17 3.5232 no . 4_664
H24 C15 3.3222 no . 4_664
H24 C16 3.2224 no . 4_664
H24 C21 3.1215 no . 4_664
H24 C22 3.3417 no . 4_664
H24 H11 2.7231 no . 4_664
H24 H16 3.0361 no . 4_664
H24 H17 2.5698 no . 4_664
H25 C21 3.5068 no . 4_664
H25 H16 3.4920 no . 4_664
H25 H27 3.0255 no . 4_665
H25 H28 3.5300 no . 4_665
H26 O6 2.4123 no . 2_565
H26 O7 3.0658 no . 2_565
H26 N3 3.0726 no . 2_565
H26 C2 3.3519 no . 2_565
H26 C3 3.5544 no . 2_565
H26 C12 3.3553 no . 4_674
H26 H1 3.5028 no . 2_565
H26 H8 3.2910 no . 4_674
H26 H29 2.8696 no . .
H27 O6 3.4579 no . 2_565
H27 O7 3.4670 no . 2_565
H27 C1 3.4766 no . 2_565
H27 C2 3.3617 no . 2_565
H27 C3 3.1875 no . 2_565
H27 C4 3.0900 no . 2_565
H27 C5 3.1923 no . 2_565
H27 C6 3.4241 no . 2_565
H27 C25 3.2501 no . 4_664
H27 C26 3.1441 no . 4_664
H27 H3 3.4989 no . 2_565
H27 H19 3.4025 no . 4_664
H27 H20 3.2556 no . 4_664
H27 H25 3.0255 no . 4_664
H28 O7 3.3592 no . 2_565
H28 N6 2.6403 no . 2_465
H28 C12 3.5651 no . 4_674
H28 C20 3.5123 no . 1_554
H28 C25 3.3347 no . 4_664
H28 C26 3.4080 no . 4_664
H28 H8 3.1250 no . 4_674
H28 H15 2.8408 no . 1_554
H28 H19 3.0649 no . 4_664
H28 H20 3.2202 no . 4_664
H28 H25 3.5300 no . 4_664
H29 O8 2.6689 no . 2_565
H29 O10 3.5944 no . 2_565
H29 N4 3.5404 no . 2_565
H29 N5 2.9941 no . .
H29 C2 3.1921 no . 2_565
H29 C3 3.2377 no . 2_565
H29 C31 2.8925 no . .
H29 C32 3.3575 no . .
H29 H1 2.7584 no . 2_565
H29 H2 2.8425 no . 2_565
H29 H9 3.4866 no . 4_674
H29 H26 2.8696 no . .
H30 Cu1 2.4128 no . .
H30 O1 2.5481 no . .
H30 O2 2.5826 no . .
H30 N1 3.4808 no . .
H30 N2 3.4820 no . .
H30 N5 3.0387 no . .
H30 C1 3.2861 no . .
H30 C28 3.1631 no . .
H30 C31 3.4922 no . .
H30 H2 3.4164 no . 2_565
H30 H6 3.3710 no . .
H31 Cu1 3.4324 no . .
H31 O1 3.4592 no . .
H31 O8 2.8952 no . 2_565
H31 O10 2.7140 no . 2_565
H31 N4 3.1882 no . 2_565
H31 C10 3.3702 no . .
H31 H6 2.5427 no . .
H31 H9 3.0876 no . 4_674
H31 H10 3.5045 no . 4_674

#==============================================================================

#==============================================================================
# Additional structures and associated data_? identifiers
# should be added at this point if there is more than one 
# structure analysis in the CIF.

#==============================================================================
#     End of CIF
#==============================================================================


loop_
_refln_index_h
_refln_index_k
_refln_index_l
_refln_F_squared_meas
_refln_F_squared_sigma
_refln_F_squared_calc
_refln_observed_status
   2    0    0     57856.97      1357.45     56586.89 o
   4    0    0      4272.48       116.96      3910.00 o
   6    0    0     15235.76       441.74     15705.10 o
   8    0    0     13833.93       558.54     13435.13 o
  10    0    0      1127.98       156.02      1068.64 o
  12    0    0     13777.32       807.82     12739.64 o
  14    0    0      2972.94       326.47      2602.02 o
   2    1    0     32364.77       445.73     31822.99 o
   3    1    0      1587.88        42.51      1510.10 o
   4    1    0      1745.17        48.88      1677.72 o
   5    1    0      7457.20       166.41      8091.00 o
   6    1    0       506.47        50.34       468.72 o
   7    1    0     21539.69       479.78     22233.79 o
   8    1    0     13384.33       326.45     13483.85 o
   9    1    0      5825.38       252.14      5697.23 o
  10    1    0     13213.69       387.65     12705.80 o
  11    1    0      8209.24       321.14      7563.78 o
  12    1    0       434.14        90.34       304.15 o
  13    1    0      4103.24       233.65      3841.52 o
  15    1    0       353.66       110.66       332.70 o
   1    2    0     56499.30      1161.48     54681.15 o
   2    2    0      2169.29        38.47      2403.94 o
   3    2    0     24482.24       376.90     25033.57 o
   4    2    0     21222.69       355.93     22434.05 o
   5    2    0     11537.93       221.78     11664.00 o
   6    2    0       328.87        33.07       354.95 o
   7    2    0      3724.46       109.20      3603.60 o
   8    2    0       354.30        51.17       406.83 o
   9    2    0      1383.73       103.68      1106.89 o
  11    2    0      5676.64       228.15      5481.92 o
  12    2    0      5254.41       261.91      4893.00 o
  13    2    0      3188.74       213.75      3001.94 o
  14    2    0      1975.10       165.17      1799.46 o
  15    2    0      2971.06       515.81      3116.99 o
  16    2    0      3092.32       556.85      3324.68 o
  17    2    0      1178.22       385.06      2209.00 o
   1    3    0       220.99        19.44       235.62 o
   2    3    0     11753.31       160.42     11653.20 o
   3    3    0      1206.74        45.42      1234.82 o
   4    3    0      4812.63       102.65      5368.49 o
   5    3    0       737.15        54.19       677.56 o
   6    3    0     30102.81       638.83     32037.42 o
   7    3    0      2648.34        88.54      2405.90 o
   8    3    0     36428.34       834.11     36286.44 o
   9    3    0      2959.82       117.94      2885.84 o
  10    3    0      6120.56       250.37      5856.84 o
  12    3    0      8792.94       332.36      8019.20 o
  14    3    0     13126.81       567.73     12791.61 o
  15    3    0       319.57       111.34       410.06 o
   0    4    0       234.49        25.82       292.75 o
   1    4    0       277.96        24.10       230.43 o
   2    4    0     26615.90       432.28     26591.82 o
   3    4    0     32358.58       575.68     32688.64 o
   4    4    0     12038.55       237.86     13059.92 o
   5    4    0      2657.20        81.60      2571.50 o
   6    4    0      8906.24       204.59      8740.38 o
   8    4    0      1750.93        80.63      1743.06 o
   9    4    0       981.66        72.24      1065.37 o
  10    4    0       615.56        70.86       606.14 o
  11    4    0       261.58        55.10       228.01 o
  12    4    0       132.49        58.62       105.06 o
  13    4    0       748.40       108.26       782.32 o
  14    4    0      3480.78       253.77      3529.55 o
  15    4    0      3659.65       408.02      3750.34 o
  16    4    0      5679.23       560.14      5989.21 o
  17    4    0      1794.39       543.71      1907.07 o
   1    5    0      2544.89        53.81      2179.96 o
   2    5    0     25935.40       520.92     25763.46 o
   3    5    0      2423.13        57.59      2513.02 o
   5    5    0     14393.97       322.02     14991.55 o
   6    5    0       297.22        39.75       437.65 o
   7    5    0     18043.04       476.09     18171.04 o
   8    5    0      5137.83       199.79      4953.34 o
   9    5    0     15376.25       379.77     14908.41 o
  10    5    0      9151.47       299.56      9269.84 o
  11    5    0     11675.10       386.69     11521.88 o
  13    5    0      7745.20       405.81      7404.60 o
  14    5    0       635.36       103.22       689.59 o
  15    5    0      1167.62       129.34      1534.29 o
  16    5    0       388.79       169.63       459.24 o
   0    6    0     23008.30       647.24     23891.88 o
   1    6    0     11978.22       203.37     10901.45 o
   2    6    0     28587.96       558.55     28571.14 o
   3    6    0      6201.59       111.11      6201.56 o
   4    6    0      2201.46        64.58      2335.79 o
   5    6    0      1312.98        48.63      1531.94 o
   7    6    0      3607.79       128.15      3512.93 o
   8    6    0      2199.85       125.89      2120.60 o
   9    6    0       452.98        59.32       403.61 o
  10    6    0      3605.72       200.43      3252.42 o
  11    6    0       286.05        68.09       386.12 o
  12    6    0     12407.57       513.63     12221.30 o
  13    6    0       684.86        88.25       781.20 o
  14    6    0      2217.64       586.62      2956.10 o
  15    6    0       458.12       166.46       792.99 o
  16    6    0       558.88       239.17       772.28 o
   1    7    0       547.54        36.23       567.87 o
   2    7    0     26347.11       441.26     26735.52 o
   3    7    0      6766.73       152.86      7308.54 o
   4    7    0     10936.11       197.92     11185.18 o
   5    7    0      5374.83       158.94      5163.86 o
   6    7    0      9072.64       229.44      8790.94 o
   7    7    0      1775.49       100.05      1772.41 o
   8    7    0     11087.77       380.46     11344.38 o
   9    7    0      7035.43       259.77      6988.96 o
  10    7    0     26324.78      1205.97     27768.89 o
  11    7    0      4475.01       181.85      4448.89 o
  12    7    0      1560.58       154.97      1791.83 o
   0    8    0     21338.15       673.57     21972.13 o
   1    8    0     30926.31       635.41     30436.29 o
   2    8    0      3734.97        75.71      3326.98 o
   3    8    0     21318.04       371.80     20805.18 o
   4    8    0      7618.53       162.19      7363.36 o
   5    8    0      7073.00       147.60      7459.78 o
   6    8    0       294.26        31.29       320.41 o
   7    8    0      2418.05       123.53      2442.34 o
   8    8    0      2382.65       100.78      2394.14 o
  10    8    0       420.62        75.51       491.95 o
  11    8    0      2362.53       137.15      2424.58 o
  12    8    0       334.51        80.56       400.40 o
  13    8    0      1881.43       198.52      2167.83 o
  15    8    0      2320.91       709.53      3272.98 o
   1    9    0      3497.04       101.75      3274.13 o
   2    9    0       953.83        44.64       702.78 o
   3    9    0       581.89        36.52       722.00 o
   4    9    0     14266.27       234.28     14529.89 o
   5    9    0      2766.51        76.02      2628.61 o
   6    9    0     23888.24       489.31     24000.21 o
   7    9    0      3018.14       120.99      3039.32 o
   8    9    0      3406.07       156.65      3553.35 o
   9    9    0      6656.78       387.45      6985.62 o
  10    9    0      2918.77       206.36      3184.34 o
  11    9    0      5392.50       323.45      6085.56 o
  12    9    0      2993.61       254.17      3579.63 o
  13    9    0       338.93       147.61      1278.06 o
  14    9    0      1885.91       572.35      1971.36 o
   0   10    0      2748.44       117.26      2759.40 o
   2   10    0     18293.50       395.61     18130.62 o
   3   10    0      5550.31       138.44      5774.48 o
   4   10    0     58404.54      1355.54     57552.01 o
   5   10    0      2347.51       133.38      2603.04 o
   6   10    0      4862.89       251.96      4533.33 o
   7   10    0       639.70        85.29       786.80 o
   8   10    0      1698.06       178.67      1880.96 o
   9   10    0       757.85        68.21      1067.98 o
  10   10    0       683.96        64.80       827.71 o
  11   10    0       596.92        95.84       838.10 o
   1   11    0      2517.19       103.59      2420.64 o
   2   11    0      1758.14        73.59      1720.59 o
   3   11    0      2694.59        75.02      2422.61 o
   4   11    0       142.17        18.46       158.51 o
   5   11    0     21504.35       777.11     21045.30 o
   6   11    0      4203.04       243.17      3951.38 o
   7   11    0     15564.57       575.27     14602.31 o
   8   11    0      3937.43       254.79      4131.92 o
   9   11    0      9648.54       479.98      9264.06 o
  11   11    0      3204.30       385.68      4581.94 o
   0   12    0     13468.07       431.30     12977.77 o
   1   12    0      3386.01       122.14      2945.23 o
   2   12    0      6142.12       186.08      5565.16 o
   3   12    0      8381.62       236.28      7926.34 o
   4   12    0      3680.49       215.03      3333.91 o
   5   12    0      1797.31       189.65      1658.93 o
   6   12    0      1715.12       219.47      1713.96 o
   7   12    0       931.64       117.64       972.82 o
   8   12    0      1596.12       394.56      1789.29 o
   1   13    0      2281.29       123.27      2022.30 o
   2   13    0      8038.66       283.84      7546.40 o
   3   13    0       438.45        50.44       435.97 o
   4   13    0     15685.01       668.00     14733.10 o
   6   13    0      3665.89       254.19      3568.87 o
   8   13    0     17964.55       890.16     16734.01 o
   9   13    0       499.53       143.05       595.36 o
  10   13    0     13833.93      1072.55     11796.13 o
   0   14    0     14818.16       552.93     13905.13 o
   1   14    0     17297.47       439.00     16455.76 o
   2   14    0      9062.81       301.38      8682.51 o
   3   14    0      1393.99        80.94      1181.30 o
   4   14    0      1103.84       168.06      1042.00 o
   5   14    0       289.56        94.86       422.30 o
   6   14    0       549.96       109.75       590.00 o
   7   14    0      1955.27       238.89      1736.39 o
   9   14    0      1408.16       213.06      1636.20 o
  10   14    0       533.94       221.05       711.29 o
   1   15    0      1334.26        96.79      1338.10 o
   3   15    0      4750.76       166.03      4783.11 o
   4   15    0      2907.63       261.63      2702.96 o
   5   15    0      2296.10       270.42      2034.01 o
   6   15    0      6034.72       470.48      5415.49 o
   7   15    0      3376.01       393.88      2955.01 o
   9   15    0      8527.16       851.60      8408.89 o
   0   16    0      5838.52       289.23      5327.54 o
   1   16    0       588.54        76.80       359.86 o
   2   16    0      7174.65       271.07      6957.23 o
   4   16    0      7660.64       545.14      6696.15 o
   6   16    0      1335.52       216.30      1280.21 o
   7   16    0       537.92       133.28       423.95 o
   1   17    0      1094.71       113.85       922.34 o
   2   17    0       525.23        66.25       528.08 o
   4   17    0       765.44       243.72       630.01 o
   5   17    0      4691.65       386.55      4651.24 o
   6   17    0      6434.07       601.73      5557.70 o
   7   17    0      4154.10       363.73      3766.28 o
   0   18    0      2391.05       787.48      2224.07 o
   1   18    0      3847.26       230.52      3804.42 o
   2   18    0       765.44       145.66       705.43 o
   3   18    0     10294.46       586.56      8837.88 o
   5   18    0      6040.06       596.38      5483.40 o
   2   19    0      2499.96       304.54      2466.12 o
   4   19    0      2572.74       308.94      2519.04 o
   5   19    0      1150.04       211.22      1142.44 o
   6   19    0      3954.72       452.28      3531.92 o
   0   20    0      8948.51      1341.14      7616.05 o
   1   20    0      4679.87       814.51      3946.35 o
   2   20    0      5504.26       428.90      5214.28 o
   2    0    1      1451.10        23.60      1568.16 o
   3    0    1     14784.67       205.02     14803.59 o
   4    0    1      6220.58       122.13      6339.34 o
   5    0    1     11171.26       196.40     10766.14 o
   6    0    1     15996.84       330.77     16532.82 o
   7    0    1     16368.92       378.62     16427.55 o
   8    0    1     21575.05       510.50     21629.58 o
  10    0    1      7203.83       236.57      7235.20 o
  11    0    1      6494.94       249.59      5899.78 o
  12    0    1      5189.76       304.92      4883.21 o
  13    0    1      6826.30       307.06      5811.01 o
  14    0    1      1959.84       210.23      2062.07 o
  15    0    1       514.25       116.27       395.61 o
  16    0    1       342.10       137.48       356.83 o
  17    0    1      1078.83       237.35      1245.38 o
 -17    1    1      1587.88       400.40      1649.17 o
 -16    1    1       877.82       239.59      1096.93 o
 -15    1    1       607.90       127.26       696.43 o
 -14    1    1      1819.26       161.45      1697.44 o
 -13    1    1      1946.15       173.06      1686.74 o
 -12    1    1      1609.90       128.41      1388.31 o
 -11    1    1      5395.03       232.53      4995.66 o
 -10    1    1      3674.23       198.16      3404.72 o
  -9    1    1     11582.33       348.12     10995.62 o
  -8    1    1      7549.60       209.30      7284.62 o
  -7    1    1       594.40        54.53       585.64 o
  -6    1    1      8527.16       219.26      8875.52 o
  -5    1    1     11339.20       241.84     11573.46 o
  -4    1    1      5049.42       105.15      5350.92 o
  -3    1    1      9975.75       161.54     10412.16 o
  -2    1    1     17592.90       196.26     17750.23 o
   2    1    1     16838.93       183.08     16913.00 o
   3    1    1      9075.91       131.13      9496.50 o
   4    1    1      5244.44       102.17      5530.90 o
   5    1    1     10554.45       205.04     10922.34 o
   6    1    1      8994.14       176.23      9465.34 o
   7    1    1       540.32        47.99       611.08 o
   8    1    1      7412.69       234.05      7277.80 o
   9    1    1     11357.53       322.72     11069.14 o
  10    1    1      4367.47       186.48      3918.76 o
  11    1    1      5752.07       227.06      5342.15 o
  12    1    1      1443.24       167.33      1343.96 o
  13    1    1      1732.26       170.43      1663.01 o
  14    1    1      1768.25       186.66      1688.39 o
  15    1    1       693.89       118.75       784.00 o
  16    1    1       871.72       277.36      1162.13 o
  17    1    1      1223.53       349.07      1481.48 o
 -17    2    1       445.69       124.23       538.70 o
 -16    2    1       579.40       184.71       938.20 o
 -15    2    1      1224.74       262.53      1307.55 o
 -14    2    1      3591.27       222.71      3322.37 o
 -13    2    1      4076.84       228.50      4139.64 o
 -12    2    1      5483.85       290.50      5267.86 o
 -11    2    1      7200.91       289.09      6857.50 o
 -10    2    1      5039.64       202.76      5035.32 o
  -9    2    1     13943.42       414.46     14025.66 o
  -8    2    1      1099.27        79.86      1278.78 o
  -7    2    1     12565.22       324.01     13039.36 o
  -6    2    1      5878.03       168.85      6369.64 o
  -5    2    1     24790.11       520.13     25969.32 o
  -4    2    1      1206.74        72.92      1097.60 o
  -3    2    1     55028.53      1089.75     54620.36 o
  -2    2    1     11873.00       142.48     11944.30 o
  -1    2    1      1899.38        41.99      1930.72 o
   1    2    1      2273.08        21.33      2214.64 o
   2    2    1      9313.48       195.93      9584.41 o
   3    2    1     52926.00      1044.98     52647.30 o
   4    2    1      1903.88        61.56      1907.94 o
   5    2    1     23034.40       386.47     24183.36 o
   6    2    1      5867.48       134.43      6326.61 o
   7    2    1     13130.76       299.68     13677.30 o
   8    2    1      1172.32        73.05      1234.82 o
   9    2    1     14008.51       370.63     14028.03 o
  10    2    1      4836.53       203.42      4992.84 o
  11    2    1      7029.66       285.63      6549.66 o
  12    2    1      5314.45       238.32      5082.26 o
  13    2    1      4107.65       255.83      4094.72 o
  14    2    1      2902.07       200.21      2880.47 o
  15    2    1      1098.13       230.35      1204.09 o
  16    2    1       913.87       161.24       964.10 o
  17    2    1       526.81       172.97       536.39 o
 -16    3    1       671.42       140.88       877.34 o
 -15    3    1       847.50       156.28      1020.80 o
 -14    3    1      2389.37       200.17      2263.86 o
 -13    3    1     10480.34       465.01      9882.35 o
 -12    3    1      1514.70       139.28      1292.40 o
 -11    3    1      3035.18       176.31      2684.28 o
 -10    3    1      1004.43        83.98       858.49 o
  -9    3    1      2639.50       129.06      2662.56 o
  -8    3    1      2632.43       127.12      2595.90 o
  -7    3    1     16763.10       454.44     17854.30 o
  -6    3    1       772.12        53.55       724.69 o
  -5    3    1     33595.81       712.72     34581.12 o
  -4    3    1      5066.55       102.87      4947.72 o
  -3    3    1     35456.31       667.40     34529.07 o
  -2    3    1     42835.16       883.13     42662.90 o
  -1    3    1      1927.98        37.77      2061.16 o
   0    3    1     53640.89       988.26     51933.85 o
   1    3    1      1520.06        42.93      1648.36 o
   2    3    1     46685.53       721.21     46014.54 o
   3    3    1     36711.30       646.14     35751.25 o
   4    3    1      3354.05       159.43      3298.20 o
   5    3    1     35820.09       722.91     36894.73 o
   6    3    1       675.88        36.68       674.44 o
   7    3    1     16470.34       322.38     17675.70 o
   8    3    1      2623.61       103.99      2513.02 o
   9    3    1      3003.03       113.14      3045.94 o
  10    3    1      1017.56        88.91       901.80 o
  11    3    1      3811.06       182.69      3407.06 o
  12    3    1      1353.18       121.52      1245.38 o
  13    3    1     10200.41       413.58      9459.51 o
  14    3    1      2744.83       200.12      2732.15 o
  15    3    1      1244.08       150.50      1163.49 o
  16    3    1       966.62       148.71       812.25 o
 -17    4    1      1393.99       409.85      1612.02 o
 -16    4    1       872.73       150.45       840.42 o
 -15    4    1      7811.97       425.80      7647.50 o
 -14    4    1      1856.14       169.01      1649.98 o
 -13    4    1       585.21       119.87       645.16 o
 -12    4    1      2324.22       185.81      2268.62 o
 -11    4    1      1620.96       123.30      1506.99 o
 -10    4    1      6623.13       246.44      6119.93 o
  -9    4    1      5020.12       270.63      5343.61 o
  -8    4    1      6659.59       224.65      6360.06 o
  -7    4    1      1581.03        91.67      1599.20 o
  -6    4    1      6897.57       202.91      7093.01 o
  -5    4    1     16390.94       334.82     16772.84 o
  -4    4    1      8773.59       164.38      9401.24 o
  -3    4    1      8847.88       139.18      9547.24 o
  -2    4    1     16066.55       331.49     16134.08 o
  -1    4    1     35813.58       573.07     34733.78 o
   0    4    1      3003.03        56.57      2911.68 o
   1    4    1     37068.20       689.02     36073.40 o
   2    4    1     17211.59       302.47     17213.44 o
   3    4    1     10554.45       162.62     11022.90 o
   4    4    1      8754.27       144.88      9545.29 o
   5    4    1     14377.46       272.32     14949.95 o
   6    4    1      6772.39       203.89      6855.84 o
   7    4    1      2159.69        79.96      2054.81 o
   8    4    1      6131.33       175.14      6010.90 o
   9    4    1      4952.08       167.09      5178.24 o
  10    4    1      6107.11       193.62      5890.56 o
  11    4    1      1524.09       133.00      1361.61 o
  12    4    1      1935.54       157.45      2008.83 o
  13    4    1       941.12        93.95       874.98 o
  14    4    1      1811.93       156.73      1958.06 o
  15    4    1      7805.89       601.97      7609.07 o
  16    4    1       940.06       198.35       912.64 o
  17    4    1      1234.39       351.82      1509.32 o
 -15    5    1      2544.89       317.68      2648.13 o
 -14    5    1      3745.49       259.04      3456.26 o
 -13    5    1      1476.11       142.79      1358.66 o
 -12    5    1      5061.65       217.89      4701.84 o
 -11    5    1      5759.91       242.88      5823.22 o
 -10    5    1      4360.65       165.88      4446.22 o
  -9    5    1      9010.47       346.24      8790.94 o
  -8    5    1     10051.51       282.90      9759.46 o
  -7    5    1      1274.61        74.94      1278.78 o
  -6    5    1     11637.95       252.43     12250.06 o
  -5    5    1      4461.21       128.71      4486.32 o
  -4    5    1      3954.72        86.56      3928.78 o
  -3    5    1     24866.02       558.91     24645.86 o
  -2    5    1      5739.03       156.41      5750.19 o
  -1    5    1     28211.03       497.06     28561.00 o
   0    5    1       493.39        26.75       537.31 o
   1    5    1     30920.26       568.79     31321.92 o
   2    5    1      6542.17       136.38      6557.76 o
   3    5    1     23909.52       441.64     24096.35 o
   4    5    1      4000.30        89.23      3956.41 o
   5    5    1      5599.12       118.45      5425.80 o
   6    5    1     11372.20       253.20     12179.33 o
   7    5    1      1205.55        93.19      1110.89 o
   8    5    1      8802.63       229.23      8817.21 o
   9    5    1      9098.88       242.90      9093.53 o
  10    5    1      4022.09       168.04      4281.08 o
  11    5    1      5640.40       245.52      5719.90 o
  12    5    1      4860.49       263.90      4916.81 o
  13    5    1      1809.00       166.85      1676.08 o
  14    5    1      3177.09       273.49      3386.08 o
  15    5    1      2746.64       580.71      2916.00 o
 -13    6    1      1256.25       132.94      1041.35 o
 -12    6    1      2491.36       164.89      2377.54 o
 -11    6    1      7799.81       340.38      7359.92 o
 -10    6    1      4216.43       252.49      4202.93 o
  -9    6    1      2987.97       131.67      3084.69 o
  -8    6    1      7365.36       251.02      7082.91 o
  -7    6    1      4182.98       151.34      4269.32 o
  -6    6    1      7696.82       211.33      7480.52 o
  -5    6    1      2022.80        63.45      1974.91 o
  -4    6    1     23464.65       537.66     23161.80 o
  -3    6    1      9668.83       253.77      9490.66 o
  -2    6    1      4129.74        64.13      4065.34 o
  -1    6    1     19658.48       361.86     20629.58 o
   0    6    1     22982.21       354.74     22329.32 o
   1    6    1     19987.93       442.72     21257.64 o
   2    6    1      4966.62       104.28      4971.66 o
   3    6    1     10113.71       207.64     10048.06 o
   4    6    1     22857.18       343.36     23173.97 o
   5    6    1      1506.67        76.14      1654.86 o
   6    6    1      8029.40       194.26      7873.01 o
   7    6    1      4468.10       149.51      4649.88 o
   8    6    1      6957.71       221.02      6819.46 o
   9    6    1      2680.31       133.61      2922.48 o
  10    6    1      4035.20       179.24      4149.94 o
  11    6    1      7775.51       257.92      7763.37 o
  12    6    1      2107.23       137.43      2405.90 o
  13    6    1       934.79        93.64       967.83 o
  14    6    1       497.99        81.40       638.07 o
 -13    7    1       872.73       121.99       966.59 o
 -12    7    1       837.52       212.12       875.57 o
 -11    7    1      5044.53       259.07      4733.44 o
 -10    7    1      9148.18       401.54      9212.16 o
  -9    7    1     12704.47       426.65     12591.08 o
  -8    7    1      1761.02       105.42      1888.77 o
  -7    7    1     10061.86       241.62      9862.48 o
  -6    7    1      1414.63        62.12      1521.00 o
  -5    7    1      1958.32       102.03      1992.73 o
  -4    7    1     23464.65       579.83     23823.92 o
  -3    7    1     20972.78       468.44     21022.10 o
  -2    7    1     21894.66       356.42     21225.58 o
  -1    7    1     19730.92       372.19     19943.09 o
   0    7    1     12603.82       251.11     12459.02 o
   1    7    1     17456.24       400.09     17929.21 o
   2    7    1     23338.31       504.67     22813.08 o
   3    7    1     20354.47       466.40     20460.44 o
   4    7    1     23989.40       501.00     24379.70 o
   5    7    1      2627.13        79.37      2820.67 o
   6    7    1      1326.73       112.81      1279.49 o
   7    7    1      8896.50       246.67      8847.28 o
   8    7    1      1596.12        97.61      1836.98 o
   9    7    1     12646.36       367.63     12943.61 o
  10    7    1      8221.72       258.98      8710.49 o
  11    7    1      4374.30       184.35      4344.13 o
  12    7    1       612.15        70.67       768.95 o
  13    7    1       651.94       116.86       802.02 o
 -14    8    1      1173.50       338.32      1733.89 o
 -13    8    1      1647.39       227.66      1891.38 o
 -12    8    1       727.84       156.89       736.58 o
 -11    8    1      5000.63       343.11      4858.09 o
  -9    8    1      6228.72       258.00      6331.38 o
  -8    8    1      1614.04        74.65      1675.26 o
  -7    8    1     14489.08       364.51     14888.88 o
  -6    8    1      1961.36       140.21      1768.20 o
  -5    8    1      4052.70       133.63      3984.13 o
  -4    8    1      6713.05       203.00      6539.96 o
  -3    8    1     11734.67       369.04     11528.32 o
  -2    8    1     16145.16       266.72     15911.30 o
  -1    8    1     13336.60       290.10     13347.18 o
   0    8    1     29656.69       634.08     29217.06 o
   1    8    1     14139.14       270.06     13957.06 o
   2    8    1     14659.41       354.14     14713.69 o
   3    8    1     10717.69       245.81     11006.11 o
   4    8    1      6883.28       188.43      6684.70 o
   5    8    1      3751.81       115.93      3691.78 o
   6    8    1      2435.00       113.77      2492.01 o
   7    8    1     15423.22       418.81     16197.65 o
   8    8    1      1682.50       105.86      1860.20 o
   9    8    1      6570.03       273.34      6326.61 o
  10    8    1       180.57        43.47       177.96 o
  11    8    1      4200.81       265.41      4401.00 o
  12    8    1       631.03       133.12       815.10 o
 -14    9    1       559.69       170.96      1060.80 o
 -13    9    1      1987.36       593.68      3423.42 o
 -12    9    1      1589.25       181.08      1546.06 o
 -11    9    1       965.55       166.81       749.66 o
 -10    9    1      5478.76       809.97      5858.37 o
  -9    9    1      2250.17       218.73      2059.34 o
  -8    9    1      2868.80       217.49      2690.50 o
  -7    9    1     11742.12       488.48     11707.24 o
  -6    9    1      2952.33       164.54      2818.55 o
  -5    9    1     12719.99       395.86     12676.51 o
  -4    9    1      7528.69       319.48      7253.93 o
  -3    9    1      6362.51       208.61      6184.25 o
  -2    9    1     14977.76       269.53     15040.57 o
  -1    9    1     15641.94       301.26     15089.67 o
   0    9    1      3374.01       101.94      3415.23 o
   1    9    1     15573.16       322.07     15097.04 o
   2    9    1     13468.07       283.54     13792.15 o
   3    9    1      6458.94       210.18      6228.37 o
   4    9    1      8203.01       230.63      8085.61 o
   5    9    1     12235.68       315.93     12467.96 o
   6    9    1      3044.66       127.22      3125.93 o
   7    9    1     11489.93       287.71     11312.45 o
   8    9    1      3031.39       145.89      3115.87 o
   9    9    1      1851.69       121.42      2034.01 o
  10    9    1      5532.38       202.20      6021.76 o
  11    9    1       522.08       110.08       564.06 o
  12    9    1      1206.74       417.19      1602.40 o
  13    9    1      3069.40       526.18      3707.59 o
 -10   10    1      5227.01       562.26      5257.70 o
  -9   10    1      1665.60       158.70      1631.35 o
  -8   10    1      4261.24       307.74      4036.06 o
  -7   10    1      1335.52       114.44      1183.36 o
  -6   10    1      6373.49       291.20      6507.65 o
  -5   10    1     12476.66       565.02     11653.20 o
  -4   10    1      6425.79       256.54      6149.70 o
  -3   10    1     25957.58       814.99     25805.21 o
  -2   10    1      1609.90        52.47      1677.72 o
  -1   10    1      2588.47       115.55      2455.20 o
   0   10    1       372.01        41.15       395.21 o
   1   10    1      2734.03       106.16      2663.59 o
   2   10    1      1476.11        71.39      1493.82 o
   3   10    1     26179.81       551.21     25606.40 o
   4   10    1      6220.58       192.70      5986.12 o
   5   10    1     11985.75       290.08     11870.10 o
   6   10    1      6949.11       218.01      7052.64 o
   7   10    1      1303.02        79.50      1182.67 o
   8   10    1      3950.40       177.35      3985.40 o
   9   10    1      1428.90       100.16      1515.54 o
  10   10    1      3976.39       297.28      4648.51 o
  11   10    1       128.17        29.22       240.87 o
 -11   11    1       203.45        66.75       171.61 o
 -10   11    1      3676.32       402.68      3263.84 o
  -8   11    1      6029.37       478.29      6580.45 o
  -7   11    1      3396.03       306.82      3122.57 o
  -6   11    1      7186.32       326.72      6915.59 o
  -5   11    1      7090.38       312.94      6645.51 o
  -4   11    1      6302.26       286.84      5700.25 o
  -3   11    1      5020.12       270.63      4999.90 o
  -2   11    1      1224.74        62.62      1109.56 o
  -1   11    1      5319.47       155.61      5324.62 o
   0   11    1      3364.02       167.65      3166.31 o
   1   11    1      5088.62       184.10      5113.68 o
   2   11    1      1100.41        82.19       919.30 o
   3   11    1      5841.15       194.62      5655.04 o
   4   11    1      6326.87       169.70      5945.95 o
   5   11    1      6983.57       241.56      7054.32 o
   6   11    1      7639.57       306.79      7719.38 o
   7   11    1      2881.71       171.79      2857.97 o
   8   11    1      6806.42       264.02      6802.95 o
  10   11    1      3255.15       638.07      2898.75 o
  12   11    1      1178.22       454.75      2894.44 o
 -13   12    1      2088.32       946.66      2541.17 o
 -12   12    1       518.16       234.99       813.96 o
 -11   12    1      4677.52      1044.94      4249.74 o
 -10   12    1      1257.47       241.61      1019.52 o
  -9   12    1      3976.39       236.52      3842.76 o
  -8   12    1      3728.66       208.02      3267.27 o
  -7   12    1      5314.45       311.07      5048.10 o
  -6   12    1      5137.83       261.45      4794.18 o
  -5   12    1      3296.50       215.35      3128.16 o
  -4   12    1      8938.75       422.94      8302.85 o
  -3   12    1       352.36        38.11       357.21 o
  -2   12    1      5037.20       127.00      4895.80 o
  -1   12    1     10508.54       306.90     10144.52 o
   1   12    1     10771.20       310.71     10397.88 o
   2   12    1      3832.34       164.03      3548.58 o
   3   12    1       613.00        55.38       553.66 o
   4   12    1      8571.71       235.76      8337.52 o
   5   12    1      2874.33        83.02      3124.81 o
   6   12    1      4509.60       258.81      4290.25 o
   7   12    1      5179.85       272.43      5062.32 o
   8   12    1      2716.06       175.75      2737.38 o
   9   12    1      3364.02       235.51      3567.67 o
  11   12    1      5241.95       570.54      4265.40 o
 -11   13    1      7136.81       683.16      5783.60 o
 -10   13    1       640.57       138.48       604.18 o
  -9   13    1     12895.23       648.67     11837.44 o
  -8   13    1       261.58       117.99        61.15 o
  -7   13    1      3772.92       281.12      3527.17 o
  -6   13    1      1262.35       157.72      1166.22 o
  -5   13    1      5759.91       381.30      5453.82 o
  -4   13    1      4846.11       330.58      4668.99 o
  -3   13    1      5540.06       148.55      5659.55 o
  -2   13    1      8378.47       223.64      7983.42 o
  -1   13    1      4035.20       157.39      3876.31 o
   0   13    1      7733.09       272.35      7432.16 o
   1   13    1      4484.22       186.65      4411.62 o
   2   13    1      8476.40       262.96      8137.84 o
   3   13    1      5668.86       176.18      5545.78 o
   4   13    1      4196.35       144.89      4094.72 o
   5   13    1      5596.55       329.51      5493.77 o
   6   13    1      1351.92       193.58      1412.26 o
   7   13    1      4401.65       292.23      3898.75 o
   9   13    1     11493.62       815.31     11942.12 o
  11   13    1      7044.09       742.24      5873.69 o
 -12   14    1      1388.86       619.41      1672.81 o
 -11   14    1      1359.52       586.19      1615.24 o
 -10   14    1       904.53       162.48      1407.75 o
  -9   14    1      3217.95       302.57      3295.91 o
  -8   14    1      2217.64       275.48      2223.12 o
  -7   14    1      4553.62       482.99      4622.64 o
  -6   14    1      1643.21       242.71      1528.03 o
  -5   14    1      3933.11       302.13      3855.17 o
  -4   14    1      2148.51       199.38      1958.95 o
  -3   14    1      5113.20       374.02      4817.75 o
  -2   14    1      1625.12        84.62      1624.90 o
  -1   14    1      4860.49       208.72      4599.55 o
   0   14    1     12117.97       340.92     11748.39 o
   1   14    1      4971.47       206.23      4722.44 o
   2   14    1      1187.69        88.94      1310.44 o
   3   14    1      5550.31       169.20      5343.61 o
   4   14    1      1379.90        71.58      1517.10 o
   5   14    1      3701.40       328.69      3628.86 o
   6   14    1      1893.39       230.59      1550.78 o
   7   14    1      5108.28       368.92      4798.33 o
   8   14    1      2035.20       277.88      2153.89 o
   9   14    1      2939.26       264.92      3446.86 o
 -10   15    1      7588.52      1465.85      6573.97 o
  -8   15    1      2909.49       321.11      2717.54 o
  -7   15    1      1897.88       250.35      1721.42 o
  -6   15    1      1427.60       266.54      1210.34 o
  -5   15    1      5020.12       480.31      4568.41 o
  -4   15    1      4562.91       299.86      4167.99 o
  -3   15    1      6544.95       361.91      6009.35 o
  -2   15    1      3766.58       120.38      3739.32 o
  -1   15    1      4000.30       139.29      3795.79 o
   0   15    1       183.82        50.85       148.35 o
   1   15    1      3751.81       155.97      3639.71 o
   2   15    1      3382.01       164.10      3227.38 o
   3   15    1      5619.74       237.33      5683.65 o
   4   15    1      3570.68       240.58      3808.12 o
   5   15    1      5922.96       338.98      5371.42 o
   6   15    1      1299.30       157.53      1210.34 o
   7   15    1      1828.08       182.44      1723.08 o
   8   15    1      3436.26       367.13      2981.16 o
   9   15    1       596.08       242.80       242.11 o
  10   15    1      7154.27       954.68      6416.01 o
 -10   16    1      2196.62       604.80      2175.29 o
  -8   16    1      4694.01       396.08      4106.25 o
  -6   16    1      2581.48       267.50      2190.24 o
  -5   16    1      1790.02       257.69      1763.16 o
  -4   16    1      2922.49       327.41      2480.04 o
  -3   16    1     10469.77       580.97      9633.42 o
  -2   16    1       607.05        52.57       587.58 o
  -1   16    1      3105.73       174.51      2950.66 o
   0   16    1      1806.07       124.30      1542.13 o
   1   16    1      3105.73       180.26      2780.45 o
   2   16    1       504.15        61.04       479.17 o
   3   16    1      9927.70       325.72      9950.06 o
   4   16    1      2475.93       294.51      2359.04 o
   5   16    1      1993.50       275.02      1771.57 o
   6   16    1      2355.85       349.08      2120.60 o
   8   16    1      4874.90       557.41      3711.25 o
  10   16    1      3875.06       559.09      2729.02 o
  -6   17    1      4834.14       495.26      4349.40 o
  -5   17    1      4151.88       354.77      3604.80 o
  -4   17    1      1099.27       185.97      1096.27 o
  -3   17    1      1309.24       183.03      1458.48 o
  -2   17    1      2429.91       178.11      2885.84 o
  -1   17    1      2687.44       180.17      2545.20 o
   0   17    1      3560.41       209.44      3820.48 o
   1   17    1      2993.61       163.80      2724.84 o
   2   17    1      2527.56       152.24      2612.23 o
   3   17    1      1137.24       121.85      1516.32 o
   4   17    1       941.12       200.57       960.38 o
   5   17    1      3613.99       372.36      3333.91 o
   6   17    1      5110.74       428.05      4514.50 o
   7   17    1      2392.74       240.70      2515.02 o
   8   17    1       923.26       285.45       723.07 o
  -7   18    1      1524.09       446.01      1956.29 o
  -6   18    1      1004.43       301.00       912.64 o
  -5   18    1      2142.13       273.94      1956.29 o
  -4   18    1      4884.51       389.61      4144.78 o
  -3   18    1       807.91       192.68       850.89 o
  -2   18    1      4762.63       363.34      4113.94 o
  -1   18    1      1727.97       500.65      1875.76 o
   0   18    1       283.73        59.12       308.70 o
   1   18    1      1466.87       175.29      1785.91 o
   2   18    1      4616.53       320.32      4151.22 o
   3   18    1       909.71       155.68       825.99 o
   4   18    1      4326.63       484.38      4058.96 o
   5   18    1      2169.29       318.94      2132.59 o
   6   18    1       880.89       228.77       904.81 o
   7   18    1      2021.25       396.05      1717.27 o
  -6   19    1      1374.79       534.60      1817.32 o
  -5   19    1      2386.01       300.88      2246.76 o
  -4   19    1      2743.03       331.61      2453.22 o
  -3   19    1      1472.15       562.45      1743.90 o
  -2   19    1      1468.19       539.28      2025.00 o
  -1   19    1      1150.04       225.22      1094.29 o
   0   19    1      3212.10       276.94      3180.96 o
   1   19    1       914.91       136.35       926.59 o
   2   19    1      2350.84       206.89      2356.13 o
   3   19    1      1978.16       240.29      1859.33 o
   4   19    1      2230.62       282.79      2385.35 o
   5   19    1      2337.51       339.40      2119.68 o
   6   19    1      1290.63       560.02      1832.70 o
  -3   20    1      1326.73       230.63      1265.22 o
  -2   20    1       639.70       175.81       717.70 o
  -1   20    1      4602.51       768.06      3750.34 o
   0   20    1      4022.09       700.54      3501.09 o
   1   20    1      5091.07       650.66      3913.75 o
   2   20    1       818.70       297.35       765.08 o
   3   20    1      1045.19       206.92      1093.62 o
   2    0    2      3302.43       108.76      2905.21 o
   3    0    2     11302.58       182.92     12005.58 o
   4    0    2      2370.91        62.00      2782.56 o
   5    0    2     26168.68       512.13     26978.06 o
   6    0    2      1518.72        67.05      1521.00 o
   7    0    2     39136.86       796.49     39800.25 o
   8    0    2      5812.26       178.39      6084.00 o
   9    0    2     13648.37       385.93     13298.70 o
  10    0    2      1178.22        94.49       990.36 o
  11    0    2      7200.91       294.93      7061.04 o
  12    0    2      2918.77       193.35      2323.24 o
  13    0    2      6050.77       297.12      5146.63 o
  14    0    2       374.00       105.81       297.56 o
  15    0    2       197.60        80.30       247.75 o
 -17    1    2       360.16       118.86       530.84 o
 -15    1    2       883.95       126.86       823.69 o
 -14    1    2      2777.38       210.37      2280.06 o
 -13    1    2       976.28       137.62       783.44 o
 -12    1    2      1776.94       136.35      1612.83 o
 -11    1    2      1184.14       114.86      1166.91 o
 -10    1    2      4250.02       174.98      3943.84 o
  -9    1    2       206.40        53.39       232.87 o
  -8    1    2      2129.41       107.98      1962.49 o
  -7    1    2      4241.05       147.90      4112.66 o
  -6    1    2     17189.03       365.44     17816.91 o
  -5    1    2      3073.21       101.11      3142.72 o
  -4    1    2     23989.40       383.75     24432.82 o
  -3    1    2     58754.35      1259.50     58520.45 o
  -2    1    2      9510.45       258.40      9262.14 o
  -1    1    2     25902.16       459.67     24834.61 o
   1    1    2     26498.14       453.73     25500.90 o
   2    1    2      7335.86       185.68      7475.33 o
   3    1    2     56720.36      1393.22     57360.25 o
   4    1    2     22314.18       406.09     22918.93 o
   5    1    2      3667.98        89.62      3520.05 o
   6    1    2     16197.67       310.95     16798.75 o
   7    1    2      3896.51       115.99      3824.19 o
   8    1    2      2146.91        89.29      2166.90 o
   9    1    2       288.39        46.17       298.25 o
  10    1    2      3728.66       163.90      3458.62 o
  11    1    2      1524.09       116.88      1479.17 o
  12    1    2      1671.22       136.46      1500.01 o
  13    1    2       812.80       109.88       711.82 o
  14    1    2      3472.66       257.53      2862.25 o
  15    1    2       780.75       188.46       839.26 o
 -16    2    2       333.25       110.56       578.40 o
 -15    2    2       419.92       114.94       518.93 o
 -14    2    2      3065.59       203.86      2868.67 o
 -13    2    2       821.66       117.38       812.25 o
 -12    2    2     11055.18       466.74     10108.29 o
 -11    2    2      3690.94       188.15      3421.08 o
 -10    2    2     14229.31       443.32     13670.29 o
  -9    2    2       413.60        54.59       441.84 o
  -8    2    2     18195.90       492.03     18539.55 o
  -7    2    2      4630.57       156.89      4558.95 o
  -6    2    2     25477.48       560.25     26124.26 o
  -5    2    2       556.44        48.70       548.03 o
  -4    2    2     25697.66       650.92     26846.82 o
  -3    2    2     10172.62       242.95     10030.02 o
  -2    2    2     22768.82       389.43     22428.06 o
  -1    2    2       282.57        17.93       238.39 o
   0    2    2      1661.39        36.47      1819.88 o
   1    2    2       182.89        23.73       164.87 o
   2    2    2     23739.55       397.65     23064.50 o
   3    2    2      9154.76       177.79      9214.08 o
   4    2    2     25433.56       400.61     26425.75 o
   5    2    2       653.70        35.19       664.09 o
   6    2    2     25170.82       469.51     25901.68 o
   7    2    2      4774.51       133.15      4809.42 o
   8    2    2     17844.83       404.52     18257.41 o
   9    2    2       247.85        52.01       320.77 o
  10    2    2     14646.91       408.13     14237.26 o
  11    2    2      3266.94       192.75      3229.65 o
  12    2    2     10410.00       459.94      9814.86 o
  13    2    2       901.43        98.15       731.16 o
  14    2    2      2898.36       246.39      3105.83 o
  15    2    2       401.78        91.05       471.76 o
  16    2    2       345.29       116.38       671.33 o
 -17    3    2      2364.21       858.34      3422.25 o
 -16    3    2       256.59       108.59       364.81 o
 -15    3    2      3400.04       266.87      3020.60 o
 -14    3    2      2380.97       214.93      2388.28 o
 -13    3    2      5135.37       283.59      4723.81 o
 -12    3    2       404.55        98.28       428.49 o
 -11    3    2      1571.47       129.59      1361.61 o
 -10    3    2      3149.99       154.51      3105.83 o
  -9    3    2       247.85        54.72       203.63 o
  -8    3    2       261.02        50.04       294.81 o
  -7    3    2      1530.81        86.17      1645.11 o
  -6    3    2      5933.56       204.10      6882.36 o
  -5    3    2     17333.70       362.44     17174.10 o
  -4    3    2     10466.25       306.28     10479.62 o
  -3    3    2     16874.67       388.90     18262.82 o
  -2    3    2     18993.56       369.91     18769.00 o
  -1    3    2     41317.62       720.45     40965.76 o
   0    3    2      3138.41        53.98      3344.31 o
   1    3    2     45709.24       823.99     45296.61 o
   2    3    2     21147.56       350.29     21117.90 o
   3    3    2     21504.35       378.46     22440.04 o
   4    3    2     11556.42       218.26     11408.38 o
   5    3    2     17374.50       272.15     17400.25 o
   6    3    2      6775.22       133.13      7562.04 o
   7    3    2      1369.69        72.59      1461.53 o
   8    3    2       263.25        36.29       267.98 o
   9    3    2       286.64        48.94       246.80 o
  10    3    2      2846.72       137.70      3056.98 o
  11    3    2      1533.51       118.58      1472.26 o
  12    3    2       356.25        75.99       320.05 o
  13    3    2      4995.77       243.22      4978.71 o
  14    3    2      2198.24       196.83      2369.74 o
  15    3    2      3722.36       277.13      3534.30 o
  16    3    2       254.94        95.05       406.43 o
  17    3    2      3821.69       942.39      3772.42 o
 -16    4    2       256.59       117.96       297.56 o
 -15    4    2       590.22       219.03      1170.32 o
 -14    4    2      2557.06       203.59      2428.52 o
 -13    4    2      3982.91       201.97      3595.20 o
 -12    4    2      3505.18       177.25      3007.43 o
 -11    4    2      6261.35       277.74      5905.92 o
 -10    4    2      7696.82       341.14      7346.20 o
  -9    4    2     10785.49       385.96     10861.81 o
  -8    4    2     14818.16       423.08     15084.75 o
  -7    4    2     10728.38       295.83     11067.04 o
  -6    4    2      4838.92       189.10      4792.79 o
  -5    4    2      7259.43       214.03      7463.23 o
  -4    4    2     24229.84       562.43     24611.33 o
  -3    4    2       641.44        50.55       530.38 o
  -2    4    2     21955.80       392.61     21441.74 o
  -1    4    2      2049.19        62.31      2183.69 o
   0    4    2      1742.30        47.40      1621.67 o
   1    4    2      2467.37        51.28      2601.00 o
   2    4    2     21499.30       297.69     21045.30 o
   3    4    2       231.86        45.06       202.49 o
   4    4    2     24128.17       497.10     24752.73 o
   5    4    2      7315.24       103.01      7503.02 o
   6    4    2      5856.94       113.24      5915.15 o
   7    4    2     10473.29       207.78     10991.43 o
   8    4    2     15218.77       339.61     15480.34 o
   9    4    2     10329.40       276.29     10637.86 o
  10    4    2      7736.12       242.13      7542.92 o
  11    4    2      5843.78       213.08      5616.00 o
  12    4    2      2933.67       180.79      2788.90 o
  13    4    2      3065.59       196.24      3099.15 o
  14    4    2      2159.69       222.29      2275.29 o
  15    4    2      1034.09       135.00      1234.82 o
 -16    5    2      5986.69       646.99      5640.01 o
 -15    5    2       405.93       128.96       582.26 o
 -14    5    2      4649.32       382.46      4286.32 o
 -13    5    2       583.55        99.75       505.35 o
 -12    5    2      5981.37       252.83      5483.40 o
 -11    5    2       130.13        56.13       209.09 o
 -10    5    2      5032.32       241.67      4998.49 o
  -9    5    2      2696.37       173.33      2548.23 o
  -8    5    2      1579.67       105.31      1341.02 o
  -7    5    2      3476.72       125.80      3549.78 o
  -6    5    2      3434.24       104.86      3992.98 o
  -5    5    2      1312.98        71.07      1020.80 o
  -4    5    2      7811.97       215.94      8379.57 o
  -3    5    2      1756.69        79.33      1934.24 o
  -2    5    2     49003.65      1279.75     50068.54 o
  -1    5    2       396.29        26.03       340.40 o
   0    5    2     83234.59      2055.05     83544.12 o
   1    5    2       362.77        26.22       382.59 o
   2    5    2     52933.92      1195.49     54130.68 o
   3    5    2      1800.23        61.32      1940.40 o
   4    5    2      7233.07        93.65      7858.82 o
   5    5    2       878.84        59.17       761.76 o
   6    5    2      3173.21        71.72      3595.20 o
   7    5    2      3216.00        93.67      3393.06 o
   8    5    2      1552.43        75.93      1517.10 o
   9    5    2      2463.96        97.36      2522.05 o
  10    5    2      4583.85       163.09      4849.73 o
  11    5    2       237.13        45.04       181.44 o
  12    5    2      5896.51       332.94      5634.00 o
  13    5    2       378.01        78.95       510.76 o
  14    5    2      5642.98       429.10      4794.18 o
  16    5    2      6150.21       518.14      5526.44 o
 -16    6    2       347.21       136.58       487.97 o
 -15    6    2       834.53       246.53      1370.48 o
 -14    6    2       847.50       174.31       663.06 o
 -13    6    2      2015.07       247.15      1907.07 o
 -12    6    2      2224.13       149.30      2197.73 o
 -11    6    2      6800.74       278.10      6541.57 o
 -10    6    2      3348.07       181.19      3377.93 o
  -9    6    2     18794.90       599.13     18550.44 o
  -8    6    2      7116.48       220.62      7286.33 o
  -7    6    2     21167.58       645.84     20692.82 o
  -6    6    2      8818.78       306.99      8465.84 o
  -5    6    2     25763.89       668.33     26166.30 o
  -4    6    2      1200.77        65.58       956.66 o
  -3    6    2     18658.34       502.95     17931.89 o
  -2    6    2      3458.48       111.30      3491.63 o
  -1    6    2       268.86        44.01       292.07 o
   0    6    2     12793.83       253.00     12975.49 o
   1    6    2       267.73        24.77       262.76 o
   2    6    2      2833.88        93.42      2956.10 o
   3    6    2     18677.14       385.63     18414.49 o
   4    6    2       645.81        48.10       599.27 o
   5    6    2     24698.09       448.86     26046.73 o
   6    6    2      7666.66       156.68      8026.37 o
   7    6    2     21077.56       409.66     21036.60 o
   8    6    2      6185.34       162.38      6922.24 o
   9    6    2     17428.97       413.41     17862.32 o
  10    6    2      3595.40       189.83      3818.00 o
  11    6    2      5491.50       321.30      6135.59 o
  12    6    2      2481.07       178.26      2225.95 o
  13    6    2      1937.06       321.08      2094.89 o
  14    6    2       332.00        86.53       659.46 o
 -16    7    2       955.96       254.28       843.90 o
 -15    7    2      2102.50       511.23      3197.90 o
 -14    7    2      2010.44       283.90      2115.08 o
 -13    7    2      2687.44       249.75      2652.25 o
 -12    7    2       968.77       118.89       900.60 o
 -11    7    2      1335.52       230.13      1479.17 o
 -10    7    2      1113.00       168.76       952.96 o
  -9    7    2      2978.57       234.75      2718.58 o
  -8    7    2       116.38        48.63        55.35 o
  -7    7    2      1291.87       102.66      1272.35 o
  -6    7    2      2292.81       141.70      2163.18 o
  -5    7    2     10027.38       289.45     10459.15 o
  -4    7    2      8635.54       233.44      8372.25 o
  -3    7    2     17076.42       467.66     17540.35 o
  -2    7    2     18270.24       306.98     19196.10 o
  -1    7    2     31951.32       602.80     32058.90 o
   0    7    2       177.81        22.48        83.72 o
   1    7    2     33665.23       650.32     33852.32 o
   2    7    2     17978.38       415.26     18703.30 o
   3    7    2     18691.25       432.82     19074.37 o
   4    7    2      9085.75       239.44      8727.30 o
   5    7    2      9243.88       221.67      9553.11 o
   6    7    2      2289.51        64.22      2476.06 o
   7    7    2       991.39        39.01      1069.29 o
   8    7    2        32.04        14.61        47.61 o
   9    7    2      2933.67       173.34      2803.70 o
  10    7    2       960.22        97.03       990.99 o
  11    7    2      1280.76       129.31      1203.40 o
  12    7    2       618.13       122.34       693.27 o
  13    7    2      2522.37       395.77      2783.62 o
 -14    8    2      1203.16       364.05      1946.57 o
 -12    8    2      8106.68       737.39      6948.89 o
 -11    8    2       364.74       156.41       320.77 o
 -10    8    2     12557.51       937.04     12886.79 o
  -9    8    2       681.26       114.07       852.64 o
  -8    8    2     20957.83       712.38     19872.54 o
  -7    8    2      1412.04       118.96      1246.09 o
  -6    8    2     17189.03       577.48     16868.81 o
  -5    8    2      3212.10       159.92      2986.62 o
  -4    8    2     10148.34       315.46     10237.39 o
  -3    8    2       981.66        81.94       905.41 o
  -2    8    2      1222.33        34.89      1383.84 o
  -1    8    2      3402.05        76.27      3431.62 o
   0    8    2     12061.21       347.68     12274.42 o
   1    8    2      3937.43       136.03      3809.36 o
   2    8    2      1438.02        65.25      1574.50 o
   3    8    2      1024.16        73.78       865.54 o
   4    8    2      9537.31       248.68      9854.53 o
   5    8    2      2939.26       125.00      2944.15 o
   6    8    2     17766.77       380.70     17782.22 o
   7    8    2      1296.82        47.09      1326.42 o
   8    8    2     18140.24       458.84     19151.79 o
   9    8    2       743.70       152.96       801.46 o
  10    8    2     11273.33       573.62     11809.17 o
  11    8    2       322.04       100.04       324.36 o
  12    8    2      6456.17       428.57      6427.23 o
 -14    9    2      1212.73       238.47      1743.90 o
 -13    9    2       777.87       356.06      1245.38 o
 -12    9    2       320.81       118.34       368.64 o
 -11    9    2       446.41       122.87       389.67 o
 -10    9    2       341.47       105.56       509.40 o
  -9    9    2       390.82       103.40       225.90 o
  -8    9    2       307.99        76.70       201.92 o
  -7    9    2      4964.20       252.15      5090.82 o
  -6    9    2      5372.30       259.79      5539.82 o
  -5    9    2      5817.51       278.21      5826.27 o
  -4    9    2      7125.19       258.52      7106.49 o
  -3    9    2     15940.31       590.86     15878.52 o
  -2    9    2     15749.72       272.07     15722.65 o
  -1    9    2     29302.20       642.06     28862.61 o
   0    9    2      9007.20       235.14      8517.44 o
   1    9    2     26520.55       694.89     26357.52 o
   2    9    2     14780.48       380.70     14701.56 o
   3    9    2     16443.85       419.20     16240.95 o
   4    9    2      7235.99       213.68      7136.87 o
   5    9    2      6417.52       173.67      6422.42 o
   6    9    2      5362.22       186.47      5453.82 o
   7    9    2      5069.00       169.05      5240.31 o
   8    9    2        72.24        28.37       218.15 o
   9    9    2       318.35        50.35       339.66 o
  10    9    2       240.85        47.00       309.41 o
  11    9    2       513.47        74.86       574.56 o
 -13   10    2      1800.23       414.65      2567.45 o
 -12   10    2       329.49       143.67       474.80 o
 -11   10    2      7291.72      1028.45      8556.25 o
 -10   10    2      2018.16       222.61      2281.97 o
  -9   10    2     13404.25       717.12     12378.79 o
  -8   10    2      1686.73       146.98      1481.48 o
  -7   10    2      4576.87       239.79      4670.36 o
  -6   10    2      1453.72       124.64      1458.48 o
  -5   10    2      7748.23       308.96      7397.72 o
  -4   10    2      5155.11       316.25      5073.71 o
  -3   10    2      6713.05       267.85      6643.88 o
  -2   10    2       136.08        24.09       131.79 o
  -1   10    2      4376.57       134.31      4222.40 o
   0   10    2      6077.56       171.69      6129.32 o
   1   10    2      4344.76       138.36      4341.49 o
   2   10    2       142.99        56.37       128.82 o
   3   10    2      6101.73       212.35      6116.80 o
   4   10    2      5573.41       187.54      5529.41 o
   5   10    2      6889.00       217.07      6630.84 o
   6   10    2      1597.50       101.78      1509.32 o
   7   10    2      5820.13       194.27      5855.31 o
   8   10    2       892.16       151.09      1029.77 o
   9   10    2     11567.52       729.10     12126.41 o
  10   10    2      2097.77       201.74      2202.42 o
  11   10    2      8321.87       835.01      8469.52 o
  13   10    2      1950.71       595.78      2514.02 o
 -14   11    2      5812.26       689.97      4158.96 o
 -10   11    2       809.86       138.08       904.20 o
  -9   11    2       199.54        83.61       226.80 o
  -7   11    2       794.27        95.04       743.11 o
  -6   11    2      1118.75        87.47       942.49 o
  -5   11    2      2602.50       203.64      2220.29 o
  -4   11    2     11582.33       451.81     11530.46 o
  -3   11    2      1665.60       141.84      1437.93 o
  -2   11    2     20065.85       355.84     20195.25 o
  -1   11    2      1727.97       104.42      1562.62 o
   0   11    2     18456.77       486.20     18594.05 o
   1   11    2      1568.74        95.41      1383.84 o
   2   11    2     18927.22       459.21     18779.96 o
   3   11    2      1382.45       104.92      1225.70 o
   4   11    2     11127.66       344.85     11113.38 o
   5   11    2      2307.66       145.47      2297.28 o
   6   11    2       922.21        96.14       919.91 o
   7   11    2       474.47        59.96       497.74 o
   9   11    2       223.04        77.60       266.34 o
  10   11    2       727.84       129.04       728.46 o
 -11   12    2      2080.47       899.36      2057.53 o
 -10   12    2      3601.59      1257.67      4147.36 o
  -9   12    2      2110.40       208.67      2242.02 o
  -8   12    2      7271.16       730.64      8015.62 o
  -7   12    2      7519.73       465.51      7082.91 o
  -6   12    2      8581.27       459.03      8049.68 o
  -5   12    2      5960.10       313.48      5545.78 o
  -4   12    2      4180.76       233.62      4028.44 o
  -3   12    2      2557.06       161.83      2354.19 o
  -2   12    2      2134.17        66.77      2164.11 o
  -1   12    2      3900.81       131.10      3995.50 o
   0   12    2      2620.08       121.54      2619.39 o
   1   12    2      3892.22       163.16      3940.07 o
   2   12    2      2522.37       129.62      2299.20 o
   3   12    2      2609.53       133.60      2373.64 o
   4   12    2      4689.29       238.00      4565.70 o
   5   12    2      5291.90       212.78      4977.30 o
   6   12    2      9356.71       309.56      9319.97 o
   7   12    2      6346.05       468.76      6923.90 o
   8   12    2      7606.52       429.17      8372.25 o
   9   12    2      2648.34       329.38      2247.71 o
  10   12    2      3580.97       590.99      4214.61 o
  11   12    2      1150.04       389.77      2341.59 o
 -13   13    2      2411.29       420.75      1917.56 o
 -10   13    2      2933.67       411.91      2512.01 o
  -9   13    2       401.78        88.29       353.06 o
  -8   13    2       778.83       117.16       719.31 o
  -7   13    2       692.99       122.29       716.63 o
  -6   13    2       375.33       101.33       367.87 o
  -5   13    2     10828.41       504.90      9916.18 o
  -4   13    2      1439.32       147.52      1421.29 o
  -3   13    2     13205.78       601.07     12247.85 o
  -2   13    2      2743.03       133.37      2769.92 o
  -1   13    2     18700.66       475.28     18109.08 o
   0   13    2      1356.98       124.23      1302.49 o
   1   13    2     18536.33       501.30     17503.29 o
   2   13    2      2952.33       147.71      2780.45 o
   3   13    2     12399.90       406.18     11515.44 o
   4   13    2      1304.27        84.51      1325.69 o
   5   13    2     10860.67       337.10     10639.92 o
   6   13    2       237.13        36.56       419.84 o
   7   13    2       416.40        54.07       456.25 o
   8   13    2       395.60        59.55       702.78 o
   9   13    2       119.37        25.57       307.65 o
 -12   14    2      5306.93       824.74      4442.22 o
 -11   14    2       899.37       320.94      1007.43 o
 -10   14    2      4011.19       568.82      3703.94 o
  -9   14    2      2269.80       362.32      2457.18 o
  -8   14    2      8091.19       436.44      7284.62 o
  -7   14    2      1607.14       240.04      1472.26 o
  -6   14    2      7362.41       534.43      7458.05 o
  -5   14    2      3044.66       260.13      2660.50 o
  -4   14    2      6634.34       456.86      6105.86 o
  -3   14    2      1678.26       187.49      1665.46 o
  -2   14    2       376.00        42.04       284.93 o
  -1   14    2       978.43        82.88       856.15 o
   0   14    2      1162.92        92.70      1273.78 o
   1   14    2       586.88       100.04       631.52 o
   3   14    2      1787.11        98.92      1628.93 o
   4   14    2      6614.74       268.68      6771.64 o
   5   14    2      2879.86       138.50      3045.94 o
   6   14    2      8196.77       604.40      8451.12 o
   7   14    2      1894.88       199.22      1600.00 o
   8   14    2      7457.20       347.68      7416.65 o
  12   14    2      3926.64      1746.61      4487.66 o
 -10   15    2       716.74       166.75      1009.97 o
  -9   15    2       588.54       217.05       727.92 o
  -7   15    2       802.05       153.98       535.92 o
  -6   15    2      2924.35       329.37      2746.81 o
  -4   15    2      6434.07       345.03      5833.90 o
  -3   15    2      1978.16       214.27      1713.96 o
  -2   15    2     12258.53       453.38     12904.96 o
  -1   15    2      1175.86        79.06       913.85 o
   0   15    2      3499.07       146.56      3263.84 o
   1   15    2       522.87       130.62       531.30 o
   2   15    2     13099.23       437.17     12541.76 o
   3   15    2      1593.37       103.02      1455.42 o
   4   15    2      5496.60       186.24      5578.60 o
   5   15    2       267.73        38.29       235.32 o
   6   15    2      3356.04       301.02      3018.40 o
   7   15    2       659.87       113.15       512.12 o
   9   15    2      1084.49       312.77       668.22 o
  10   15    2       849.51       383.13       931.47 o
  -9   16    2      8460.56       762.81      7766.90 o
  -7   16    2      4891.73       418.78      3926.28 o
  -6   16    2       318.96       129.06       291.73 o
  -5   16    2      4378.85       375.72      3937.56 o
  -4   16    2      1609.90       238.86      1447.80 o
  -3   16    2      4401.65       278.53      3768.73 o
  -2   16    2       480.49        70.90       764.52 o
  -1   16    2       400.41        65.41       431.39 o
   1   16    2       499.53        61.53       401.60 o
   2   16    2       736.22        78.43       816.24 o
   3   16    2      3647.17       195.35      3644.54 o
   4   16    2      1100.41       110.73      1382.35 o
   5   16    2      4319.84       355.09      3514.12 o
   6   16    2       368.04       101.66       319.69 o
   7   16    2      5241.95       401.12      4182.21 o
   9   16    2      9537.31      1169.48      7931.68 o
  -7   17    2       728.76       289.83       720.39 o
  -6   17    2      2108.81       274.96      2062.07 o
  -5   17    2      1458.97       216.87      1453.13 o
  -4   17    2      3674.23       292.02      3362.84 o
  -3   17    2      4232.09       344.75      3571.26 o
  -2   17    2      6346.05       498.91      5278.02 o
  -1   17    2      5010.37       250.88      5019.72 o
   0   17    2      8896.50       324.57      8522.98 o
   1   17    2      5042.09       239.46      4858.09 o
   2   17    2      5767.74       258.73      5492.29 o
   3   17    2      3098.06       185.79      3084.69 o
   4   17    2      3202.35       348.57      2997.56 o
   5   17    2      1887.40       236.21      1637.82 o
   6   17    2      1785.66       360.62      2116.00 o
   7   17    2      1335.52       316.90       787.36 o
   9   17    2       455.92       209.41       519.84 o
  -7   18    2       360.16       136.49       342.99 o
  -6   18    2      6556.09       523.82      5527.92 o
  -5   18    2       934.79       214.63       863.18 o
  -4   18    2      3378.01       386.00      3204.69 o
  -3   18    2       308.60       109.41       285.95 o
  -2   18    2      1184.14       335.11      1257.41 o
  -1   18    2       733.42       171.47       709.69 o
   0   18    2      1413.33       148.77      1597.60 o
   1   18    2       622.41        91.00       707.56 o
   2   18    2       891.13       103.75      1122.92 o
   4   18    2      3204.30       368.15      3121.46 o
   5   18    2       713.06       250.86       784.00 o
   6   18    2      5728.61       461.00      5476.00 o
   8   18    2      3338.13       574.58      3338.53 o
  -5   19    2      2058.55       744.73      2626.56 o
  -4   19    2       883.95       171.88       744.74 o
  -3   19    2      3743.39       431.61      3478.64 o
  -2   19    2       644.06       212.21       851.47 o
  -1   19    2      8728.53       630.13      7819.86 o
   0   19    2      1059.70       300.21      1151.92 o
   1   19    2      9237.26       863.20      7858.82 o
   2   19    2       754.06       136.07       795.24 o
   3   19    2      3370.01       367.57      3501.09 o
   4   19    2       677.67       208.72       711.82 o
   5   19    2      2402.85       296.88      2341.59 o
  -3   20    2       762.59       243.27       885.66 o
  -1   20    2       710.30       181.59       884.47 o
   3   20    2       856.54       155.09      1067.33 o
   1    0    3       153.04        26.82        59.75 o
   2    0    3     10497.96       377.26     10207.06 o
   3    0    3     23385.65       620.95     24787.35 o
   4    0    3     13975.95       341.72     14127.70 o
   5    0    3     15749.72       315.25     16734.01 o
   6    0    3     29935.87       666.83     30852.92 o
   7    0    3      2997.38       133.76      2764.66 o
   8    0    3      7851.56       210.39      7607.33 o
   9    0    3      2703.52       132.40      2725.88 o
  10    0    3      2956.08       138.45      2641.96 o
  11    0    3       672.31        82.98       598.78 o
  12    0    3      8350.14       402.49      7795.12 o
  14    0    3       217.93        85.85       222.90 o
  15    0    3      3006.81       752.88      3545.01 o
  17    0    3      1233.18       512.37      2768.86 o
 -17    1    3      1528.12       540.76      2710.24 o
 -15    1    3      4285.98       328.91      4034.79 o
 -14    1    3      1339.30       164.97      1179.24 o
 -13    1    3      5504.26       329.34      4821.91 o
 -12    1    3      5825.38       562.05      5797.30 o
 -11    1    3      2082.04       150.74      1901.83 o
 -10    1    3      6503.26       235.88      6425.63 o
  -9    1    3       281.42        48.49       230.13 o
  -8    1    3      4637.60       201.53      4525.25 o
  -7    1    3     10508.54       289.26     10714.32 o
  -6    1    3     14061.51       371.33     14111.06 o
  -5    1    3     22211.49       497.46     23070.57 o
  -4    1    3     24525.34       538.90     25157.13 o
  -3    1    3      6926.18       243.43      6619.45 o
  -2    1    3     59751.12      1480.42     57955.75 o
  -1    1    3     23893.56       537.23     23104.00 o
   0    1    3      8378.47       173.24      8377.74 o
   1    1    3     22515.10       444.05     22455.02 o
   2    1    3     57089.76      1660.85     54868.38 o
   3    1    3      5042.09       173.49      5112.25 o
   4    1    3     23580.76       544.27     24286.11 o
   5    1    3     22768.82       519.24     24080.83 o
   6    1    3     14106.43       310.62     14332.88 o
   7    1    3     10806.94       261.14     10997.72 o
   8    1    3      5402.61       151.76      5386.09 o
   9    1    3       140.53        44.87       180.10 o
  10    1    3      6134.03       210.22      6217.32 o
  11    1    3      1667.00       127.85      1678.54 o
  12    1    3      6321.40       276.33      5936.70 o
  13    1    3      5859.58       360.87      5269.31 o
  14    1    3      1331.75       146.93      1090.32 o
  15    1    3      3404.06       783.00      4055.14 o
  16    1    3       241.92       110.26       259.85 o
 -16    2    3      1044.08       456.99      1548.42 o
 -15    2    3       593.56       174.38       717.17 o
 -14    2    3      1314.23       167.16      1243.97 o
 -13    2    3      5039.64       322.46      4671.72 o
 -12    2    3      2061.67       221.87      1948.34 o
 -11    2    3      4724.71       269.65      4673.09 o
 -10    2    3      1517.38       121.98      1210.34 o
  -9    2    3      8680.37       336.63      8915.14 o
  -8    2    3       182.89        68.87       331.24 o
  -7    2    3     24844.32       748.50     24989.29 o
  -6    2    3       200.03        54.02       228.01 o
  -5    2    3     32185.49       672.91     32403.60 o
  -4    2    3      7475.04       145.78      8199.30 o
  -3    2    3     18752.46       603.17     18504.16 o
  -2    2    3     34070.53       743.15     34188.01 o
  -1    2    3     20798.72       466.49     20655.44 o
   0    2    3      4748.39       111.45      4563.00 o
   1    2    3     21833.60       513.55     21617.82 o
   2    2    3     34478.25       958.44     34503.06 o
   3    2    3     16426.21       374.88     16368.64 o
   4    2    3      6931.90       467.00      8184.82 o
   5    2    3     32086.79       739.68     32681.41 o
   7    2    3     24725.13       568.15     24856.68 o
   8    2    3       249.47        43.48       252.17 o
   9    2    3     10020.49       268.68      9902.24 o
  10    2    3      1372.24        87.96      1218.01 o
  11    2    3      4670.46       364.51      4311.24 o
  12    2    3      1774.04       182.62      1958.06 o
  13    2    3      5160.05       252.13      4772.05 o
  14    2    3      1412.04       152.58      1395.02 o
  15    2    3       761.64       133.90       783.44 o
  16    2    3      1311.73       314.07      1538.21 o
 -17    3    3       507.25       144.15       532.22 o
 -16    3    3      1317.97       432.24      1923.70 o
 -15    3    3       349.14       154.32       348.94 o
 -14    3    3      1399.14       216.24      1447.04 o
 -12    3    3      1723.68       154.30      1600.00 o
 -11    3    3      7084.58       315.71      6416.01 o
 -10    3    3      1643.21       175.76      1658.12 o
  -9    3    3     20183.01       723.53     20056.22 o
  -8    3    3      2377.61       166.11      2457.18 o
  -7    3    3      2522.37       139.99      2647.10 o
  -6    3    3      9564.22       339.90      9751.56 o
  -5    3    3       462.55        58.47       379.08 o
  -4    3    3     21889.57       631.31     22189.08 o
  -3    3    3     25477.48      2598.01     29193.14 o
  -2    3    3     14389.84       251.80     14132.45 o
  -1    3    3      7636.56       150.36      7929.90 o
   0    3    3      2548.36        86.86      2756.25 o
   1    3    3      9148.18       177.73      9397.36 o
   2    3    3     13320.71       293.90     12998.28 o
   3    3    3     27767.74       584.89     28187.05 o
   4    3    3     23013.52       417.62     23164.84 o
   5    3    3       424.16        48.90       452.84 o
   6    3    3      9493.68       264.88      9747.61 o
   7    3    3      2676.75        85.46      2567.45 o
   8    3    3      2691.01       114.25      2529.08 o
   9    3    3     19112.31       451.94     19510.50 o
  10    3    3      1388.86        91.05      1441.72 o
  11    3    3      5736.43       237.17      5659.55 o
  12    3    3      1715.12       148.21      1601.60 o
  14    3    3      1650.19       177.53      1714.79 o
  15    3    3       323.28        94.04       327.61 o
  16    3    3      1801.69       595.94      1994.52 o
 -16    4    3       477.47       151.89       652.80 o
 -15    4    3       987.06       156.76       954.19 o
 -14    4    3      2229.00       258.32      2367.80 o
 -13    4    3      1700.89       167.46      1476.10 o
 -12    4    3      3219.90       247.99      2879.40 o
 -11    4    3      5712.99       356.33      5433.16 o
 -10    4    3      3589.21       237.08      3293.61 o
  -9    4    3     11552.72       443.84     11140.80 o
  -8    4    3      4274.73       233.99      4404.98 o
  -7    4    3     12110.39       397.62     12441.17 o
  -6    4    3     31333.09       974.59     30863.46 o
  -5    4    3     13111.05       405.84     13409.64 o
  -4    4    3     11375.87       374.36     11599.29 o
  -3    4    3      2282.93       134.82      2424.58 o
  -2    4    3     13765.21       238.20     13546.63 o
  -1    4    3     15427.49       324.83     15517.68 o
   0    4    3     26880.42       535.97     27712.26 o
   1    4    3     16696.34       315.70     17030.25 o
   2    4    3     14216.99       287.21     13992.52 o
   3    4    3      2253.43        98.01      2437.40 o
   4    4    3     11519.46       217.91     11713.73 o
   5    4    3     14147.33       343.81     14505.79 o
   6    4    3     32943.06       799.45     32245.38 o
   7    4    3     11850.51       337.14     12343.21 o
   8    4    3      4250.02       123.38      4607.69 o
   9    4    3     10778.34       292.95     11054.42 o
  10    4    3      3707.68       152.96      3285.58 o
  11    4    3      5692.20       241.45      5656.54 o
  12    4    3      3008.69       139.68      2941.98 o
  13    4    3      1341.81       190.34      1517.10 o
  14    4    3      2053.87       252.64      2582.67 o
  15    4    3       618.13       188.22       791.30 o
  16    4    3       640.57       205.54       666.67 o
 -15    5    3      2808.30       337.36      3143.84 o
 -14    5    3       548.35       132.96       425.60 o
 -13    5    3      3448.37       276.84      3110.29 o
 -12    5    3      2959.82       228.40      3016.21 o
 -11    5    3      2577.98       206.17      2260.05 o
 -10    5    3      5555.44       323.17      5430.22 o
  -9    5    3      2993.61       242.88      2864.39 o
  -8    5    3      9831.92       395.80      9723.93 o
  -7    5    3      6531.04       353.18      6701.06 o
  -6    5    3      5930.91       283.56      6105.86 o
  -5    5    3     11116.78       435.38     11031.30 o
  -4    5    3      3667.98       187.57      3892.51 o
  -3    5    3     11163.99       294.51     11961.80 o
  -2    5    3       887.02        54.32       926.59 o
  -1    5    3     21610.45       389.51     22058.19 o
   0    5    3      4798.32        97.73      4569.76 o
   1    5    3     22722.11       389.03     23189.20 o
   2    5    3       493.39        25.99       529.00 o
   3    5    3     11925.55       161.59     12864.10 o
   4    5    3      4493.44        83.04      4714.20 o
   5    5    3     11244.12       218.93     11556.25 o
   6    5    3      6492.17       196.86      6791.41 o
   7    5    3      6713.05       225.55      6898.96 o
   8    5    3     10473.29       316.95     10414.20 o
   9    5    3      2922.49       184.17      2809.00 o
  10    5    3      5046.97       264.02      5436.11 o
  11    5    3      1958.32       172.08      1878.36 o
  12    5    3      3380.01       242.07      3269.55 o
  13    5    3      3821.69       261.66      3676.00 o
  14    5    3       554.00       166.85       622.00 o
  15    5    3      2748.44       810.01      3301.65 o
 -15    6    3      3388.01       344.51      3184.34 o
 -14    6    3      1769.70       250.44      1706.52 o
 -13    6    3      1774.04       231.90      1521.00 o
 -12    6    3      4743.65       445.57      4167.99 o
 -11    6    3      2099.34       212.85      2010.63 o
 -10    6    3      8903.00       418.85      9162.32 o
  -9    6    3      2198.24       254.91      2028.60 o
  -8    6    3     10224.75       445.39     10078.15 o
  -7    6    3      2339.18       143.13      2371.69 o
  -6    6    3      2282.93       162.77      2367.80 o
  -5    6    3     10210.84       375.54     10978.85 o
  -4    6    3     18705.37       508.29     18268.23 o
  -3    6    3     15346.39       383.66     15823.12 o
  -2    6    3      5746.86       109.56      5715.36 o
  -1    6    3      3643.01        85.16      3749.11 o
   0    6    3      6492.17       135.86      6908.93 o
   1    6    3      3328.19        83.38      3594.00 o
   2    6    3      5976.05       103.75      6110.55 o
   3    6    3     14323.87       308.88     14967.08 o
   4    6    3     18010.70       503.38     17790.22 o
   5    6    3     11120.40       188.70     12034.09 o
   6    6    3      2929.94        89.41      3050.35 o
   7    6    3      1817.79       102.70      2017.81 o
   8    6    3     10297.95       338.73     10219.19 o
   9    6    3      2424.83       135.56      2319.39 o
  10    6    3      7799.81       322.14      8132.43 o
  11    6    3      2329.20       207.59      2200.55 o
  12    6    3      4410.79       262.82      4308.61 o
  13    6    3      1619.58       160.64      1637.82 o
  14    6    3       993.56       424.11      1690.85 o
  15    6    3      3073.21       400.60      3322.37 o
 -16    7    3      1190.06       384.62      1813.06 o
 -15    7    3      1041.85       292.12      1379.38 o
 -14    7    3      3251.22       453.25      3123.69 o
 -13    7    3      4250.02       320.80      4072.99 o
 -12    7    3      2063.24       259.47      1777.47 o
 -11    7    3      1626.51       213.72      1838.69 o
 -10    7    3       981.66       174.66       861.42 o
  -9    7    3      1453.72       164.00      1624.90 o
  -8    7    3      3501.11       234.15      3242.16 o
  -7    7    3      9848.99       505.43     10106.28 o
  -6    7    3      8689.99       327.20      8837.88 o
  -5    7    3     11843.02       374.48     11700.75 o
  -4    7    3     10086.04       324.85     10408.08 o
  -3    7    3     11545.33       314.28     11809.17 o
  -2    7    3     14860.08       243.30     14352.04 o
  -1    7    3     10357.40       224.13     10162.66 o
   0    7    3     21328.09       412.09     22070.07 o
   1    7    3      9161.35       187.74      9221.76 o
   2    7    3     15723.82       254.58     15121.62 o
   3    7    3     11361.19       297.10     11350.77 o
   4    7    3     10710.57       281.34     10712.25 o
   5    7    3     11229.53       229.73     11359.30 o
   6    7    3      8482.73       152.13      9523.81 o
   7    7    3      9641.78       233.15     10469.38 o
   8    7    3      3167.40       123.95      3381.42 o
   9    7    3      1494.68       143.68      1655.68 o
  10    7    3       702.07        96.65       746.38 o
  11    7    3      1959.84       147.77      2050.28 o
  12    7    3      1540.25       147.21      1512.43 o
  13    7    3      4295.00       336.02      4025.90 o
  14    7    3      2372.58       774.38      2934.39 o
  15    7    3       730.62       324.62      1415.26 o
 -15    8    3       559.69       138.40      1114.22 o
 -14    8    3      1682.50       580.12      2165.97 o
 -13    8    3      2669.64       304.03      2248.66 o
 -12    8    3       576.92       133.07       520.30 o
 -11    8    3      5679.23       404.55      5249.00 o
 -10    8    3      1622.35       191.27      1622.48 o
  -9    8    3     10975.73       659.73     11012.40 o
  -7    8    3     12038.55       479.50     11757.06 o
  -6    8    3      1917.42       155.20      1874.89 o
  -5    8    3      6442.35       240.29      6432.04 o
  -4    8    3      6112.49       242.13      6014.00 o
  -3    8    3      4701.08       209.99      4716.94 o
  -2    8    3     19978.20       350.20     19723.39 o
  -1    8    3      2560.54        95.77      2721.71 o
   0    8    3     12087.68       245.92     11800.48 o
   1    8    3      2887.26        92.45      2977.88 o
   2    8    3     19818.02       518.34     19886.64 o
   3    8    3      5342.08       178.57      5198.41 o
   4    8    3      6090.98       182.62      6105.86 o
   5    8    3      5374.83       171.55      5444.96 o
   6    8    3      1941.60       163.76      1830.98 o
   7    8    3     12000.82       531.53     11955.24 o
   8    8    3       111.24        28.67       117.94 o
   9    8    3      9872.91       376.11     10830.56 o
  10    8    3      1285.69       108.58      1455.42 o
  11    8    3      4649.32       347.26      4678.56 o
  12    8    3       437.01       129.49       517.56 o
  13    8    3      1502.67       362.83      2067.52 o
  14    8    3      1065.31       426.80      2229.73 o
 -15    9    3       623.27       217.35       743.11 o
 -14    9    3      1405.58       402.52      1834.41 o
 -13    9    3      1383.73       445.46      1632.97 o
 -12    9    3      1607.14       202.79      1688.39 o
 -11    9    3      2419.75       348.70      2353.22 o
 -10    9    3       568.68       113.24       774.51 o
  -9    9    3      7318.19       415.07      7276.09 o
  -8    9    3      1199.58       249.09      1058.85 o
  -7    9    3      2036.75       149.09      2051.18 o
  -6    9    3     10037.72       403.37     10010.00 o
  -5    9    3      1929.49       191.97      1920.19 o
  -4    9    3      6056.12       241.01      6040.40 o
  -3    9    3      5179.85       203.08      5158.11 o
  -2    9    3     10710.57       224.36     11250.84 o
  -1    9    3      7633.55       183.40      7979.85 o
   0    9    3     13324.68       329.69     13644.58 o
   1    9    3      7645.58       168.50      8145.06 o
   2    9    3     10131.02       332.51     10424.41 o
   3    9    3      4491.14       161.43      4525.25 o
   4    9    3      6072.20       187.70      5929.00 o
   5    9    3      2345.84       105.00      2222.18 o
   6    9    3     10221.27       257.45     10288.04 o
   7    9    3      1847.25       140.50      1890.51 o
   8    9    3       814.77       113.94       869.66 o
   9    9    3      6136.72       442.09      6082.44 o
  10    9    3       482.00        57.42       646.18 o
  11    9    3      2104.08       138.90      2385.35 o
  12    9    3      1056.34       288.55      1674.45 o
 -14   10    3       599.45       147.44       829.44 o
 -12   10    3      2291.16       902.63      2981.16 o
 -11   10    3      1822.19       327.57      1934.24 o
 -10   10    3      4781.64       402.14      4610.41 o
  -8   10    3      5928.26       429.22      5689.68 o
  -7   10    3      3318.27       223.99      3151.70 o
  -6   10    3      6665.21       289.36      6546.43 o
  -5   10    3       441.34        78.80       443.10 o
  -4   10    3      4644.63       180.58      4586.00 o
  -3   10    3      1273.38       138.76      1040.06 o
  -2   10    3      6436.83       129.76      6845.91 o
  -1   10    3     20163.46       430.00     20178.20 o
   0   10    3      3241.42       103.84      3534.30 o
   1   10    3     20183.01       513.31     20334.76 o
   2   10    3      6467.24       224.15      6598.31 o
   3   10    3       919.08        91.80       877.94 o
   4   10    3      3813.19       153.00      3728.32 o
   5   10    3       317.73        63.18       342.25 o
   6   10    3      6595.16       176.06      6344.12 o
   7   10    3      2822.90       173.69      2798.41 o
   8   10    3      5759.91       292.50      5521.98 o
  10   10    3      4738.91       345.85      4291.56 o
  11   10    3      1286.93       393.79      1703.21 o
  12   10    3      2129.41       620.88      2759.40 o
 -13   11    3      3412.09       478.40      2734.24 o
 -12   11    3       965.55       268.39      1658.12 o
 -11   11    3      2416.36       404.28      2521.04 o
 -10   11    3      4463.51       528.77      4498.38 o
  -9   11    3      1157.06       181.43      1325.69 o
  -8   11    3      5534.94       373.77      5330.46 o
  -6   11    3      3796.21       260.78      3769.96 o
  -5   11    3      4272.48       209.18      4214.61 o
  -4   11    3      1947.67       188.31      1576.09 o
  -3   11    3      8081.91       383.60      8179.39 o
  -2   11    3      2588.47        68.28      2722.75 o
  -1   11    3     11251.42       321.21     11470.41 o
   0   11    3      1426.30        93.57      1252.45 o
   1   11    3     12751.06       314.74     12721.58 o
   2   11    3      2069.49       122.10      2170.63 o
   3   11    3      8683.58       327.08      8552.55 o
   4   11    3      1835.44       106.15      1704.86 o
   5   11    3      4369.74       204.73      4004.36 o
   6   11    3      3672.15       156.39      3665.09 o
   7   11    3       122.78        35.08       172.66 o
   8   11    3      5150.17       380.31      5390.50 o
   9   11    3      1477.43       191.79      1580.06 o
  10   11    3      4429.09       313.75      4455.56 o
  11   11    3      1912.90       573.42      2797.35 o
  12   11    3       943.23       286.40      1717.27 o
 -13   12    3       828.58       302.11       744.74 o
 -12   12    3      2550.10       408.36      2389.25 o
 -11   12    3      4342.49       505.68      3714.90 o
 -10   12    3      1618.19       315.61      1806.25 o
  -9   12    3      6040.06       564.29      6494.75 o
  -8   12    3      3472.66       281.87      3847.72 o
  -7   12    3      3006.81       232.09      2768.86 o
  -6   12    3      4961.77       397.52      4542.76 o
  -5   12    3      6136.72       442.09      5809.49 o
  -4   12    3       788.46       106.29       624.50 o
  -3   12    3     11113.15       406.29     10557.56 o
  -2   12    3      4360.65       115.89      4379.79 o
  -1   12    3      2099.34       124.56      1911.44 o
   0   12    3     10699.89       331.03     10666.76 o
   1   12    3      1894.88       140.81      1713.13 o
   2   12    3      4649.32       175.98      4365.24 o
   3   12    3     11302.58       413.40     10324.59 o
   4   12    3       652.82        78.25       611.08 o
   5   12    3      6417.52       311.50      6233.10 o
   6   12    3      4403.93       203.24      4373.18 o
   7   12    3      2737.63       131.43      2757.30 o
   8   12    3      3370.01       259.69      3832.85 o
   9   12    3      6032.04       622.71      6606.44 o
  10   12    3      1563.30       506.13      1952.76 o
  11   12    3      2905.78       808.76      3738.10 o
 -13   13    3      2477.64       496.73      2210.88 o
 -11   13    3      1927.98       368.67      1625.70 o
 -10   13    3       913.87       208.05       529.92 o
  -9   13    3       386.75       141.44       437.23 o
  -8   13    3       870.70       171.60       683.30 o
  -7   13    3      3042.76       351.16      2861.18 o
  -6   13    3      1488.03       153.98      1363.09 o
  -5   13    3      3707.68       245.15      3180.96 o
  -4   13    3      6857.61       379.00      6697.79 o
  -3   13    3      1206.74       112.37      1015.06 o
  -2   13    3     11556.42       429.11     12163.88 o
  -1   13    3       344.02        43.40       485.76 o
   0   13    3     10357.40       364.22      9769.35 o
   1   13    3       407.32        83.34       531.30 o
   2   13    3     12588.38       374.50     11872.28 o
   3   13    3       928.49        92.27       935.14 o
   4   13    3      7866.81       320.47      7366.79 o
   5   13    3      3777.15       241.09      3323.52 o
   6   13    3      1231.97        89.38      1137.04 o
   7   13    3      2944.86       201.68      2936.56 o
   8   13    3       504.93       111.35       718.24 o
   9   13    3       720.43       115.45       675.48 o
  10   13    3       403.17       122.30       583.71 o
 -11   14    3      3330.18       742.69      2962.62 o
 -10   14    3      1547.01       384.38      1743.90 o
  -9   14    3      3444.33       323.13      3293.61 o
  -8   14    3      1252.59       165.63      1119.57 o
  -7   14    3      2474.22       260.17      2551.26 o
  -6   14    3      2438.40       265.08      2356.13 o
  -5   14    3      4265.73       280.94      3885.03 o
  -4   14    3      8584.46       424.04      7896.10 o
  -3   14    3      5624.90       335.51      5263.50 o
  -2   14    3      6795.07       303.52      7392.56 o
  -1   14    3       741.83        59.05       616.03 o
   0   14    3      2255.07       142.17      2209.00 o
   1   14    3       448.60        77.26       466.99 o
   2   14    3      7362.41       295.26      6908.93 o
   3   14    3      5563.13       223.30      5130.86 o
   4   14    3      8184.32       298.86      7834.02 o
   5   14    3      4479.61       202.68      4565.70 o
   6   14    3      2386.01       147.92      2448.27 o
   7   14    3      2721.45       159.77      2533.11 o
   8   14    3       736.22       172.73       815.10 o
   9   14    3      3791.97       625.11      3165.19 o
 -11   15    3      1399.14       351.39       912.64 o
  -9   15    3       882.93       170.76       787.92 o
  -8   15    3      2984.21       289.49      2618.37 o
  -7   15    3       600.29       135.74       620.01 o
  -6   15    3      5856.94       389.76      4596.84 o
  -5   15    3      2440.10       292.37      2065.70 o
  -4   15    3      1788.57       206.65      1716.44 o
  -3   15    3     13344.55       874.53     12020.93 o
  -1   15    3      7018.12       328.64      6893.98 o
   0   15    3      3728.66       163.90      3453.91 o
   1   15    3      7171.74       271.02      6778.23 o
   2   15    3       266.61        73.61       109.62 o
   3   15    3     12657.97       441.35     11889.72 o
   4   15    3      1752.37       123.88      1839.55 o
   5   15    3      2289.51       136.66      2302.08 o
   6   15    3      4509.60       330.45      5021.14 o
   7   15    3       450.79        89.87       725.76 o
   8   15    3      2581.48       438.84      2680.13 o
   9   15    3      1181.77       292.19       980.94 o
 -10   16    3      1401.71       568.16      2053.00 o
  -8   16    3      4083.43       406.80      3483.36 o
  -7   16    3      1306.75       366.96      1240.45 o
  -6   16    3      3690.94       330.31      3357.04 o
  -5   16    3       650.19       159.69       518.93 o
  -4   16    3      4632.91       363.04      4010.69 o
  -3   16    3      1052.99       151.86      1012.51 o
  -1   16    3      3533.76       229.11      3603.60 o
   1   16    3      4413.07       235.46      4025.90 o
   2   16    3       215.90        62.70       159.52 o
   3   16    3       755.95       124.89       840.42 o
   4   16    3      3328.19       168.74      3365.16 o
   5   16    3       482.75        62.75       520.30 o
   6   16    3      3519.46       340.92      3219.43 o
   7   16    3      1568.74       286.22      1204.09 o
   8   16    3      4523.48       525.37      3594.00 o
  10   16    3      3107.64       491.08      2234.45 o
  -9   17    3      1264.80       501.76      1861.92 o
  -8   17    3      1492.02       634.02      2165.04 o
  -7   17    3      1206.74       453.05      1451.61 o
  -6   17    3       791.36       237.17       716.10 o
  -5   17    3      1469.51       197.87      1288.81 o
  -4   17    3      2950.47       274.77      2632.72 o
  -3   17    3      3857.94       344.12      3343.15 o
  -2   17    3      8193.66       535.76      7071.13 o
  -1   17    3      4134.16       354.01      4558.95 o
   0   17    3       610.45        80.77       692.74 o
   1   17    3      4569.89       216.34      4424.91 o
   2   17    3      7359.46       369.01      6982.27 o
   3   17    3      2810.12       211.60      2925.73 o
   4   17    3      2274.72       196.95      2595.90 o
   5   17    3      1030.78       256.31      1187.49 o
   6   17    3      1061.94       161.48       934.52 o
   7   17    3      1652.98       398.73      1343.22 o
   8   17    3      2367.56       488.92      2224.07 o
   9   17    3      1405.58       476.05      1592.01 o
  -6   18    3      1423.70       595.97      1830.13 o
  -5   18    3      3593.33       445.56      3616.82 o
  -4   18    3       408.71       146.79       435.14 o
  -3   18    3      1662.79       655.29      1771.57 o
  -2   18    3      2708.89       562.38      2515.02 o
   0   18    3      8722.10       555.98      8208.36 o
   2   18    3      2227.37       180.27      2324.20 o
   3   18    3      1900.88       261.05      1738.06 o
   4   18    3       398.34       166.21       450.29 o
   5   18    3      3562.46       334.78      3379.10 o
   6   18    3      1973.58       368.42      1892.25 o
   7   18    3      2770.13       454.59      2348.37 o
  -5   19    3      1262.35       504.94      1480.71 o
  -4   19    3      1836.91       489.65      1966.92 o
  -3   19    3       304.38       128.48       371.33 o
  -2   19    3      4586.18       403.16      4004.36 o
  -1   19    3       296.63       137.50       357.97 o
   0   19    3      3450.39       660.97      3749.11 o
   1   19    3       473.72       131.82       483.12 o
   2   19    3      4211.96       372.96      4411.62 o
   4   19    3      1699.48       366.00      1718.10 o
   5   19    3      1782.75       339.99      1546.06 o
  -2   20    3       515.81       165.68       568.82 o
  -1   20    3       784.60       175.43       824.84 o
   0    0    4     16364.52       532.64     15732.68 o
   1    0    4       140.13        35.44        51.70 o
   2    0    4     10678.54       309.37     10306.31 o
   3    0    4       107.64        48.55        16.65 o
   4    0    4     69253.27      2272.97     70750.68 o
   5    0    4      3063.68       131.42      2999.75 o
   6    0    4      5347.11       191.24      5559.19 o
   7    0    4      8990.88       381.76      8762.83 o
   8    0    4      4891.73       221.42      4736.19 o
   9    0    4       961.28        83.22       863.18 o
  10    0    4       153.46        60.11       158.26 o
  11    0    4       779.79        98.98       847.97 o
  12    0    4      1457.66       131.38      1237.63 o
  13    0    4      1047.42       140.32      1019.52 o
  14    0    4      3263.00       306.64      2765.71 o
  16    0    4      8470.06       731.57      6715.80 o
 -14    1    4      3124.93       269.31      2837.69 o
 -13    1    4      1477.43       157.40      1439.44 o
 -12    1    4      4068.05       258.99      3855.17 o
 -11    1    4      8912.74       380.09      8073.02 o
 -10    1    4      1051.87       109.37       880.90 o
  -9    1    4     10027.38       375.60      9318.04 o
  -8    1    4      4297.26       173.69      4332.27 o
  -7    1    4     30956.57       877.90     31307.76 o
  -6    1    4     45459.44      1276.62     46255.10 o
  -5    1    4     27112.23       679.93     28130.00 o
  -4    1    4     13440.13       339.09     13442.08 o
  -3    1    4      8044.83       317.90      8454.80 o
  -2    1    4      4290.49       184.83      4395.69 o
  -1    1    4      1067.56        68.58      1028.48 o
   0    1    4      5389.97       186.95      5019.72 o
   1    1    4       915.95        67.69       877.94 o
   2    1    4      4143.02       152.83      4268.01 o
   3    1    4      6724.34       231.39      7269.27 o
   4    1    4     14605.29       341.01     14515.43 o
   5    1    4     27698.97       744.52     28642.18 o
   6    1    4     45657.76      1264.70     47236.68 o
   7    1    4     31174.92       868.84     31488.50 o
   8    1    4      3722.36       163.76      3766.28 o
   9    1    4      8744.61       366.84      8275.54 o
  10    1    4      1466.87       100.16      1197.85 o
  11    1    4      7943.30       527.51      7961.99 o
  12    1    4      3720.26       214.09      3518.86 o
  13    1    4      1881.43       208.96      1744.73 o
  14    1    4      3330.18       381.27      3142.72 o
  15    1    4       486.54       129.79       395.61 o
 -17    2    4      4167.42      1337.31      4157.67 o
 -15    2    4      5367.26       448.74      4507.78 o
 -14    2    4      1395.28       183.81      1325.69 o
 -13    2    4      5726.01       361.94      5209.95 o
 -12    2    4      5712.99       296.51      5264.95 o
 -11    2    4       631.89       106.40       529.00 o
 -10    2    4       462.55        92.51       435.14 o
  -9    2    4       575.26        92.44       575.52 o
  -8    2    4      5928.26       259.65      5879.82 o
  -7    2    4      4220.90       140.85      4393.04 o
  -6    2    4      4399.37       148.36      4479.62 o
  -5    2    4     14864.27       335.63     15552.58 o
  -4    2    4     13680.55       334.06     13794.50 o
  -3    2    4     52302.44      1652.65     51633.47 o
  -2    2    4      9883.17       239.47      9864.46 o
  -1    2    4      8106.68       204.49      8257.36 o
   0    2    4      2811.94       111.31      3231.92 o
   1    2    4      7397.89       245.66      7572.48 o
   2    2    4      8597.21       344.59      8511.91 o
   3    2    4     47792.42      1564.74     47510.92 o
   4    2    4     12731.63       314.51     13158.38 o
   5    2    4     12239.49       350.24     13500.12 o
   6    2    4      3907.26       139.81      3990.45 o
   7    2    4      3653.40       174.71      3631.27 o
   8    2    4      5395.03       260.34      5679.13 o
   9    2    4       575.26       111.42       489.74 o
  10    2    4       410.10        73.17       408.44 o
  11    2    4       802.05       111.10       714.49 o
  12    2    4      5904.44       399.27      5523.46 o
  13    2    4      5746.86       503.47      5307.12 o
  14    2    4      1460.29       193.30      1325.69 o
  15    2    4      5344.59       651.57      4222.40 o
  17    2    4      4969.05      1380.22      4305.98 o
 -16    3    4       484.26       210.52       802.02 o
 -14    3    4       344.65       102.85       401.60 o
 -13    3    4      1056.34       159.93      1057.55 o
 -12    3    4      5981.37       306.05      5192.64 o
 -11    3    4      1987.36       239.31      1922.82 o
 -10    3    4     30576.32      1101.14     28604.96 o
  -9    3    4       262.69        71.39       187.69 o
  -8    3    4     17202.56       609.30     17103.41 o
  -7    3    4      1706.58       147.84      1604.80 o
  -6    3    4      2038.30       160.02      2007.04 o
  -5    3    4      5522.14       245.49      5508.61 o
  -4    3    4     21711.74       405.64     21877.37 o
  -3    3    4      2220.88       136.22      2094.89 o
  -2    3    4     26447.75       643.57     27649.04 o
  -1    3    4      5448.24       193.04      5505.64 o
   0    3    4      1779.85        78.39      1472.26 o
   1    3    4      5202.16       151.40      5378.76 o
   2    3    4     26610.29       813.94     27775.56 o
   3    3    4      2382.65        87.34      2387.30 o
   4    3    4     19461.16       552.06     19563.62 o
   5    3    4      5377.35       136.26      5386.09 o
   6    3    4      1590.63       101.56      1500.01 o
   7    3    4      1365.87        83.94      1267.36 o
   8    3    4     16603.09       470.00     16894.80 o
   9    3    4       121.26        52.29       137.83 o
  10    3    4     28489.14       946.73     27353.85 o
  11    3    4      1776.94       161.01      1861.92 o
  12    3    4      5284.39       327.69      4947.72 o
  13    3    4       952.77       147.64       949.87 o
  14    3    4       352.36       160.84       358.34 o
  16    3    4       608.75       210.56       716.63 o
 -15    4    4      1161.74       202.91      1149.89 o
 -14    4    4       656.34       149.87       694.85 o
 -13    4    4      3071.30       295.59      2722.75 o
 -12    4    4      3314.31       253.58      3176.45 o
 -11    4    4       613.86       121.92       543.82 o
 -10    4    4      2455.42       230.20      2360.02 o
  -9    4    4       411.50        83.07       322.20 o
  -8    4    4     13292.92       559.41     13174.45 o
  -7    4    4      6359.76       312.84      6638.99 o
  -6    4    4     12331.03       466.19     12683.26 o
  -5    4    4      6324.14       262.71      6353.68 o
  -4    4    4       774.04        73.72       713.96 o
  -3    4    4     10614.63       212.72     10918.16 o
  -2    4    4     15252.75       284.74     15013.60 o
  -1    4    4     21348.20       432.39     22013.66 o
   0    4    4     11730.94       268.35     12852.76 o
   1    4    4     22201.23       487.09     22858.42 o
   2    4    4     14713.62       413.23     14299.38 o
   3    4    4     10378.42       276.94     10553.45 o
   4    4    4       596.92        36.15       489.74 o
   5    4    4      6547.74       178.21      6436.85 o
   6    4    4     12569.08       300.92     12834.62 o
   7    4    4      6428.55       217.96      6674.89 o
   8    4    4     12836.68       385.98     12911.78 o
   9    4    4       294.85        64.41       229.52 o
  10    4    4      2259.97       186.49      2219.35 o
  11    4    4       725.05       120.46       618.52 o
  12    4    4      3082.76       240.74      3180.96 o
  13    4    4      3063.68       276.18      2931.14 o
  14    4    4       847.50       144.26       817.39 o
  16    4    4       686.66       179.44       738.75 o
 -15    5    4       795.24       196.99       658.95 o
 -14    5    4       927.44       183.39       930.25 o
 -13    5    4      4308.54       327.52      3483.36 o
 -11    5    4     12178.65       619.00     11286.94 o
 -10    5    4       738.08       131.82       707.03 o
  -9    5    4     19876.19       810.18     19591.60 o
  -7    5    4     16914.92       760.82     17410.80 o
  -6    5    4     12186.25       512.83     13213.50 o
  -5    5    4     21388.44       865.60     21960.28 o
  -3    5    4     35178.23       851.95     35483.26 o
  -2    5    4      5321.98       138.07      5697.23 o
  -1    5    4       518.94        36.06       435.97 o
   1    5    4       281.99        53.16       217.27 o
   2    5    4      6037.39       160.43      6282.15 o
   3    5    4     34452.69       785.63     35302.65 o
   4    5    4       294.85        30.14       302.76 o
   5    5    4     21853.95       452.75     22392.13 o
   6    5    4     12068.77       275.97     13096.51 o
   7    5    4     18710.08       414.21     18988.84 o
   9    5    4     20256.40       695.46     20076.06 o
  10    5    4       693.89       111.49       654.85 o
  11    5    4     11375.87       469.79     11204.22 o
  13    5    4      4335.69       301.36      3811.83 o
  14    5    4       744.64       292.03       974.69 o
  15    5    4       737.15       306.44       666.16 o
 -16    6    4      5246.93       638.11      5195.53 o
 -14    6    4      3241.42       730.76      3881.29 o
 -13    6    4      1350.65       201.08      1503.89 o
 -12    6    4       844.50       173.00       727.38 o
 -11    6    4       784.60       167.72       690.11 o
 -10    6    4       437.73       109.43       440.58 o
  -9    6    4       336.40       101.61       384.16 o
  -8    6    4       563.77       125.01       711.82 o
  -6    6    4      4438.25       295.73      4668.99 o
  -5    6    4       598.61        85.88       543.82 o
  -4    6    4     31345.27      1011.33     33393.91 o
  -3    6    4      9794.43       265.63      9604.00 o
  -2    6    4     39007.62       863.14     39585.08 o
  -1    6    4      5885.95       155.76      5713.85 o
   0    6    4     14216.99       320.04     14409.60 o
   1    6    4      4753.13       135.23      4991.42 o
   2    6    4     37360.28       864.67     39156.49 o
   3    6    4     10526.18       218.89     10506.25 o
   4    6    4     31436.73       579.62     33723.65 o
   5    6    4       660.76        39.80       674.96 o
   6    6    4      4043.95       124.73      4120.36 o
   8    6    4       593.56        55.33       592.92 o
   9    6    4       311.02        76.47       380.64 o
  10    6    4       317.12        72.92       342.62 o
  11    6    4       768.30       124.95       754.05 o
  12    6    4       888.05       111.78       809.40 o
  13    6    4      1403.00       186.90      1526.46 o
  14    6    4      4229.85       284.23      4044.96 o
  15    6    4       366.72       132.45       473.06 o
  16    6    4      5010.37       579.71      5038.16 o
 -15    7    4       888.05       183.56      1047.17 o
 -14    7    4      4654.01       382.65      4756.86 o
 -13    7    4      1184.14       216.70      1137.71 o
 -12    7    4      4223.14       427.12      4075.55 o
 -11    7    4       721.35       206.10       824.26 o
 -10    7    4       689.37       189.73       840.42 o
  -9    7    4      1897.88       244.36      2020.50 o
  -8    7    4      8422.62       426.34      8083.81 o
  -7    7    4      5799.15       343.28      5545.78 o
  -6    7    4     31327.00      1138.94     31545.31 o
  -5    7    4      5828.01       286.34      5941.33 o
  -4    7    4     19107.55       670.69     18741.61 o
  -3    7    4      3777.15       135.35      3520.05 o
  -2    7    4      3249.26        84.35      3005.23 o
  -1    7    4      1776.94        78.33      1534.29 o
   0    7    4      1965.94        91.55      1776.62 o
   1    7    4      1829.55        70.65      1691.68 o
   2    7    4      3370.01        93.89      3120.34 o
   3    7    4      4015.55       218.06      3655.41 o
   4    7    4     18522.27       599.46     18157.56 o
   5    7    4      7335.86       288.84      6999.00 o
   6    7    4     30246.27       610.43     31947.99 o
   7    7    4      5830.64       128.75      5921.30 o
   8    7    4      7848.51       213.40      8069.43 o
   9    7    4      2151.70       119.72      2405.90 o
  10    7    4      1309.24       128.25      1177.86 o
  11    7    4      1039.63       110.95      1040.71 o
  12    7    4      4083.43       255.08      4164.12 o
  13    7    4       873.75       189.19      1015.70 o
  14    7    4      4753.13       322.65      4778.96 o
 -15    8    4      3879.35       424.37      3940.07 o
 -14    8    4       346.57       128.12       343.73 o
 -13    8    4      2832.05       450.49      2908.44 o
 -12    8    4       429.85       153.39       380.25 o
 -11    8    4      1689.56       298.45      1749.75 o
 -10    8    4       798.16       188.60       992.88 o
  -8    8    4      6592.37       556.00      6406.40 o
  -7    8    4       588.54       124.39       499.97 o
  -5    8    4     17987.61       706.12     18252.01 o
  -4    8    4      6139.42       285.81      6241.00 o
  -3    8    4     18214.47       566.59     18523.21 o
  -2    8    4       292.49        36.49       228.01 o
  -1    8    4     38459.06       944.77     37752.49 o
   0    8    4     10519.12       261.17     10219.19 o
   1    8    4     37486.76       832.82     37438.38 o
   2    8    4       347.86        30.16       299.98 o
   3    8    4     17342.76       444.11     18752.56 o
   4    8    4      6365.25       285.52      6683.06 o
   5    8    4     17611.16       694.13     17450.41 o
   7    8    4       594.40       101.51       633.53 o
   8    8    4      6204.30       309.00      6865.78 o
   9    8    4        95.51        30.60        87.80 o
  10    8    4      1101.55        91.37      1173.75 o
  11    8    4      1524.09       141.06      1689.21 o
  12    8    4       236.07        59.74       327.97 o
  13    8    4      2214.40       388.63      2673.92 o
  15    8    4      2527.56      1072.61      3798.26 o
 -15    9    4       444.24       163.91       323.28 o
 -13    9    4      1952.23       267.60      1770.73 o
 -12    9    4      3546.05       659.83      3450.39 o
 -11    9    4      2229.00       220.95      2263.86 o
 -10    9    4      9879.75       749.06      9053.52 o
  -9    9    4      4065.86       296.22      3937.56 o
  -8    9    4      8359.58       484.52      8361.27 o
  -7    9    4      8990.88       437.23      8621.12 o
  -6    9    4       139.72        61.01        35.64 o
  -5    9    4     10294.46       439.92     10100.25 o
  -4    9    4      1590.63       144.10      1549.21 o
  -3    9    4      1274.61        88.45      1280.92 o
  -2    9    4     15624.73       335.51     15645.01 o
  -1    9    4       767.35        56.24       738.75 o
   0    9    4       288.39        37.98       234.40 o
   1    9    4       637.96        51.28       631.52 o
   2    9    4     15091.69       338.19     15030.76 o
   3    9    4       817.72        85.61       952.34 o
   4    9    4      1545.66        82.53      1676.90 o
   5    9    4      9893.44       414.15      9580.49 o
   7    9    4      9473.57       411.97      9267.91 o
   8    9    4      8667.55       490.16      8578.46 o
   9    9    4      3454.44       254.84      3328.14 o
  10    9    4      9594.53       562.90      8809.70 o
  11    9    4      1280.76       116.99      1993.62 o
  12    9    4      2058.55       384.08      3468.03 o
 -14   10    4      1326.73       295.80      1519.44 o
 -12   10    4      5606.85       752.39      5519.00 o
 -11   10    4      1140.73       224.31      1026.56 o
  -9   10    4      1293.11       188.09      1372.70 o
  -8   10    4      4644.63       459.66      4795.56 o
  -7   10    4       973.05       192.14      1083.73 o
  -6   10    4      9046.43       523.67      8847.28 o
  -5   10    4       600.29        95.27       575.52 o
  -4   10    4      2093.04       187.34      1910.56 o
  -3   10    4      1029.67       111.52       874.38 o
  -2   10    4      9811.46       248.82     10504.20 o
  -1   10    4      4410.79       141.69      4522.56 o
   0   10    4     37706.95       948.85     37768.04 o
   1   10    4      3978.56       112.87      4253.65 o
   2   10    4     11000.98       371.75     11170.38 o
   3   10    4      1042.97        84.46       912.04 o
   4   10    4      1586.51       128.84      1436.41 o
   5   10    4       431.99        98.70       463.11 o
   6   10    4      9026.81       398.87      8828.48 o
   7   10    4      1355.72       136.84      1370.48 o
   8   10    4      3972.05       347.00      4189.97 o
   9   10    4       891.13       137.65      1081.09 o
  12   10    4      5933.56       485.08      5487.85 o
  14   10    4       729.69       316.98      1620.06 o
 -13   11    4      1157.06       368.71      1009.97 o
 -12   11    4       412.20       139.73       498.63 o
 -11   11    4      7154.27       855.72      7310.25 o
 -10   11    4      2725.04       458.06      2469.10 o
  -9   11    4     10646.56       884.11     10838.89 o
  -8   11    4       921.17       134.73       954.81 o
  -7   11    4      8864.08       466.53      8535.91 o
  -6   11    4       315.28        72.71       227.10 o
  -5   11    4      1143.05       120.99      1121.58 o
  -4   11    4       678.57       103.08       453.69 o
  -3   11    4      5632.65       263.43      5266.40 o
  -2   11    4      4694.01       148.53      5015.47 o
  -1   11    4      4043.95       142.24      4017.02 o
   0   11    4       387.43        47.41       367.87 o
   1   11    4      3745.49       168.48      3798.26 o
   2   11    4      4947.24       225.09      4916.81 o
   3   11    4      5259.40       222.11      5149.50 o
   4   11    4       408.71        98.09       317.55 o
   5   11    4      1457.66        90.65      1337.36 o
   7   11    4      8938.75       400.17      8493.47 o
   8   11    4       935.85       169.48      1064.06 o
   9   11    4     10760.49       531.87     10675.02 o
  10   11    4      2484.50       545.44      2945.23 o
  11   11    4      8568.52       834.55      7786.30 o
  12   11    4       366.72       114.00       566.92 o
  13   11    4       691.18       180.94       949.26 o
 -13   12    4      1991.96       546.75      2215.58 o
 -11   12    4      2021.25       426.99      2024.10 o
 -10   12    4       390.14       108.07       551.78 o
  -8   12    4      3980.73       466.79      3991.71 o
  -7   12    4      4162.98       348.58      4020.83 o
  -6   12    4       726.91       115.04       759.55 o
  -5   12    4      2357.52       233.91      2281.97 o
  -4   12    4      8536.70       429.22      8366.76 o
  -3   12    4      3630.56       211.49      3497.54 o
  -2   12    4      5537.50       161.32      6231.52 o
  -1   12    4     19355.70       459.60     19237.69 o
   0   12    4      1547.01        85.27      1513.99 o
   1   12    4     19735.75       604.28     19307.10 o
   2   12    4      6489.39       277.21      6432.04 o
   3   12    4      3680.49       206.68      3448.04 o
   4   12    4      9614.76       357.66      9044.01 o
   5   12    4      2804.65       165.84      2655.34 o
   6   12    4       501.07       101.68       619.01 o
   7   12    4      4057.09       263.02      3845.24 o
   8   12    4      3682.58       355.00      3900.00 o
   9   12    4       297.81       120.55       247.43 o
  10   12    4       282.57        93.71       513.02 o
  11   12    4      1267.25       388.32      2061.16 o
 -13   13    4       594.40       262.59       509.86 o
 -12   13    4      4971.47       548.34      3772.42 o
 -10   13    4      1732.26       479.79      1936.88 o
  -9   13    4       347.86       121.30       261.15 o
  -8   13    4      8893.26       765.85      8673.20 o
  -7   13    4      1303.02       214.89      1250.33 o
  -6   13    4     16005.54      1075.31     14118.19 o
  -4   13    4      6544.95       425.94      6237.84 o
  -3   13    4      1329.24       134.24      1243.27 o
  -1   13    4       352.36        58.14       335.62 o
   0   13    4       342.74        66.25       275.89 o
   1   13    4       307.99        57.98       347.45 o
   3   13    4      1277.07       120.51      1276.63 o
   4   13    4      6792.23       289.27      6371.23 o
   6   13    4     14451.83       686.70     14125.32 o
   7   13    4      1215.12       135.55      1235.52 o
   8   13    4      8051.00       771.91      8407.06 o
  10   13    4      1182.95       310.09      1829.27 o
 -11   14    4       733.42       250.68       446.48 o
  -9   14    4       882.93       223.93       793.55 o
  -8   14    4       596.92       182.44       487.53 o
  -6   14    4      1162.92       147.86      1146.50 o
  -5   14    4      5568.27       333.81      4961.79 o
  -4   14    4      8558.97       477.53      7645.75 o
  -3   14    4     12392.24       455.85     11457.56 o
  -2   14    4      7321.13       397.49      7123.36 o
  -1   14    4      9450.14       367.97      9763.42 o
   0   14    4       342.74       102.57       216.38 o
   1   14    4      9396.69       333.57      9202.56 o
   2   14    4      7836.32       322.90      7096.38 o
   3   14    4     11026.26       357.73     10543.18 o
   4   14    4      8262.33       337.81      7509.96 o
   5   14    4      5872.75       279.53      5464.17 o
   6   14    4      1083.36        98.54      1229.20 o
   9   14    4       588.54       103.52       782.88 o
 -11   15    4      1290.63       360.98      2018.70 o
 -10   15    4      2543.16       362.69      2885.84 o
  -9   15    4      4675.17       522.34      4784.49 o
  -8   15    4      1801.69       274.60      1646.74 o
  -7   15    4      9621.51       627.82      7987.00 o
  -5   15    4      9072.64       429.38      8231.93 o
  -4   15    4       635.36       116.23       544.76 o
  -3   15    4       852.52       160.76       937.58 o
  -2   15    4       974.13       161.10       794.68 o
  -1   15    4       188.04        53.32       331.60 o
   0   15    4       178.72        72.23       150.06 o
   1   15    4       398.34        72.11       385.34 o
   2   15    4      1012.08       104.00      1035.55 o
   3   15    4      1076.57        99.36       987.84 o
   4   15    4       718.58        94.09       700.66 o
   5   15    4      8060.27       315.12      8330.21 o
   7   15    4      7534.66       893.11      8172.16 o
   8   15    4      2042.97       340.62      1631.35 o
   9   15    4      5689.61       667.08      4905.60 o
  10   15    4      3578.91       487.89      2918.16 o
 -10   16    4       406.63       149.88       320.41 o
  -8   16    4       317.73       122.68       324.00 o
  -6   16    4      1807.54       225.30      1708.17 o
  -4   16    4      1178.22       203.16      1080.44 o
  -3   16    4       844.50       187.00       862.60 o
  -2   16    4      9746.81       536.77      8917.02 o
  -1   16    4       110.15        50.56       104.45 o
   0   16    4      9787.62       517.47      9609.88 o
   2   16    4      9214.12       393.07      8777.82 o
   3   16    4       604.51        93.91       648.72 o
   4   16    4      1534.86       165.82      1282.36 o
   5   16    4       368.70        75.99       342.99 o
   6   16    4      1174.68       153.32      1668.72 o
   9   16    4       466.26       196.91       193.77 o
  -9   17    4      6772.39       736.28      5830.85 o
  -7   17    4      1393.99       522.91      1738.06 o
  -6   17    4       574.44       189.69       609.10 o
  -5   17    4      1036.31       231.52      1099.59 o
  -4   17    4       937.95       171.78       876.75 o
  -3   17    4      4841.32       373.51      4081.93 o
  -1   17    4       804.98       168.90       897.60 o
   0   17    4      1141.89       101.17      1454.66 o
   1   17    4       943.23       133.16       949.87 o
   2   17    4      2364.21       284.44      1912.31 o
   3   17    4      4342.49       260.78      4093.44 o
   4   17    4       633.62       122.13       859.08 o
   5   17    4      1073.19       224.33      1296.72 o
   6   17    4       575.26       240.17       601.23 o
   7   17    4      1909.89       326.34      1770.73 o
   8   17    4      2382.65       398.09      1792.68 o
   9   17    4      7168.83       815.80      5739.58 o
  -4   18    4       873.75       344.82      1255.99 o
  -3   18    4      2281.29       621.27      2589.79 o
  -2   18    4      1397.85       416.85      1746.40 o
  -1   18    4     10878.60       606.56     10108.29 o
   1   18    4      9668.83       659.81     10213.12 o
   2   18    4      1639.02       149.07      1870.56 o
   3   18    4      2047.64       177.51      2564.41 o
   4   18    4      1132.61       186.45      1143.79 o
   5   18    4      1480.08       264.77      1842.13 o
   7   18    4      1608.52       343.65      1470.72 o
  -3   19    4      1058.58       377.31      1530.37 o
  -1   19    4       936.90       260.16      1095.61 o
   1   19    4       840.51       209.50      1043.29 o
   3   19    4      1514.70       229.01      1702.39 o
   4   19    4      2162.88       275.26      2238.24 o
  -1   20    4       422.74       172.64       436.81 o
   0   20    4      1717.97       493.50      2113.24 o
   1    0    5      6226.00       203.64      6017.10 o
   2    0    5      2018.16       117.49      2042.14 o
   3    0    5     38621.19      1406.62     38419.92 o
   4    0    5     16202.05       582.56     15873.48 o
   5    0    5     29715.98       735.56     30576.02 o
   6    0    5      4532.74       157.54      4614.48 o
   7    0    5       125.46        47.79        85.19 o
   8    0    5      7018.12       288.28      7270.97 o
   9    0    5      2506.84       167.12      2307.84 o
  10    0    5      5540.06       291.99      5345.07 o
  12    0    5      1807.54       206.28      1747.24 o
  14    0    5       834.53       201.80       567.87 o
  15    0    5      6698.96       495.70      5477.48 o
 -14    1    5      1388.86       215.45      1273.78 o
 -13    1    5      3531.72       492.85      3450.39 o
 -12    1    5      8527.16       543.37      8082.01 o
 -11    1    5      2734.03       233.91      2734.24 o
 -10    1    5      4848.50       366.60      4340.17 o
  -9    1    5       732.49       108.03       600.74 o
  -8    1    5     11552.72       377.26     11252.97 o
  -7    1    5     13091.36       377.98     13663.27 o
  -6    1    5     11593.44       303.82     11946.49 o
  -5    1    5     24654.84       578.14     24727.56 o
  -4    1    5     18024.55       637.55     17771.56 o
  -3    1    5       349.14        59.80       303.46 o
  -2    1    5      2097.77       100.87      2099.47 o
  -1    1    5      2364.21       110.43      2420.64 o
   0    1    5      1944.64       110.78      1906.20 o
   1    1    5      2159.69       118.34      2168.76 o
   2    1    5      1791.48       100.50      1785.91 o
   4    1    5     17757.60       600.71     17524.46 o
   5    1    5     25088.99       599.56     25296.90 o
   6    1    5     11760.77       358.25     12352.10 o
   7    1    5     12008.36       407.25     12570.89 o
   8    1    5     11449.39       390.30     11142.91 o
   9    1    5       576.09        90.03       470.46 o
  10    1    5      3847.26       247.59      3562.90 o
  11    1    5      2708.89       252.53      2730.06 o
  12    1    5      8454.23       537.88      8271.90 o
  13    1    5      4267.98       375.43      3660.25 o
  14    1    5      1448.48       394.21      1653.24 o
 -16    2    5      1887.40       865.59      3497.54 o
 -14    2    5      4178.53       358.13      3210.36 o
 -13    2    5      1192.44       199.63      1105.56 o
 -12    2    5      3286.63       293.94      3140.48 o
 -11    2    5      4791.17       433.50      4751.34 o
  -9    2    5      3225.76       244.30      2970.25 o
  -8    2    5      2602.50       122.88      2472.08 o
  -7    2    5      5037.20       156.31      5539.82 o
  -6    2    5     12163.47       330.18     11896.26 o
  -5    2    5      3280.72       143.88      3439.82 o
  -4    2    5     12205.25       547.44     12631.51 o
  -3    2    5      3368.01       133.80      3679.64 o
  -2    2    5     20148.80       542.19     20266.37 o
  -1    2    5     29906.11       850.97     30439.78 o
   0    2    5     19910.17       548.68     19630.81 o
   1    2    5     28396.28       788.62     28852.42 o
   2    2    5     20492.17       527.08     21007.60 o
   3    2    5      4107.65       163.20      4295.49 o
   4    2    5     13233.48       368.15     13912.20 o
   5    2    5      3177.09       108.62      3505.82 o
   6    2    5     10611.09       358.02     10679.16 o
   7    2    5      5259.40       359.36      5843.07 o
   8    2    5      2520.65       141.67      2253.40 o
   9    2    5      3340.11       192.91      3214.89 o
  11    2    5      5780.82       269.48      5288.20 o
  12    2    5      3173.21       213.23      2946.32 o
  13    2    5      1481.40       201.32      1371.96 o
  14    2    5      2607.77       961.22      2965.89 o
 -14    3    5      3474.69       801.23      3337.37 o
 -13    3    5      1101.55       219.28      1225.70 o
 -12    3    5      1126.82       257.59      1487.64 o
 -11    3    5     11262.38       639.08     10279.93 o
 -10    3    5       388.79       119.42       414.53 o
  -9    3    5     15736.77       712.27     15065.11 o
  -8    3    5       733.42       122.08       563.11 o
  -7    3    5      5653.33       326.00      5458.25 o
  -6    3    5      3517.42       100.00      3811.83 o
  -5    3    5      4920.65       219.66      5015.47 o
  -4    3    5     11918.03       477.10     12269.99 o
  -3    3    5     20129.27       566.33     20209.47 o
  -2    3    5     19605.44       515.55     19726.20 o
  -1    3    5      8792.94       267.82      9397.36 o
   0    3    5      6834.84       244.66      7118.30 o
   1    3    5      8476.40       256.62      8941.59 o
   2    3    5     19590.99       563.53     19768.36 o
   3    3    5     18391.37       616.00     18390.07 o
   4    3    5     11985.75       323.99     12467.96 o
   5    3    5      3460.51       133.60      3762.60 o
   6    3    5      3870.78       124.17      3911.25 o
   7    3    5      5591.40       192.98      5279.48 o
   8    3    5       577.74        69.48       479.17 o
   9    3    5     15487.39       526.74     14903.53 o
  10    3    5       477.47        79.70       495.51 o
  11    3    5     10639.46       489.82      9986.00 o
  12    3    5      1473.47       154.55      1402.50 o
  13    3    5      1330.49       174.47      1335.90 o
  14    3    5      4107.65       319.79      3419.91 o
  16    3    5       905.57       399.71      1262.38 o
 -14    4    5      2662.53       296.53      2809.00 o
 -13    4    5      2773.75       268.22      2538.14 o
 -12    4    5      4445.13       406.08      4428.90 o
 -11    4    5      3286.63       372.85      2704.00 o
 -10    4    5       758.79       155.46       701.72 o
  -9    4    5      2412.98       224.82      2020.50 o
  -8    4    5      1779.85       185.82      1440.20 o
  -7    4    5     18771.32       848.63     18936.51 o
  -6    4    5      2560.54       236.81      2473.07 o
  -5    4    5       590.22       100.32       615.04 o
  -4    4    5     10846.33       232.95     11340.12 o
  -3    4    5      4413.07       160.02      4398.34 o
  -2    4    5     18804.33       523.78     19085.42 o
  -1    4    5     20798.72       535.97     21272.22 o
   0    4    5     29989.48       792.57     30930.26 o
   1    4    5     19499.59       518.96     19670.06 o
   2    4    5     18714.78       583.73     19160.10 o
   3    4    5      4254.50       172.83      4294.18 o
   4    4    5     12914.78       316.76     12993.72 o
   5    4    5       749.34        66.88       627.00 o
   6    4    5      2623.61       118.09      2512.01 o
   7    4    5     19379.64       512.57     19897.92 o
   8    4    5      1031.88        86.22       859.66 o
   9    4    5      2541.42       161.33      2326.13 o
  10    4    5       595.24       104.10       453.69 o
  11    4    5      2773.75       188.48      2684.28 o
  12    4    5      4807.86       286.32      4629.44 o
  13    4    5      2646.57       290.33      2526.07 o
  14    4    5      2289.51       750.82      2673.92 o
 -15    5    5      1626.51       223.44      1815.61 o
 -14    5    5       840.51       187.56       823.12 o
 -13    5    5      2019.70       296.92      1839.55 o
 -12    5    5      4041.76       376.28      3475.10 o
 -10    5    5     16955.23       936.48     15740.21 o
  -9    5    5       664.30       148.12       618.52 o
  -8    5    5     17679.73       883.07     17495.35 o
  -7    5    5      8246.70       437.49      8241.01 o
  -6    5    5     12178.65       577.22     12243.42 o
  -5    5    5      5162.53       321.42      5321.70 o
  -4    5    5     25138.07       600.15     25830.92 o
  -3    5    5     42522.36       972.14     42213.81 o
  -2    5    5      4356.11       115.83      4933.66 o
  -1    5    5     13052.01       294.85     13204.31 o
   0    5    5      6514.37       174.98      6074.64 o
   1    5    5     13004.88       306.09     13402.69 o
   2    5    5      4090.03       151.85      4494.36 o
   3    5    5     42295.60      1160.63     42543.19 o
   4    5    5     23713.05       646.48     23672.90 o
   5    5    5      4966.62       157.63      5173.92 o
   6    5    5     13071.68       338.35     13142.33 o
   7    5    5      7681.73       229.22      7516.89 o
   8    5    5     19322.20       602.70     19082.66 o
   9    5    5       800.10        82.74       752.40 o
  10    5    5     16193.29       643.70     15667.53 o
  11    5    5       147.97        65.30       145.68 o
  12    5    5      3819.57       270.09      3672.36 o
  13    5    5      1412.04       215.94      1538.99 o
  14    5    5       859.57       185.63       944.95 o
 -15    6    5      4729.44       411.77      4456.90 o
 -14    6    5       482.00       132.96       282.91 o
 -13    6    5      1263.58       227.52      1151.92 o
 -12    6    5      2291.16       336.01      2410.81 o
 -11    6    5       829.57       206.15       839.84 o
 -10    6    5      4090.03       415.94      4003.09 o
  -9    6    5      1349.39       184.55      1186.80 o
  -8    6    5      5425.40       430.89      5400.78 o
  -7    6    5       831.55       156.78       821.40 o
  -6    6    5      3153.85       212.58      3332.75 o
  -5    6    5     15771.32       596.37     16848.04 o
  -4    6    5      6021.36       253.67      5935.16 o
  -3    6    5     37867.49       810.25     38278.92 o
  -2    6    5      8641.94       207.93      8731.03 o
  -1    6    5      3346.08       107.49      3451.56 o
   0    6    5      3316.29       134.75      3637.30 o
   1    6    5      2835.72       131.94      3044.83 o
   2    6    5      8416.31       214.67      8595.14 o
   3    6    5     35385.07       893.28     36294.06 o
   4    6    5      5524.70       207.18      5539.82 o
   5    6    5     16092.73       362.32     17213.44 o
   6    6    5      3140.34       104.13      3725.88 o
   7    6    5      1212.73        80.29      1159.40 o
   8    6    5      5379.87       164.06      5530.90 o
   9    6    5      1470.83       112.18      1389.05 o
  10    6    5      3775.04       226.23      3918.76 o
  11    6    5       998.99        95.71       938.81 o
  12    6    5      2595.48       208.62      2527.07 o
  13    6    5      1003.34       210.37      1242.56 o
  14    6    5       301.98       107.64       347.45 o
  15    6    5      3881.49       791.09      4205.52 o
 -15    7    5       725.05       218.67       625.00 o
 -13    7    5      3044.66       377.85      2764.66 o
 -12    7    5      3217.95       513.39      3247.86 o
 -11    7    5      1627.90       304.06      1904.45 o
 -10    7    5      1524.09       247.19      1516.32 o
  -9    7    5      1174.68       183.99      1058.20 o
  -8    7    5      3967.72       361.98      3668.72 o
  -7    7    5     16062.19       763.20     16225.66 o
  -6    7    5      4964.20       305.49      4907.00 o
  -5    7    5     29644.84      1143.49     29645.95 o
  -4    7    5      3464.56       182.29      3628.86 o
  -3    7    5      1023.06        40.72      1051.06 o
  -2    7    5      1586.51        80.87      1968.70 o
  -1    7    5      4748.39       147.02      4730.69 o
   0    7    5       225.10        44.40       309.06 o
   1    7    5      5044.53       141.76      5129.42 o
   2    7    5      1386.30        96.09      1867.97 o
   3    7    5       855.54        41.27       932.69 o
   4    7    5      3184.85        71.85      3606.00 o
   5    7    5     28101.32       571.08     29199.97 o
   6    7    5      4586.18       123.51      4820.52 o
   7    7    5     15555.99       334.77     16368.64 o
   8    7    5      3741.28       117.87      3787.17 o
   9    7    5      1406.87       141.98      1395.77 o
  10    7    5      1759.58       115.48      1681.82 o
  11    7    5      1865.04       135.23      1896.60 o
  12    7    5      3388.01       218.32      3684.49 o
  13    7    5      2151.70       384.69      2736.34 o
  14    7    5      1685.32       187.89      2037.62 o
 -15    8    5       459.60       154.92       445.21 o
 -14    8    5      2581.48       388.14      2094.89 o
 -13    8    5      1876.95       292.20      1938.64 o
 -12    8    5      1494.68       208.87      1411.50 o
 -11    8    5      4331.16       396.32      4162.83 o
 -10    8    5       784.60       257.36       922.34 o
  -9    8    5      2821.07       310.71      2645.04 o
  -8    8    5      1582.40       183.43      1813.06 o
  -7    8    5      8029.40       518.03      8013.83 o
  -6    8    5      5000.63       316.34      4780.34 o
  -5    8    5      6840.53       412.68      6860.81 o
  -4    8    5     15041.00       578.18     15358.64 o
  -3    8    5      4516.54       106.38      4579.23 o
  -2    8    5     17297.47       429.95     17545.65 o
  -1    8    5      3693.03       142.20      3844.00 o
   0    8    5      7711.92       247.80      8157.70 o
   1    8    5      3969.89       164.78      4074.27 o
   2    8    5     17392.65       426.59     17819.58 o
   3    8    5      4319.84       260.10      4180.92 o
   4    8    5     14414.62       516.43     15197.96 o
   5    8    5      7324.08       318.05      7231.80 o
   6    8    5      4658.71       270.10      4640.33 o
   7    8    5      7247.71       483.38      7226.70 o
   8    8    5      1532.16        71.39      1906.20 o
   9    8    5      2565.77       123.76      2751.00 o
  10    8    5       963.42        96.13       890.43 o
  11    8    5      3511.30       248.77      3962.70 o
  12    8    5       867.66       113.53      1281.64 o
  13    8    5       716.74       160.30      1690.85 o
 -14    9    5      1280.76       304.18       977.81 o
 -13    9    5       775.95       214.72       821.97 o
 -12    9    5      1859.10       262.62      2000.77 o
 -11    9    5      4576.87       458.62      4556.25 o
 -10    9    5      4390.24       460.57      4090.88 o
  -9    9    5      8896.50       769.23      9181.47 o
  -8    9    5      2929.94       262.63      3064.73 o
  -7    9    5      2732.23       215.84      2508.01 o
  -6    9    5     16259.04       741.54     15853.33 o
  -5    9    5       220.99        79.29       185.23 o
  -4    9    5      4753.13       251.48      4598.20 o
  -3    9    5      5726.01       216.12      5779.04 o
  -2    9    5      2196.62        93.54      2033.11 o
  -1    9    5      6696.15       205.56      6655.30 o
   0    9    5      2674.97       151.28      2677.03 o
   1    9    5      6715.87       208.68      6674.89 o
   2    9    5      1829.55        86.84      1768.20 o
   3    9    5      5968.07       308.37      5976.84 o
   4    9    5      4205.27       245.47      4113.94 o
   5    9    5       343.38        82.90       394.42 o
   6    9    5     16683.00       764.48     15730.18 o
   7    9    5      2489.64       197.45      2363.90 o
   8    9    5      2479.35       248.45      2478.05 o
   9    9    5      8683.58       471.38      8710.49 o
  10    9    5      3490.94       398.50      3666.30 o
  11    9    5      3414.10       412.19      4603.62 o
 -14   10    5       637.96       290.30      1015.06 o
 -13   10    5      3967.72       810.67      4354.68 o
 -12   10    5      2339.18       502.62      2242.02 o
 -11   10    5      1386.30       322.87      1215.22 o
 -10   10    5      2396.11       296.46      2580.64 o
  -9   10    5      1996.57       269.08      2003.46 o
  -8   10    5      3636.78       390.14      3501.09 o
  -7   10    5      5849.04       394.76      6282.15 o
  -6   10    5     10238.67       522.29     10192.92 o
  -5   10    5      1719.39       149.82      1779.15 o
  -4   10    5      4705.80       266.74      4540.06 o
  -3   10    5      2325.88       175.91      2388.28 o
  -2   10    5      2362.53       142.17      2439.37 o
  -1   10    5     16514.53       566.04     16757.30 o
   0   10    5      6960.58       238.29      6999.00 o
   1   10    5     16789.84       454.80     17056.36 o
   2   10    5      2404.53        96.18      2261.95 o
   3   10    5      2169.29       160.27      2141.84 o
   4   10    5      4877.30       283.58      5053.79 o
   5   10    5      1151.21       204.32      1292.40 o
   6   10    5      9729.83       556.67      9508.20 o
   7   10    5      6732.80       341.65      6812.85 o
   8   10    5      3414.10       293.56      3559.32 o
   9   10    5      2110.40       202.35      2107.73 o
  10   10    5      2671.41       327.26      2723.80 o
  11   10    5      1020.86       373.82      1378.64 o
 -13   11    5       950.64       304.50      1000.46 o
 -12   11    5      2108.81       483.55      2683.24 o
 -11   11    5       831.55       173.65       875.57 o
 -10   11    5      5679.23       599.04      5374.36 o
  -9   11    5      3251.22       282.54      3203.56 o
  -8   11    5      9326.77       568.28      9106.88 o
  -6   11    5      1103.84       141.77       911.44 o
  -5   11    5      1540.25       180.97      1450.09 o
  -4   11    5      4937.56       256.31      4462.24 o
  -3   11    5      5812.26       529.94      6037.29 o
  -2   11    5      5739.03       195.52      6185.82 o
  -1   11    5      5697.40       238.96      5698.74 o
   0   11    5       179.65        46.12       153.02 o
   1   11    5      5746.86       200.87      5814.06 o
   2   11    5      6651.17       297.48      6501.20 o
   3   11    5      4774.51       297.22      4966.02 o
   4   11    5      3961.22       288.05      3695.42 o
   5   11    5      2018.16       233.43      1970.47 o
   6   11    5       852.52       155.73       743.65 o
   8   11    5     10280.50       603.61      9457.56 o
   9   11    5      3073.21       267.07      3203.56 o
  10   11    5      6450.64       536.17      5739.58 o
  11   11    5       655.46       259.89       880.90 o
  12   11    5      1719.39       597.86      3012.91 o
  13   11    5       469.98       163.38      1108.22 o
 -13   12    5      1036.31       315.71       974.06 o
 -12   12    5      2928.08       413.38      2157.60 o
 -11   12    5      1430.20       199.11      1350.56 o
 -10   12    5      2571.00       300.11      2740.52 o
  -9   12    5      1346.86       265.20      1096.27 o
  -8   12    5      1811.93       213.86      1796.91 o
  -7   12    5      3998.12       298.09      3858.89 o
  -6   12    5      1050.76       130.51       938.20 o
  -5   12    5      5289.39       277.80      4971.66 o
  -4   12    5       782.68       153.07       763.97 o
  -3   12    5      8026.32       394.61      7291.45 o
  -2   12    5      6715.87       313.02      7007.36 o
  -1   12    5      1376.06       131.48      1454.66 o
   0   12    5     14012.58       386.98     13961.79 o
   1   12    5      1517.38        83.11      1534.29 o
   2   12    5      6749.76       271.40      6376.02 o
   3   12    5      7983.22       412.00      7366.79 o
   4   12    5      1175.86       164.02      1087.02 o
   5   12    5      4717.61       380.53      4393.04 o
   6   12    5       876.81       140.61       873.79 o
   7   12    5      3898.66       277.17      3962.70 o
   8   12    5      1944.64       229.14      1934.24 o
   9   12    5      1321.72       161.38      1213.13 o
  10   12    5      2113.56       474.60      2656.37 o
  11   12    5       860.58       171.61      1022.72 o
  12   12    5      1301.78       394.82      2170.63 o
 -12   13    5       627.57       267.24       587.58 o
 -11   13    5      1981.23       356.88      1668.72 o
  -9   13    5      1460.29       276.15      1308.27 o
  -7   13    5     12817.20       701.24     12230.15 o
  -6   13    5      4964.20       419.44      4383.76 o
  -5   13    5      7708.90       558.94      7298.28 o
  -4   13    5      1239.23       174.44      1133.00 o
  -3   13    5      1056.34       112.96       998.56 o
  -2   13    5      3182.91       232.97      2909.52 o
  -1   13    5       123.16        41.24        84.64 o
   0   13    5      9723.04       264.66      9557.02 o
   1   13    5       119.37        50.38       105.47 o
   2   13    5      3490.94       195.18      3485.72 o
   3   13    5       937.95       221.31      1053.00 o
   4   13    5      1295.58       168.45      1139.06 o
   5   13    5      8530.34       530.76      7724.65 o
   6   13    5      4174.08       309.03      4217.20 o
   7   13    5     11660.23       683.71     11870.10 o
   9   13    5      1004.43       314.09      1164.86 o
  11   13    5      1201.96       367.45      1856.75 o
 -11   14    5      1109.56       459.64       729.00 o
 -10   14    5       825.61       361.88      1258.83 o
  -9   14    5      2107.23       524.44      1827.56 o
  -8   14    5      2399.48       298.35      2223.12 o
  -7   14    5      2510.29       343.10      2253.40 o
  -6   14    5      1536.20       238.73      1488.42 o
  -5   14    5      3414.10       440.33      3505.82 o
  -4   14    5     13024.51       593.00     11711.57 o
  -3   14    5      5281.89       325.12      5019.72 o
  -2   14    5      6163.71       318.79      5904.39 o
  -1   14    5      1686.73       144.15      1576.88 o
   0   14    5      6223.29       274.18      6126.19 o
   1   14    5      2021.25       126.86      1887.90 o
   2   14    5      6215.15       298.41      6032.63 o
   3   14    5      5000.63       296.87      5312.95 o
   4   14    5     12942.17       661.59     11979.30 o
   5   14    5      4299.51       349.74      3918.76 o
   6   14    5      1497.34       230.36      1381.61 o
   7   14    5      2602.50       275.61      2413.76 o
   8   14    5      1768.25       205.48      2290.58 o
   9   14    5      1458.97       251.05      1659.75 o
 -11   15    5      1257.47       366.08      1120.91 o
 -10   15    5      1505.34       316.42      1332.25 o
  -9   15    5      1643.21       311.07      1540.56 o
  -8   15    5      4630.57       470.67      4308.61 o
  -7   15    5      1702.31       220.07      1720.59 o
  -6   15    5      9383.35       550.00      8188.44 o
  -5   15    5       603.67       129.36       452.84 o
  -4   15    5      4475.01       372.92      4003.09 o
  -3   15    5      3672.15       235.63      3488.08 o
  -2   15    5      3025.71       230.93      3064.73 o
  -1   15    5      3622.27       281.66      3322.37 o
   0   15    5       254.94        95.05       265.36 o
   1   15    5      3372.01       193.83      3061.41 o
   2   15    5      3021.92       200.52      3052.56 o
   3   15    5      3632.63       207.40      3742.99 o
   4   15    5      4484.22       315.69      4319.12 o
   5   15    5       424.16       138.91       359.86 o
   6   15    5      7815.01       574.95      7881.89 o
   7   15    5      1381.18       291.58      1469.96 o
   8   15    5      2959.82       589.72      4058.96 o
   9   15    5      1906.89       413.23      1521.78 o
  10   15    5      1582.40       366.85      1461.53 o
  11   15    5      1251.38       356.67       957.90 o
 -10   16    5       967.69       249.42       969.70 o
  -8   16    5      4944.82       479.12      4431.56 o
  -7   16    5       829.57       363.74      1265.94 o
  -6   16    5      1480.08       436.87      1911.44 o
  -5   16    5       781.71       155.86       942.49 o
  -4   16    5      2907.63       237.51      2757.30 o
  -3   16    5      2569.25       286.05      2360.02 o
  -2   16    5       455.92       117.56       398.80 o
  -1   16    5     12308.11       656.64     10695.70 o
   1   16    5     12650.23       514.76     11312.45 o
   2   16    5       359.50       100.48       396.01 o
   3   16    5      2479.35       222.75      2661.53 o
   4   16    5      2541.42       227.25      2730.06 o
   5   16    5       935.85       109.48      1060.15 o
   6   16    5      1547.01       207.08      1904.45 o
   7   16    5      1377.34       266.91      1202.70 o
   8   16    5      4990.90       600.46      4456.90 o
  10   16    5      1106.13       325.03       932.69 o
  -8   17    5      1678.26       511.73      2072.07 o
  -3   17    5      1530.81       519.70      2098.56 o
  -2   17    5      1253.81       235.17      1395.77 o
  -1   17    5      1567.38       504.07      2157.60 o
   0   17    5      1662.79       158.56      1947.46 o
   1   17    5      1662.79       171.19      1947.46 o
   2   17    5      1911.40       144.43      1749.75 o
   3   17    5      2005.81       180.31      2098.56 o
   4   17    5      1508.01       430.29      2259.10 o
   5   17    5       454.45        94.63       665.64 o
   8   17    5      2669.64       396.49      2106.81 o
  -3   18    5       562.13       196.62       864.36 o
  -2   18    5      6343.31       526.21      5455.30 o
  -1   18    5       342.10       131.75       174.24 o
   0   18    5      6897.57       551.58      6237.84 o
   2   18    5      5095.99       363.56      5575.61 o
   3   18    5       588.54       119.38       821.97 o
   4   18    5       832.54       343.54       789.61 o
   6   18    5      1365.87       484.54      1695.79 o
   7   18    5      1586.51       341.29      1604.80 o
  -3   19    5       775.95       285.65      1103.57 o
  -2   19    5      1968.99       722.24      2362.93 o
  -1   19    5       438.45       141.95       592.44 o
   0   19    5      1968.99       630.63      3412.90 o
   2   19    5      1715.12       228.02      2127.98 o
   3   19    5       915.95       256.20      1075.84 o
   4   19    5       875.79       282.08       646.18 o
   0    0    6      2987.97       316.01      2211.82 o
   1    0    6      3336.14       174.91      3583.22 o
   2    0    6     20007.40       598.69     18826.58 o
   3    0    6     37001.98      1112.05     35948.16 o
   4    0    6     16329.32      1020.17     17368.60 o
   5    0    6     15676.39       491.17     16108.69 o
   7    0    6     14323.87       477.74     14061.22 o
   8    0    6      1490.69       127.55      1565.78 o
   9    0    6     15568.86       532.42     14554.01 o
  11    0    6     14876.86       646.36     13879.20 o
  12    0    6       388.79       130.27       298.25 o
  13    0    6      6425.79       468.94      5955.21 o
 -15    1    6       323.28       144.78       545.69 o
 -14    1    6      5565.70       600.73      5159.55 o
 -13    1    6      3288.61       282.19      2533.11 o
 -12    1    6      5010.37       343.44      4529.29 o
 -11    1    6      1153.55       420.75      1486.87 o
 -10    1    6       172.79        79.61       168.22 o
  -9    1    6      1017.56       108.67      1013.79 o
  -8    1    6       613.86        91.23       480.49 o
  -7    1    6      1616.81       143.90      1716.44 o
  -6    1    6     10357.40       280.17     10987.23 o
  -5    1    6      2892.81       129.56      3051.46 o
  -4    1    6      6161.01       283.61      6051.28 o
  -3    1    6     19557.29       683.35     19212.73 o
  -2    1    6     33892.91      1007.28     34287.93 o
  -1    1    6     23259.52       687.50     24211.36 o
   0    1    6     17220.62       514.79     16998.94 o
   1    1    6     23973.41       740.59     24840.91 o
   2    1    6     34920.54      1086.75     35347.76 o
   3    1    6     19198.03       653.21     19044.00 o
   4    1    6      5604.28       306.55      5751.71 o
   5    1    6      2841.22       157.74      3079.14 o
   6    1    6      9784.21       302.94     10340.86 o
   7    1    6      1879.93       122.34      1822.44 o
   8    1    6       474.47        80.20       385.73 o
   9    1    6      1188.88       217.13      1161.45 o
  11    1    6      1439.32       138.38      1355.71 o
  12    1    6      4532.74       308.13      4316.49 o
  13    1    6      2716.06       310.25      2631.69 o
  14    1    6      5357.18       919.31      4911.21 o
 -14    2    6      1630.68       212.61      1454.66 o
 -13    2    6      2085.18       257.70      1790.14 o
 -12    2    6      2969.19       288.76      2800.53 o
 -11    2    6      3418.13       313.85      3237.61 o
 -10    2    6     13261.20       693.47     12474.66 o
  -9    2    6      1270.93        93.23      1241.86 o
  -8    2    6     14020.73       419.68     13628.23 o
  -7    2    6      4477.31       195.72      4165.41 o
  -6    2    6     13829.88       376.35     14170.52 o
  -5    2    6      1445.86        88.98      1585.63 o
  -4    2    6     11652.80       456.90     11787.44 o
  -3    2    6       349.78        65.64       446.90 o
  -2    2    6      1236.81        99.24      1207.56 o
  -1    2    6      3458.48       151.78      3442.17 o
   0    2    6      4236.57       181.42      4490.34 o
   1    2    6      3117.24       146.02      3084.69 o
   2    2    6       713.98        85.51       808.26 o
   3    2    6       674.99        76.89       778.97 o
   4    2    6     11207.67       415.30     11504.71 o
   5    2    6      1493.35       126.33      1597.60 o
   6    2    6     12304.29       431.33     12582.11 o
   7    2    6      4340.22       167.76      4239.31 o
   8    2    6     12080.12       805.59     12358.77 o
   9    2    6       830.56       113.06       862.01 o
  10    2    6     13059.88       475.83     12365.44 o
  11    2    6      3394.03       218.52      3139.36 o
  12    2    6      2987.97       220.08      2910.60 o
  13    2    6      1863.56       182.72      1824.14 o
 -15    3    6      3745.49       930.85      3533.11 o
 -14    3    6       530.77       244.18       617.52 o
 -13    3    6      4959.35       436.20      4447.56 o
 -12    3    6       755.95       162.73       611.57 o
 -11    3    6      2389.37       299.41      2199.61 o
 -10    3    6      7696.82       558.51      7306.83 o
  -9    3    6       422.04       125.13       318.62 o
  -8    3    6      1567.38       227.51      1465.36 o
  -7    3    6       629.30        55.25       763.97 o
  -6    3    6      5488.95       163.16      5774.48 o
  -5    3    6     14020.73       383.01     14407.20 o
  -4    3    6      3090.40       210.43      2727.97 o
  -3    3    6     36002.68      1123.04     36290.25 o
  -2    3    6      7888.19       244.50      8192.06 o
  -1    3    6     17456.24       541.03     17744.90 o
   0    3    6      8171.87       279.97      7684.28 o
   1    3    6     17542.73       524.14     17982.81 o
   2    3    6      7318.19       276.71      7624.78 o
   3    3    6     36711.30      1404.37     37310.79 o
   4    3    6      2593.73       191.02      2353.22 o
   5    3    6     13676.53       442.67     14044.62 o
   6    3    6      5440.62       233.51      5700.25 o
   7    3    6       543.53        67.39       683.30 o
   8    3    6      1490.69       127.55      1466.89 o
   9    3    6       337.66        69.56       284.93 o
  10    3    6      8899.75       409.03      8188.44 o
  11    3    6      2625.37       215.11      2576.58 o
  12    3    6       522.87       137.70       497.74 o
  13    3    6      4372.02       327.65      4175.74 o
  14    3    6       332.62       119.24       636.05 o
  15    3    6      3078.94      1166.65      3476.28 o
 -14    4    6       901.43       179.77       845.06 o
 -13    4    6      3146.13       478.67      2760.45 o
 -12    4    6      4258.99       404.23      3601.20 o
 -11    4    6      4588.51       384.61      4215.90 o
 -10    4    6      5984.03       492.46      5635.50 o
  -9    4    6      4218.67       422.43      3643.33 o
  -8    4    6      6061.48       439.37      5803.39 o
  -7    4    6      7136.81       436.06      7098.06 o
  -6    4    6     12789.94       614.88     13057.63 o
  -5    4    6     13277.06       372.72     14498.57 o
  -4    4    6     16874.67       661.58     17558.90 o
  -3    4    6      3348.07       169.25      3121.46 o
  -2    4    6      1636.24       109.96      1370.48 o
  -1    4    6      1868.02       142.78      1904.45 o
   0    4    6      7525.70       256.73      7579.44 o
   1    4    6      1643.21       124.15      1422.04 o
   2    4    6      1180.59       112.32      1058.20 o
   3    4    6      2920.63       171.09      2834.50 o
   4    4    6     14634.42       441.26     15682.55 o
   5    4    6     13664.46       386.16     14340.06 o
   6    4    6     12087.68       336.71     12432.25 o
   7    4    6      7131.00       232.47      7091.32 o
   8    4    6      6783.72       232.41      6691.24 o
   9    4    6      4324.37       224.03      3873.82 o
  10    4    6      6752.58       277.12      6387.21 o
  11    4    6      4518.85       249.83      4196.45 o
  12    4    6      4322.11       255.64      3888.77 o
  13    4    6      3046.56       231.72      2647.10 o
  14    4    6       590.22       230.74      1004.26 o
 -16    5    6      3310.35       829.57      3819.24 o
 -14    5    6      2431.61       315.62      2553.28 o
 -12    5    6      1902.38       345.21      1808.80 o
 -11    5    6      1403.00       210.10      1345.42 o
 -10    5    6      1187.69       222.95      1114.89 o
  -9    5    6      5197.20       424.21      4410.29 o
  -8    5    6      3088.49       323.19      2905.21 o
  -7    5    6      3764.47       287.14      3522.42 o
  -6    5    6      9872.91       444.49     10064.10 o
  -5    5    6       132.49        57.04        45.56 o
  -4    5    6     25422.58       674.86     25689.68 o
  -3    5    6      5930.91       161.66      5950.58 o
  -2    5    6     23438.30       521.55     24401.56 o
  -1    5    6      5555.44       171.84      5608.51 o
   0    5    6     40033.73       998.35     40236.35 o
   1    5    6      6423.03       206.84      6331.38 o
   2    5    6     21981.31       668.34     23295.92 o
   3    5    6      6026.70       219.06      6054.40 o
   4    5    6     25351.30       684.87     25106.40 o
   6    5    6     10462.73       288.63     10646.11 o
   7    5    6      3811.06       182.69      3676.00 o
   8    5    6      2883.56       134.89      2834.50 o
   9    5    6      3911.56       180.78      3762.60 o
  10    5    6      1408.16       135.59      1316.24 o
  11    5    6      1279.53       120.63      1349.83 o
  12    5    6      1762.47       145.91      1679.36 o
  13    5    6       314.67        88.51       347.82 o
  14    5    6      1955.27       381.93      2127.05 o
  16    5    6      3033.28       911.60      3645.74 o
 -14    6    6       852.52       304.44      1151.24 o
 -13    6    6      1162.92       252.30       951.11 o
 -12    6    6      1376.06       296.15      1176.49 o
 -11    6    6      7952.50       635.22      7864.14 o
 -10    6    6       720.43       172.72       837.52 o
  -9    6    6     12603.82       985.13     11401.97 o
  -8    6    6     10266.55       561.36     10213.12 o
  -7    6    6     12735.52       749.49     12735.12 o
  -6    6    6      2935.53       216.27      2816.42 o
  -5    6    6      9750.21       475.70      9647.17 o
  -4    6    6      2997.38       113.04      3379.10 o
  -3    6    6      7818.05       194.73      8177.58 o
  -2    6    6      3539.90       128.98      3495.17 o
  -1    6    6      1369.69        89.15      1396.52 o
   1    6    6      1798.77        90.49      1734.72 o
   2    6    6      3071.30       184.98      3127.05 o
   3    6    6      8057.18       324.33      8410.72 o
   4    6    6      3334.15       156.97      3609.61 o
   5    6    6      8460.56       202.57      8877.41 o
   6    6    6      3061.78       118.05      3220.56 o
   7    6    6     13063.81       346.11     12977.77 o
   8    6    6     10406.49       322.95     10455.06 o
   9    6    6     12266.15       434.47     11942.12 o
  10    6    6       985.98        95.09       789.05 o
  11    6    6      8041.74       351.79      7729.93 o
  12    6    6      1129.13       114.47      1162.13 o
  13    6    6       870.70       167.54      1202.01 o
  14    6    6       779.79       219.09      1239.04 o
 -15    7    6      3235.54       414.96      3559.32 o
 -14    7    6      1421.10       242.58      1314.79 o
 -13    7    6      5100.90       491.53      4514.50 o
 -11    7    6      4308.54       451.75      4474.27 o
 -10    7    6       511.13       168.82       657.41 o
  -8    7    6      3086.58       307.80      2882.62 o
  -7    7    6      3422.15       267.73      3197.90 o
  -6    7    6      7397.89       358.13      7225.00 o
  -5    7    6      1274.61       156.02      1299.60 o
  -4    7    6      1775.49        98.60      1930.72 o
  -3    7    6     13801.57       311.28     13848.58 o
  -2    7    6     14159.61       401.28     14563.66 o
  -1    7    6     12503.58       361.70     13257.22 o
   0    7    6      8489.07       228.28      9002.21 o
   1    7    6     11978.22       365.32     12882.25 o
   2    7    6     14147.33       442.04     14810.89 o
   3    7    6     13071.68       405.23     13735.84 o
   4    7    6      2158.09       113.50      2135.36 o
   5    7    6      1082.22        60.00      1231.31 o
   6    7    6      6450.64       190.70      6774.94 o
   7    7    6      3711.87       142.56      3622.84 o
   8    7    6      3229.67       158.40      3084.69 o
   9    7    6       267.73        56.31       269.62 o
  10    7    6       595.24        80.60       609.60 o
  11    7    6      4376.57       254.97      4558.95 o
  12    7    6       340.20        78.70       314.00 o
  13    7    6      4600.18       329.08      4632.16 o
  14    7    6       626.71       227.43      1096.93 o
  15    7    6      3054.16      1325.50      3460.97 o
 -15    8    6       812.80       204.06       615.04 o
 -14    8    6      1008.80       274.33      1195.78 o
 -13    8    6       561.32       163.06       465.26 o
 -12    8    6      6376.24       670.46      5964.47 o
 -11    8    6       937.95       216.05       933.30 o
 -10    8    6      8165.65       578.37      7396.00 o
  -8    8    6     22103.92      1012.98     20932.30 o
  -7    8    6      1524.09       167.93      1362.35 o
  -6    8    6      5920.32       357.44      5568.14 o
  -5    8    6      1273.38       138.76      1294.56 o
  -4    8    6     14365.09       408.31     14366.42 o
  -3    8    6      3018.14       115.32      3272.98 o
  -2    8    6      7863.76       219.71      7862.37 o
  -1    8    6      4658.71       166.76      4560.30 o
   1    8    6      4786.41       185.69      4761.00 o
   2    8    6      7872.92       225.94      8101.80 o
   3    8    6      2872.48       125.41      3188.86 o
   4    8    6     14431.15       380.31     15291.80 o
   5    8    6      1530.81       169.64      1410.00 o
   6    8    6      5281.89       152.55      5771.44 o
   7    8    6      1280.76        60.34      1413.76 o
   8    8    6     20300.51       509.90     21178.98 o
   9    8    6       328.24        43.64       329.06 o
  10    8    6      7096.17       281.18      7756.32 o
  11    8    6       809.86        94.99       928.42 o
  12    8    6      5387.45       444.53      6060.62 o
  15    8    6       674.09       234.97       648.72 o
 -14    9    6       691.18       200.84       630.01 o
 -13    9    6       535.53       199.08       729.00 o
 -12    9    6       842.50       213.75       595.85 o
 -10    9    6      1113.00       239.94      1296.00 o
  -8    9    6      1306.75       186.59      1221.50 o
  -7    9    6      2844.88       266.13      2773.08 o
  -6    9    6      3380.01       232.07      3193.38 o
  -5    9    6     10242.16       431.84      9733.80 o
  -4    9    6      3342.10       214.85      2963.71 o
  -3    9    6      5586.26       151.74      5728.98 o
  -2    9    6     10767.63       278.52     10922.34 o
  -1    9    6      6704.60       222.59      6776.58 o
   0    9    6      7903.48       299.80      8190.25 o
   1    9    6      6053.44       248.99      6344.12 o
   2    9    6     10476.81       331.09     10621.36 o
   3    9    6      6169.12       175.68      6502.81 o
   4    9    6      3080.85       223.47      2723.80 o
   5    9    6      9900.29       592.34      9598.12 o
   6    9    6      3412.09       299.50      3134.88 o
   7    9    6      2674.97       275.86      2745.76 o
   8    9    6      1428.90       162.60      1251.74 o
   9    9    6       233.96       100.53        84.46 o
  10    9    6       930.59       206.80      1042.64 o
  11    9    6       229.77        44.34       500.86 o
 -14   10    6       378.01       171.27       307.65 o
 -13   10    6      1921.94       318.31      2043.04 o
 -11   10    6      4800.70       619.91      4754.10 o
 -10   10    6       312.84       127.21       209.09 o
  -9   10    6      5989.36       476.70      6115.24 o
  -8   10    6      3954.72       417.65      3818.00 o
  -7   10    6     18089.29       772.91     17742.24 o
  -6   10    6      3521.50       236.88      3382.59 o
  -5   10    6     13079.55       625.74     12852.76 o
  -4   10    6       575.26        98.22       418.20 o
  -3   10    6      3151.92       137.17      3165.19 o
  -2   10    6      1388.86        85.92      1411.50 o
  -1   10    6      1692.39       117.50      1781.68 o
   0   10    6      2667.86       127.97      2729.02 o
   1   10    6      1964.41       117.44      1834.41 o
   2   10    6      1146.55        81.56      1260.96 o
   3   10    6      2944.86       250.23      2805.82 o
   4   10    6       256.59       105.28       373.65 o
   5   10    6     13150.48       615.60     12676.51 o
   6   10    6      3364.02       269.44      3518.86 o
   7   10    6     18335.42       936.57     17939.92 o
   8   10    6      3939.59       282.94      3669.94 o
   9   10    6      5933.56       405.56      5889.03 o
  13   10    6      1108.42       498.36      2105.89 o
 -11   11    6      1304.27       224.94       901.80 o
 -10   11    6       968.77       254.91      1106.89 o
  -9   11    6      1856.14       219.42      1510.10 o
  -8   11    6       624.13       146.15       755.15 o
  -7   11    6       949.58       152.70       834.63 o
  -6   11    6      5309.43       391.16      5089.40 o
  -5   11    6      1034.09       141.64      1025.28 o
  -4   11    6      4988.47       281.93      4998.49 o
  -3   11    6      6634.34       252.26      6717.44 o
  -2   11    6      6889.00       382.72      7631.77 o
  -1   11    6       884.98        89.06       966.59 o
   0   11    6     18719.49       645.01     18618.60 o
   1   11    6      1092.44       120.56      1040.06 o
   2   11    6      8140.79       248.38      8394.22 o
   3   11    6      6492.17       374.31      6527.02 o
   4   11    6      5473.67       361.52      5165.30 o
   5   11    6      1154.72       156.69      1008.06 o
   6   11    6      5231.99       350.96      4992.84 o
   7   11    6       711.22       159.68       725.22 o
   8   11    6       591.89       121.39       601.72 o
   9   11    6      1541.60       206.72      1514.77 o
  10   11    6       908.68       366.17      1193.70 o
  11   11    6       809.86       246.78       894.61 o
  12   11    6       574.44       230.93       834.05 o
 -13   12    6      1430.20       309.72      1268.78 o
 -12   12    6       718.58       321.01      1197.85 o
 -11   12    6      1709.42       382.72      1724.74 o
 -10   12    6      2714.27       546.80      2441.35 o
  -9   12    6      5222.04       457.55      4679.93 o
  -8   12    6      3720.26       304.34      3233.06 o
  -7   12    6      7397.89       568.27      7439.06 o
  -6   12    6      6914.72       409.19      6395.20 o
  -5   12    6      2229.00       199.83      2037.62 o
  -4   12    6      7552.59       373.82      6717.44 o
  -3   12    6      5251.92       331.67      5138.02 o
  -2   12    6      1270.93        96.91      1494.60 o
  -1   12    6      1766.80       118.61      1790.14 o
   0   12    6       104.80        47.91        90.82 o
   1   12    6      1662.79       113.66      1455.42 o
   2   12    6      1708.00       163.55      1486.10 o
   3   12    6      5417.80       341.94      5158.11 o
   4   12    6      7353.56       439.68      6658.56 o
   5   12    6      1833.97       247.57      1574.50 o
   6   12    6      6261.35       441.11      5885.96 o
   7   12    6      7409.73       533.18      7150.39 o
   8   12    6      3354.05       304.91      3305.10 o
   9   12    6      4454.31       445.55      4210.71 o
  10   12    6      1732.26       552.83      2256.25 o
  11   12    6      1121.06       342.19      1528.03 o
  12   12    6       547.54       243.98      1225.70 o
  13   12    6       393.55       172.03      1069.94 o
 -11   13    6      1488.03       311.94      1303.21 o
 -10   13    6       280.84       111.30       117.94 o
  -9   13    6       295.44       132.49       197.40 o
  -8   13    6       420.62       105.86       330.88 o
  -7   13    6      2196.62       217.73      2382.42 o
  -6   13    6      1512.02       196.70      1482.25 o
  -5   13    6      5359.70       466.06      4700.47 o
  -4   13    6       812.80       138.33       878.53 o
  -3   13    6      3802.57       290.71      3616.82 o
  -2   13    6       266.05        47.15       320.05 o
  -1   13    6     21087.55      1034.39     21438.82 o
   1   13    6     20541.46       626.35     20805.18 o
   2   13    6       546.74       100.58       449.86 o
   3   13    6      3624.34       345.96      3449.21 o
   4   13    6       714.90       160.09       823.69 o
   5   13    6      5488.95       379.87      4869.25 o
   6   13    6      1730.83       213.31      1806.25 o
   7   13    6      2240.38       263.86      2304.00 o
   8   13    6       234.49       105.39       313.29 o
   9   13    6       335.77       139.35       215.80 o
  11   13    6       782.68       248.38      1293.12 o
 -11   14    6      1209.13       313.50      1241.86 o
 -10   14    6      4838.92       552.95      3792.10 o
  -9   14    6      3866.50       509.26      4093.44 o
  -8   14    6      6436.83       640.51      6204.71 o
  -7   14    6      1794.39       266.75      1502.34 o
  -6   14    6      4422.22       503.44      3695.42 o
  -5   14    6      3647.17       320.04      3372.12 o
  -4   14    6      5545.18       427.93      5536.85 o
  -3   14    6      3836.60       257.90      3756.46 o
  -2   14    6      2126.23       199.93      1742.23 o
  -1   14    6       847.50        81.14       869.66 o
   1   14    6       918.04       157.44       913.85 o
   2   14    6      1937.06       258.98      1790.98 o
   3   14    6      4033.01       340.91      3763.82 o
   4   14    6      5820.13       425.29      5935.16 o
   5   14    6      3488.90       282.53      3370.96 o
   6   14    6      3834.47       332.41      3493.99 o
   7   14    6      1400.42       378.60      1450.85 o
   8   14    6      5578.54       506.32      5483.40 o
   9   14    6      4046.13       960.92      4113.94 o
  10   14    6      3362.03       740.24      4005.62 o
  11   14    6      1286.93       478.97      1293.84 o
  -7   15    6      1119.90       315.53      1209.65 o
  -6   15    6      2093.04       486.46      1877.49 o
  -5   15    6      1445.86       234.22      1343.22 o
  -4   15    6      2837.55       280.46      2445.30 o
  -3   15    6      1896.38       208.29      1580.06 o
  -2   15    6      7466.12       440.06      7136.87 o
  -1   15    6      1326.73       213.08      1460.77 o
   0   15    6      4553.62       341.35      4391.71 o
   1   15    6      1349.39       163.06      1427.33 o
   2   15    6      7561.57       430.89      7661.50 o
   3   15    6      1719.39       205.47      1708.17 o
   4   15    6      2306.01       272.66      2410.81 o
   5   15    6      1296.82       246.60      1225.00 o
   6   15    6      1715.12       240.84      1796.91 o
   7   15    6      1140.73       246.39      1253.87 o
  -9   16    6      7015.24       691.72      5593.54 o
  -8   16    6       502.61       155.06       533.61 o
  -7   16    6      7021.00       475.76      5686.67 o
  -6   16    6       549.96       146.06       559.32 o
  -5   16    6      4162.98       353.02      3783.48 o
  -3   16    6      1618.19       429.12      2168.76 o
  -2   16    6       344.65       110.52       319.34 o
  -1   16    6       764.49       193.14       981.57 o
   0   16    6       475.97       144.14       518.02 o
   1   16    6      1115.30       124.11      1079.78 o
   2   16    6       325.14       107.96       293.44 o
   3   16    6      2689.23       194.51      2568.46 o
   5   16    6      2991.73       899.68      3766.28 o
   7   16    6      4535.06       532.99      5307.12 o
   9   16    6      6710.23      1102.16      5635.50 o
  -5   17    6       877.82       262.02      1118.90 o
  -4   17    6      2553.58       452.11      2582.67 o
  -2   17    6      5354.66       455.77      4596.84 o
  -1   17    6      1713.69       403.14      1836.12 o
   0   17    6       280.84        82.46       386.52 o
   1   17    6      1927.98       223.62      2145.54 o
   2   17    6      5108.28       334.49      5097.96 o
   3   17    6      3052.26       239.54      3122.57 o
   4   17    6      1875.46       555.86      2895.52 o
   5   17    6       622.41       120.19       984.70 o
   6   17    6       935.85       272.65      1114.22 o
  -3   18    6       452.98       144.28       264.06 o
  -1   18    6      2091.47       771.12      2455.20 o
   0   18    6      1054.11       214.51      1126.27 o
   1   18    6      2047.64       356.58      2446.29 o
   4   18    6      2325.88       574.21      3433.96 o
   6   18    6      5017.68       489.95      4596.84 o
  -3   19    6      3969.89      1589.26      4604.98 o
  -1   19    6      8603.60       794.77      8003.09 o
   1   19    6      8495.42       843.67      7775.71 o
   4   19    6      1049.64       462.67      1282.36 o
   1    0    7     10540.31       381.55     11472.55 o
   2    0    7      2539.69       182.09      2585.72 o
   3    0    7      2279.65       205.37      1704.86 o
   4    0    7     18419.38       719.22     18025.75 o
   5    0    7      1365.87       161.51      1139.74 o
   6    0    7      5276.89       217.47      5610.01 o
   7    0    7      5127.97       234.10      5372.89 o
   8    0    7     13850.12       449.52     13439.76 o
   9    0    7       136.89        52.74         2.59 o
  10    0    7     18710.08       710.75     17226.56 o
  11    0    7      5509.37       280.96      5541.31 o
  12    0    7     11809.34       583.36     11412.65 o
  13    0    7      2279.65       303.95      1799.46 o
 -14    1    7      1179.40       284.81      1418.28 o
 -13    1    7       757.85       169.57       599.76 o
 -12    1    7      5202.16       409.52      4659.43 o
 -11    1    7      4310.80       264.34      4081.93 o
 -10    1    7      1528.12       186.98      1524.90 o
  -9    1    7      5306.93       225.61      5310.04 o
  -8    1    7      2038.30       118.07      1773.25 o
  -7    1    7      1309.24       105.84      1360.87 o
  -6    1    7      1938.57       159.09      1807.10 o
  -5    1    7     14373.34       602.33     13874.48 o
  -4    1    7       575.26       109.77       620.51 o
  -3    1    7      7627.54       327.58      7947.72 o
  -2    1    7     15108.60       507.57     15485.31 o
  -1    1    7     25029.07       860.16     25808.42 o
   0    1    7     40648.85      1304.32     39676.66 o
   1    1    7     25769.42       817.55     26448.52 o
   2    1    7     15036.78       523.24     15368.56 o
   3    1    7      7203.83       297.91      7558.56 o
   4    1    7       945.35       139.66       926.59 o
   5    1    7     13292.92       618.92     13085.07 o
   6    1    7      1923.45       129.79      1998.98 o
   7    1    7      1322.97        98.88      1233.41 o
   8    1    7      2113.56       128.14      1887.90 o
   9    1    7      5486.40       247.24      5397.84 o
  10    1    7      1847.25       149.38      1829.27 o
  11    1    7      4793.55       231.10      4490.34 o
  12    1    7      4901.36       284.28      4677.19 o
  13    1    7       658.11       124.47       535.00 o
 -13    2    7      1581.03       218.92      1357.92 o
 -12    2    7      4103.24       372.52      3272.98 o
 -11    2    7      5261.90       599.08      4767.90 o
 -10    2    7       642.31        75.00       562.64 o
  -9    2    7     11597.15       411.34     11136.58 o
  -8    2    7      2916.92       122.66      2857.97 o
  -7    2    7     16175.78       507.68     16289.42 o
  -6    2    7      1409.45       135.65      1637.82 o
  -5    2    7     11712.31       607.03     11646.73 o
  -4    2    7      8153.22       428.79      7700.06 o
  -3    2    7      3580.97       224.45      3595.20 o
  -2    2    7     12331.03       473.83     12345.43 o
  -1    2    7       650.19       116.70       745.29 o
   0    2    7      7075.90       283.67      6995.65 o
   1    2    7       556.44        85.23       555.54 o
   2    2    7     12008.36       471.36     12219.09 o
   3    2    7      3872.92       186.31      3847.72 o
   4    2    7      6986.45       451.57      7383.96 o
   5    2    7     12353.96       413.07     12986.88 o
   6    2    7      1626.51       136.01      1635.39 o
   7    2    7     14530.53       439.69     14438.43 o
   8    2    7      2854.07       189.35      2730.06 o
   9    2    7     11047.95       401.48     10526.76 o
  10    2    7       502.61       100.29       539.17 o
  11    2    7      4340.22       278.84      4042.42 o
  12    2    7      3003.03       230.06      2901.98 o
  13    2    7      1146.55       171.28      1241.86 o
  16    2    7       601.98       228.80       535.00 o
 -13    3    7      5051.86       435.36      4410.29 o
 -12    3    7      2572.74       308.94      2606.10 o
 -11    3    7       752.17       184.03       804.29 o
  -9    3    7       828.58       182.26       810.54 o
  -8    3    7       240.32        51.21       296.87 o
  -7    3    7      9069.36       272.00      9329.63 o
  -6    3    7      1431.50        85.93      1357.92 o
  -5    3    7     18536.33       829.25     17819.58 o
  -4    3    7     19803.49       963.66     19443.51 o
  -3    3    7      4107.65       194.08      3451.56 o
  -2    3    7     27441.86       820.86     28002.68 o
  -1    3    7      1251.38       111.99      1480.71 o
   0    3    7     24256.63       782.47     24205.14 o
   1    3    7      1186.50       113.79      1440.96 o
   2    3    7     26965.11       870.21     27536.08 o
   3    3    7      4009.01       237.49      3426.93 o
   4    3    7     18181.97       849.13     18447.07 o
   5    3    7     16079.64       571.62     16548.25 o
   6    3    7      1259.91       129.47      1092.96 o
   7    3    7      8281.11       284.96      8632.27 o
   8    3    7       455.92        67.60       388.88 o
   9    3    7       728.76        99.40       788.49 o
  10    3    7       179.65        57.19       174.50 o
  11    3    7       564.58       100.57       554.60 o
  12    3    7      2404.53       199.11      2884.76 o
  13    3    7      4039.57       319.32      3895.01 o
  14    3    7      1393.99       475.37      1845.56 o
  15    3    7       492.63       174.14       728.46 o
 -14    4    7      1286.93       249.36       933.91 o
 -13    4    7      1329.24       250.92       992.25 o
 -12    4    7      1279.53       235.10      1106.89 o
 -11    4    7      3010.58       368.18      2962.62 o
 -10    4    7      6174.52       602.99      5855.31 o
  -9    4    7      3813.19       320.86      3370.96 o
  -8    4    7      3663.81       249.95      3203.56 o
  -7    4    7     12148.29       557.54     11955.24 o
  -6    4    7      6972.07       235.61      7172.40 o
  -5    4    7      9207.52       495.29      9078.28 o
  -4    4    7     12774.38       575.62     12642.75 o
  -3    4    7     16193.29       486.06     16576.56 o
  -2    4    7      2634.19       180.15      2429.50 o
  -1    4    7      7197.99       280.27      6728.92 o
   0    4    7      3595.40       187.77      3548.58 o
   1    4    7      7504.82       292.14      7039.21 o
   2    4    7      3165.46       178.12      2965.89 o
   3    4    7     14709.45       642.72     15428.12 o
   4    4    7     13324.68       548.16     13264.13 o
   5    4    7      8438.42       347.72      8204.74 o
   6    4    7      7693.80       223.36      7754.56 o
   7    4    7     11981.98       433.17     11731.06 o
   8    4    7      3196.51       177.04      2955.01 o
   9    4    7      3879.35       210.04      3738.10 o
  10    4    7      6285.88       341.03      5843.07 o
  11    4    7      2852.23       220.53      2876.18 o
  12    4    7       983.82       164.06      1217.31 o
  13    4    7       906.60       208.26      1056.25 o
  14    4    7       930.59       353.76      1202.01 o
 -15    5    7      1801.69       620.77      2187.43 o
 -13    5    7      1800.23       313.91      1751.42 o
 -12    5    7      1143.05       219.89       980.94 o
 -11    5    7       868.67       317.45       811.68 o
 -10    5    7      1537.55       269.86      1533.51 o
  -9    5    7      1541.60       209.42      1361.61 o
  -8    5    7      2918.77       250.98      2588.77 o
  -7    5    7      2766.51       219.00      2652.25 o
  -6    5    7      7165.91       361.21      7050.96 o
  -5    5    7      4642.28       330.59      4606.34 o
  -4    5    7      4399.37       264.76      4378.47 o
  -3    5    7     26296.87       848.20     26657.09 o
  -2    5    7       487.30        69.89       363.28 o
  -1    5    7     18672.44       681.82     18936.51 o
   0    5    7       700.25        77.40       712.36 o
   1    5    7     18541.01       665.36     18804.64 o
   2    5    7       417.10        90.66       353.06 o
   3    5    7     26795.85       856.21     27416.74 o
   4    5    7      3802.57       241.90      4051.32 o
   5    5    7      5973.39       265.96      5794.25 o
   6    5    7      6171.82       197.35      6561.00 o
   7    5    7      2957.95       125.39      2821.73 o
   8    5    7      2804.65       173.13      2893.36 o
   9    5    7      1114.15        98.78      1327.87 o
  10    5    7      1775.49       126.15      1748.08 o
  11    5    7      1004.43       112.33       935.75 o
  12    5    7      1129.13       131.82      1105.56 o
  13    5    7      1604.38       162.64      1833.55 o
  15    5    7      1513.36       457.82      2243.92 o
 -14    6    7      1046.30       222.62      1011.24 o
 -13    6    7      2524.10       437.40      2276.24 o
 -12    6    7      2959.82       475.52      2692.57 o
 -11    6    7      6291.34       573.18      5862.96 o
 -10    6    7      7427.51       602.03      6776.58 o
  -9    6    7      1758.14       238.07      1808.80 o
  -8    6    7     16838.93       857.35     15928.96 o
  -7    6    7      3263.00       249.64      3138.24 o
  -6    6    7      4279.23       297.14      4097.28 o
  -5    6    7      2532.75       214.74      2551.26 o
  -4    6    7      9746.81       302.36      9656.99 o
  -3    6    7       623.27        71.30       584.67 o
  -2    6    7      3420.14       142.88      3416.40 o
  -1    6    7     15483.11       453.87     16096.00 o
   0    6    7       382.70        78.09       341.88 o
   1    6    7     15261.25       480.37     15984.54 o
   2    6    7      3144.20       173.66      3211.49 o
   3    6    7       828.58        94.10       753.50 o
   4    6    7      9320.13       358.79      9451.73 o
   5    6    7      2339.18       164.77      2264.81 o
   6    6    7      4616.53       151.97      4534.68 o
   7    6    7      3533.76       141.15      3677.21 o
   8    6    7     15384.78       478.04     15398.33 o
   9    6    7      1991.96       116.72      2000.77 o
  10    6    7      5965.41       241.86      5748.67 o
  11    6    7      6217.86       293.05      6293.25 o
  12    6    7      2344.17       176.60      2584.71 o
  13    6    7      1798.77       166.38      2169.70 o
 -14    7    7      3069.40       379.39      2823.86 o
 -13    7    7       582.72       171.12       404.81 o
 -12    7    7      2452.01       293.08      2123.37 o
 -11    7    7      2217.64       372.71      2333.86 o
 -10    7    7      2524.10       321.56      2433.45 o
  -9    7    7      8020.16       591.69      7825.17 o
  -8    7    7       948.52       160.03       855.56 o
  -7    7    7       650.19       123.72       507.60 o
  -6    7    7       683.06       127.71       766.74 o
  -5    7    7       258.25        94.56       161.29 o
  -4    7    7      2980.45       103.32      3141.60 o
  -3    7    7      8432.10       233.83      8665.75 o
  -2    7    7     16714.13       440.43     17132.19 o
  -1    7    7      4906.18       204.88      4914.01 o
   0    7    7     19987.93       525.42     20741.76 o
   1    7    7      5286.89       207.67      5434.64 o
   2    7    7     16995.58       524.87     17939.92 o
   3    7    7      8511.28       346.04      8781.56 o
   4    7    7      2701.74       134.15      2871.89 o
   5    7    7       360.16        55.51       354.95 o
   6    7    7       968.77        62.12      1090.98 o
   7    7    7       240.32        45.88       324.00 o
   8    7    7       895.24        73.10       753.50 o
   9    7    7      7952.50       309.94      8087.40 o
  10    7    7      2409.60       175.67      2505.00 o
  11    7    7      1978.16       146.93      2019.60 o
  12    7    7      1654.38       286.93      2096.72 o
 -14    8    7       559.69       212.48       707.56 o
 -13    8    7      3124.93       717.51      3197.90 o
 -11    8    7      9740.01       801.48      8858.57 o
 -10    8    7       579.40       207.90       662.03 o
  -9    8    7      6837.68       432.51      5896.70 o
  -8    8    7      1676.85       270.55      1577.68 o
  -7    8    7     10023.93       485.78      9635.39 o
  -6    8    7       549.96        96.03       546.16 o
  -5    8    7     11925.55       496.04     11733.22 o
  -3    8    7      4481.92       163.57      4867.85 o
  -2    8    7      2115.14       126.61      2304.00 o
  -1    8    7      1374.79        84.21      1360.87 o
   0    8    7      6045.41       238.12      6379.22 o
   1    8    7      1453.72        95.78      1482.25 o
   2    8    7      2565.77       142.93      2848.36 o
   3    8    7      5167.47       205.31      5507.12 o
   5    8    7     10106.79       269.84     10930.70 o
   6    8    7       332.62        44.56       430.15 o
   7    8    7      8906.24       266.29      9718.02 o
   8    8    7      1521.40       100.67      1646.74 o
   9    8    7      6340.57       213.73      6258.39 o
  10    8    7       552.39        64.70       587.58 o
  11    8    7      8498.59       421.92      9181.47 o
  12    8    7       285.47        87.79       403.61 o
 -14    9    7      1084.49       313.90      1102.90 o
 -13    9    7      3225.76       422.15      2658.43 o
 -11    9    7       933.74       187.17       742.56 o
 -10    9    7      2445.20       296.08      2117.84 o
  -9    9    7       656.34       157.80       722.00 o
  -8    9    7       602.82       146.16       466.99 o
  -7    9    7      6307.73       401.75      5902.85 o
  -6    9    7      4486.53       329.60      4505.09 o
  -5    9    7     13785.40       638.36     13248.01 o
  -4    9    7      3558.35       162.16      3383.75 o
  -3    9    7      7654.61       258.92      7834.02 o
  -2    9    7      5125.51       184.77      5259.15 o
  -1    9    7      9503.74       311.98      9254.44 o
   0    9    7      7946.36       358.90      7917.44 o
   1    9    7      8476.40       291.47      8634.13 o
   2    9    7      5304.42       218.04      5415.49 o
   3    9    7      7391.97       248.52      7880.11 o
   4    9    7      3462.53       238.93      3436.30 o
   5    9    7     12650.23       592.16     12443.40 o
   6    9    7      4793.55       331.16      4576.52 o
   7    9    7      6606.34       385.98      6137.16 o
   8    9    7       593.56       163.48       584.19 o
   9    9    7       410.80        74.63       710.76 o
  10    9    7      1415.92       233.07      1702.39 o
 -14   10    7      1091.30       366.04      1178.55 o
 -13   10    7      1035.20       303.36      1057.55 o
 -12   10    7      2188.57       370.26      2173.42 o
 -11   10    7       780.75       177.88       704.90 o
 -10   10    7      5718.20       543.85      5295.47 o
  -9   10    7      1012.08       186.10       847.97 o
  -8   10    7      9962.01       604.49      9296.82 o
  -7   10    7       937.95       179.16       864.36 o
  -6   10    7     16982.12       775.79     16134.08 o
  -5   10    7      6288.61       360.21      5514.55 o
  -4   10    7      3025.71       151.43      3235.33 o
  -3   10    7      3952.56       140.62      3915.00 o
  -2   10    7      1147.71        92.10      1273.06 o
   1   10    7       245.68        60.95       220.52 o
   2   10    7       863.61        68.77       949.26 o
   3   10    7      3699.31       144.41      3671.15 o
   4   10    7      3342.10       276.52      3019.50 o
   5   10    7      6387.23       426.27      5962.93 o
   6   10    7     15944.65       890.76     15815.58 o
   7   10    7      1096.99       155.00      1116.23 o
   8   10    7      9774.01       619.17      9194.89 o
   9   10    7       928.49       211.81       929.03 o
  10   10    7      5463.49       409.51      5182.56 o
  13   10    7       613.86       254.92      1136.36 o
 -13   11    7      2222.50       358.52      2119.68 o
  -8   11    7      1542.95       268.99      1531.94 o
  -7   11    7       656.34       172.79       729.54 o
  -6   11    7      7096.17       391.33      6799.65 o
  -5   11    7      8435.26       461.43      8201.11 o
  -4   11    7      4118.69       340.10      3890.02 o
  -3   11    7      8789.72       341.97      8517.44 o
  -2   11    7       430.56        75.69       495.51 o
  -1   11    7      7687.77       313.79      7596.87 o
   0   11    7      1238.02       124.71      1250.33 o
   1   11    7      7766.41       312.35      7542.92 o
   2   11    7       604.51        75.30       529.00 o
   3   11    7      8945.26       354.75      9735.77 o
   4   11    7      4546.65       350.37      4440.89 o
   5   11    7      8331.29       533.96      7770.42 o
   6   11    7      6673.64       550.98      6478.64 o
   7   11    7       913.87       153.96       954.81 o
   8   11    7      1552.43       267.10      1399.51 o
  10   11    7       301.39       110.52       277.89 o
  11   11    7       235.02       104.45        88.92 o
  13   11    7      1029.67       405.24      2098.56 o
 -11   12    7      2369.23       289.77      2366.82 o
 -10   12    7      2839.38       352.06      2281.02 o
  -9   12    7      2522.37       321.45      2331.92 o
  -8   12    7      4628.23       372.22      4544.11 o
  -7   12    7      5666.27       409.27      5143.76 o
  -6   12    7      4491.14       350.53      4285.01 o
  -5   12    7      1494.68       203.55      1365.30 o
  -4   12    7      7073.00       422.53      6509.26 o
  -3   12    7      2212.78       163.49      2330.96 o
  -2   12    7      2322.56       233.83      3175.32 o
  -1   12    7      3027.60       208.28      2957.18 o
   1   12    7      2894.66       183.29      3051.46 o
   2   12    7      3204.30       157.78      3597.60 o
   3   12    7      2350.84       253.60      2259.10 o
   4   12    7      7221.37       476.65      6705.97 o
   5   12    7      1735.13       206.41      1642.68 o
   6   12    7      4342.49       371.89      4153.80 o
   7   12    7      5306.93       398.58      5254.80 o
   8   12    7      4399.37       524.96      4323.06 o
   9   12    7      2170.89       766.39      2734.24 o
  10   12    7      1949.19       556.04      2372.66 o
  11   12    7      1970.52       653.78      2557.32 o
 -12   13    7      1150.04       318.58       760.66 o
 -11   13    7      2053.87       327.50      1732.22 o
 -10   13    7       909.71       175.40       760.10 o
  -9   13    7      3067.49       398.33      2911.68 o
  -7   13    7      1400.42       222.78      1483.02 o
  -6   13    7      2613.04       269.13      2506.00 o
  -5   13    7       216.91        84.13       204.49 o
  -4   13    7      7630.55       514.01      7082.91 o
  -3   13    7      3730.77       287.95      3651.78 o
  -2   13    7     10360.90       504.38      9952.06 o
  -1   13    7       798.16       158.46       890.43 o
   0   13    7      7931.03       330.97      7798.66 o
   1   13    7       735.28       102.64       846.23 o
   2   13    7      9594.53       734.80      9267.91 o
   3   13    7      3444.33       300.91      3331.60 o
   4   13    7      7555.58       484.56      7131.80 o
   6   13    7      2258.34       315.61      2379.49 o
   7   13    7      1123.36       190.30      1276.63 o
   8   13    7       312.84       133.29       221.71 o
   9   13    7      2848.56       312.22      2950.66 o
  10   13    7       533.15       178.77       654.85 o
  11   13    7      1295.58       491.73      1581.65 o
  12   13    7       547.54       228.68       583.71 o
 -11   14    7      3515.38       516.19      2779.40 o
 -10   14    7      2737.63       509.54      2289.62 o
  -9   14    7      4101.04       685.34      4006.89 o
  -8   14    7      3374.01       437.74      3562.90 o
  -7   14    7      5463.49       419.68      5364.10 o
  -6   14    7      2211.16       276.70      2012.42 o
  -5   14    7      1374.79       247.53      1386.07 o
  -4   14    7      1362.06       193.04      1442.48 o
  -3   14    7      4663.41       333.69      4693.62 o
  -2   14    7      1521.40       158.38      1412.26 o
  -1   14    7       800.10        88.58       842.74 o
   0   14    7      7294.66       379.13      7701.82 o
   1   14    7       748.40        79.08       724.15 o
   2   14    7      1795.85       207.07      1691.68 o
   3   14    7      4865.29       350.44      4971.66 o
   4   14    7      1359.52       205.55      1446.28 o
   5   14    7      1293.11       197.99      1399.51 o
   6   14    7      2047.64       347.24      2044.85 o
   7   14    7      5450.78       467.46      5264.95 o
   8   14    7      3821.69       438.22      3793.33 o
   9   14    7      3898.66       354.52      4014.49 o
  10   14    7      2099.34       394.17      2401.98 o
 -10   15    7      1848.73       409.84      1576.88 o
  -8   15    7      1920.43       363.43      1610.42 o
  -7   15    7      1629.29       268.08      1416.77 o
  -6   15    7       589.38       179.61       548.03 o
  -5   15    7      2219.26       272.34      2222.18 o
  -4   15    7       816.73       157.35       756.25 o
  -3   15    7      1353.18       168.36      1272.35 o
  -2   15    7      1968.99       241.26      1874.02 o
  -1   15    7      6937.64       312.42      6428.83 o
   0   15    7      1392.71       115.58      1698.26 o
   1   15    7      5933.56       739.54      6686.33 o
   2   15    7      2269.80       259.03      2177.16 o
   3   15    7      1348.12       198.37      1303.21 o
   4   15    7       774.99       181.06       819.10 o
   5   15    7      1706.58       506.07      1899.22 o
   7   15    7      1409.45       229.96      1452.37 o
   8   15    7      1406.87       269.76      1418.28 o
  10   15    7      1722.25       408.43      1643.49 o
  -9   16    7       958.08       344.04       884.47 o
  -8   16    7      5653.33       905.57      4937.87 o
  -6   16    7      4090.03       385.13      3307.40 o
  -5   16    7      1171.15       529.93      1332.25 o
  -4   16    7      2725.04       567.64      3226.24 o
  -3   16    7      4290.49       340.35      4169.28 o
  -2   16    7       958.08       167.23      1100.25 o
  -1   16    7      1685.32       176.58      1988.27 o
   0   16    7      1854.65       217.85      2333.86 o
   1   16    7      1719.39       181.21      1976.69 o
   2   16    7       943.23       131.05      1056.90 o
   3   16    7      4205.27       392.74      4030.98 o
   4   16    7      2506.84       777.04      3357.04 o
   5   16    7       890.10       280.27      1279.49 o
   6   16    7      2515.47       469.44      3234.20 o
   8   16    7      5478.76       896.57      4911.21 o
   9   16    7       928.49       424.66       866.12 o
  -6   17    7      2470.79       523.41      2228.78 o
  -5   17    7      2532.75       924.78      2887.99 o
  -4   17    7      1077.70       381.83      1453.13 o
  -3   17    7      1190.06       305.08      1563.41 o
  -1   17    7      1404.29       229.54      1323.50 o
   0   17    7      2730.43       417.16      3004.14 o
   1   17    7      1223.53       172.13      1261.67 o
   2   17    7      1993.50       230.46      2266.71 o
   3   17    7      1400.42       298.76      1643.49 o
   4   17    7      1077.70       169.45      1217.31 o
   5   17    7      2557.06       567.27      3204.69 o
   6   17    7      1288.16       270.48      2155.74 o
  -5   18    7      2379.29       555.59      2551.26 o
  -4   18    7      2743.03       836.25      2449.26 o
  -2   18    7      1005.52       467.03      1357.92 o
   1   18    7       322.66       147.11       208.51 o
   2   18    7       890.10       263.85      1340.29 o
   3   18    7       544.33       135.68       548.96 o
   4   18    7      1879.93       337.19      2645.04 o
   5   18    7      1654.38       758.61      2559.35 o
   0   19    7      6980.70       635.39      6510.88 o
   2   19    7      2644.80       378.71      3037.11 o
   0    0    8     66918.81      3302.54     67688.43 o
   1    0    8      2414.67       174.17      2007.94 o
   2    0    8     28454.30      1004.20     27785.56 o
   3    0    8      2717.86       182.98      2764.66 o
   4    0    8      4116.48       273.77      3958.93 o
   5    0    8       969.84       142.53       893.41 o
   6    0    8      2863.27       165.72      2639.90 o
   7    0    8      1144.22        95.45      1098.26 o
   8    0    8      4670.46       216.36      4295.49 o
   9    0    8      3173.21       188.03      2739.48 o
  10    0    8       846.50       127.15      1032.98 o
  11    0    8      1700.89       151.85      1543.70 o
  12    0    8      7672.69       391.85      6727.28 o
 -13    1    8      2997.38       284.48      2711.28 o
 -12    1    8      1079.96       185.46       854.98 o
 -11    1    8      5606.85       288.59      5400.78 o
 -10    1    8     14086.00       571.77     13509.41 o
  -9    1    8      8281.11       363.25      8222.86 o
  -8    1    8      7609.52       327.19      7768.66 o
  -7    1    8     12000.82       441.05     12062.63 o
  -6    1    8      1041.85       106.63       973.44 o
  -5    1    8      6900.42       457.36      6598.31 o
  -4    1    8      2296.10       206.11      2164.11 o
  -3    1    8      2957.95       187.15      3036.01 o
  -2    1    8     14914.66       554.73     14165.76 o
  -1    1    8      9030.08       385.86      9011.70 o
   0    1    8       345.93        88.32       460.96 o
   1    1    8      9353.38       389.38      9434.24 o
   2    1    8     14468.38       546.37     14001.99 o
   3    1    8      3525.59       226.80      3478.64 o
   4    1    8      2345.84       256.67      2291.54 o
   5    1    8      7400.85       393.72      6656.93 o
   6    1    8      1280.76       147.78      1117.56 o
   7    1    8     11586.03       437.07     11783.10 o
   8    1    8      6906.14       283.11      7317.09 o
   9    1    8      8035.57       431.85      8197.49 o
  10    1    8     12665.71       530.56     12467.96 o
  11    1    8      5875.39       295.42      5378.76 o
  12    1    8      1018.66       170.23       999.19 o
  13    1    8      2748.44       292.25      2597.94 o
  14    1    8       516.59       136.09       586.12 o
 -13    2    8      3952.56       949.74      4324.38 o
 -12    2    8       326.38       149.82       431.39 o
 -11    2    8      1264.80       175.00      1028.48 o
 -10    2    8      1242.87        98.26      1166.22 o
  -9    2    8       793.30        79.48       661.52 o
  -8    2    8      5663.68       246.02      5751.71 o
  -7    2    8      2477.64       137.03      2725.88 o
  -6    2    8       692.08        74.23       642.62 o
  -5    2    8      4995.77       338.08      4787.26 o
  -4    2    8     11430.99       452.53     11666.16 o
  -3    2    8     19307.85       640.73     18534.10 o
  -2    2    8      6456.17       326.26      6294.84 o
  -1    2    8     38655.01      1420.77     36994.68 o
   0    2    8      2204.69       176.12      1974.02 o
   1    2    8     38885.38      1350.35     37701.99 o
   2    2    8      7209.67       324.33      7111.55 o
   3    2    8     17698.03       682.10     17318.56 o
   4    2    8     10943.30       557.96     11257.21 o
   5    2    8      5071.45       303.87      5058.05 o
   6    2    8       975.20       121.43       739.30 o
   7    2    8      3018.14       151.24      3051.46 o
   8    2    8      5147.70       313.55      4995.66 o
   9    2    8       583.55       104.74       624.00 o
  10    2    8      1165.26       138.61      1137.71 o
  11    2    8       969.84       140.39       935.75 o
  12    2    8       521.29       100.57       513.02 o
  13    2    8      5027.44       317.19      4552.20 o
  16    2    8       565.40       259.38       860.84 o
 -12    3    8      8603.60       644.75      7291.45 o
 -11    3    8       524.44       146.58       672.88 o
 -10    3    8      8831.71       523.89      7763.37 o
  -9    3    8       596.08       125.18       461.39 o
  -8    3    8      7684.75       241.33      7523.83 o
  -7    3    8       458.12        65.55       520.75 o
  -6    3    8     24958.35       820.89     25233.32 o
  -5    3    8       613.86       148.35       527.62 o
  -4    3    8      3791.97       233.09      3932.54 o
  -3    3    8      4959.35       264.14      4975.89 o
  -1    3    8      5627.48       276.21      5735.03 o
   1    3    8      5791.29       395.43      5738.06 o
   2    3    8       192.31        59.17       135.96 o
   3    3    8      4812.63       365.24      4773.43 o
   4    3    8      4250.02       253.50      4370.53 o
   5    3    8       408.02       102.87       435.97 o
   6    3    8     25924.32       880.95     25689.68 o
   7    3    8       368.04        69.98       467.86 o
   8    3    8      8007.83       397.24      7370.22 o
   9    3    8       378.67        81.69       336.72 o
  10    3    8      7418.62       340.85      7106.49 o
  11    3    8       648.43        99.89       619.01 o
  12    3    8      7421.58       423.92      6875.73 o
  13    3    8       175.52        80.24       237.16 o
  15    3    8       263.25       112.22       544.76 o
 -13    4    8       799.13       176.07       688.01 o
 -11    4    8       760.69       199.31       617.03 o
 -10    4    8      1890.39       240.88      1773.25 o
  -9    4    8       386.75       125.87       375.58 o
  -7    4    8       686.66       127.14       612.56 o
  -6    4    8      3132.63       154.08      3269.55 o
  -5    4    8      7808.93       656.83      6963.90 o
  -4    4    8     16040.39       557.85     16207.84 o
  -3    4    8     10452.17       439.76     10496.00 o
  -2    4    8     13664.46       563.15     14025.66 o
  -1    4    8     10997.37       541.30     11470.41 o
   0    4    8      5415.27       273.49      5230.18 o
   1    4    8     12350.14       432.13     12523.85 o
   2    4    8     14393.97       639.92     14720.97 o
   3    4    8     11258.73       478.32     11453.28 o
   4    4    8     16346.92       761.14     16126.46 o
   5    4    8      7064.32       318.15      7342.78 o
   6    4    8      3928.80       204.91      3890.02 o
   7    4    8       824.62        89.92       883.87 o
   8    4    8       261.02        58.93       262.12 o
   9    4    8       262.69        73.62       257.28 o
  10    4    8      2011.98       171.33      2038.52 o
  11    4    8       875.79       122.20       858.49 o
  13    4    8       528.39       196.17       652.29 o
  15    4    8       829.57       267.60      1361.61 o
 -13    5    8      4762.63       420.34      4139.64 o
 -12    5    8       957.02       223.55       720.92 o
 -11    5    8      2574.49       312.54      2593.86 o
 -10    5    8      4651.67       420.11      4279.78 o
  -9    5    8     12883.51       699.15     11835.26 o
  -8    5    8       706.64       148.19       675.48 o
  -7    5    8      9075.91       511.41      8617.41 o
  -6    5    8      1561.94       172.72      1440.96 o
  -5    5    8     13032.36       663.89     13064.49 o
  -4    5    8      3836.60       200.36      3540.25 o
  -3    5    8      4542.01       248.15      4628.08 o
  -2    5    8     12243.30       418.83     12479.12 o
  -1    5    8      1832.49       134.05      1765.68 o
   0    5    8      3772.92       215.60      3773.64 o
   1    5    8      1544.31       143.34      1553.15 o
   2    5    8     11306.24       428.10     11789.62 o
   3    5    8      4203.04       330.17      4370.53 o
   4    5    8      3454.44       248.77      3367.48 o
   5    5    8     13257.24       495.26     13384.18 o
   6    5    8      1476.11       132.21      1374.18 o
   7    5    8      8838.18       307.33      8643.42 o
   8    5    8       627.57        92.24       604.18 o
   9    5    8     13931.23       475.21     12782.56 o
  10    5    8      4238.81       230.76      4167.99 o
  11    5    8      2360.86       165.53      2326.13 o
  12    5    8       693.89       122.37       723.61 o
  13    5    8      3613.99       707.49      4070.44 o
  14    5    8       294.85       111.68       249.32 o
  15    5    8       218.95        96.23       385.73 o
 -14    6    8      3320.26      1215.48      3252.42 o
 -12    6    8      4410.79       459.36      3596.40 o
 -11    6    8       922.21       192.28       797.50 o
 -10    6    8      4068.05       340.19      3925.02 o
  -9    6    8      2441.80       343.48      2182.76 o
  -8    6    8      2546.63       276.11      2732.15 o
  -7    6    8      3998.12       302.44      3646.95 o
  -6    6    8       964.49       130.38       990.99 o
  -5    6    8      2520.65       150.31      2757.30 o
  -4    6    8      1382.45        83.16      1390.54 o
  -3    6    8     10839.16       347.51     10504.20 o
  -2    6    8     10207.36       330.28     10951.62 o
  -1    6    8      2584.97       148.71      2912.76 o
   0    6    8     40787.73      1216.20     41371.56 o
   1    6    8      3016.25       158.75      3249.00 o
   2    6    8     10867.84       430.48     11798.30 o
   3    6    8     10857.08       401.58     10613.12 o
   4    6    8      1967.47       180.11      1936.88 o
   5    6    8      2892.81       173.98      2880.47 o
   6    6    8       631.03        70.88       746.93 o
   7    6    8      3697.21       217.61      3900.00 o
   8    6    8      2703.52       171.77      3020.60 o
   9    6    8      2281.29       157.78      2179.02 o
  10    6    8      3645.09       218.14      3656.62 o
  11    6    8       753.12       100.10       809.40 o
  12    6    8      3245.34       701.80      3831.61 o
  14    6    8      2261.61       654.59      3269.55 o
 -13    7    8       689.37       173.47       561.69 o
 -12    7    8      2406.22       298.77      2041.23 o
 -11    7    8      2077.33       254.08      1560.25 o
 -10    7    8     12650.23       770.20     11365.69 o
  -9    7    8      4862.89       467.93      4628.08 o
  -8    7    8     19121.82       965.96     18071.42 o
  -7    7    8      2320.91       237.06      2234.45 o
  -6    7    8      3499.07       299.22      3337.37 o
  -5    7    8      1551.08       104.35      1785.06 o
  -4    7    8      2739.43       104.46      2845.16 o
  -3    7    8      3787.73       169.43      3758.92 o
  -2    7    8     11686.26       379.44     12456.79 o
  -1    7    8      2909.49       159.63      3086.91 o
   0    7    8       181.96        55.70       221.12 o
   1    7    8      3544.00       188.47      3463.32 o
   2    7    8     12642.49       533.94     13497.79 o
   3    7    8      4006.83       202.57      4239.31 o
   4    7    8      3548.10       196.77      3380.26 o
   5    7    8      1639.02       125.38      1626.51 o
   6    7    8      3202.35       161.63      3268.41 o
   7    7    8      2211.16       126.21      2156.67 o
   8    7    8     18475.47       645.47     18144.09 o
   9    7    8      4211.96       201.00      4175.74 o
  10    7    8     11611.98       463.51     11674.80 o
  11    7    8      1247.73       235.81      1220.10 o
  12    7    8      1692.39       182.62      1780.84 o
  13    7    8       366.06        93.49       550.37 o
 -13    8    8      2170.89       278.98      2149.25 o
 -12    8    8      2598.99       354.37      2362.93 o
 -11    8    8      1661.39       248.26      1634.58 o
 -10    8    8      1563.30       235.38      1360.13 o
  -8    8    8      2505.12       263.52      2357.10 o
  -7    8    8       995.73       171.56       704.37 o
  -6    8    8       684.86       135.08       642.12 o
  -5    8    8     10092.95       518.56     10330.69 o
  -4    8    8      6261.35       196.05      6624.33 o
  -3    8    8      4074.64       166.94      4015.76 o
  -2    8    8      1806.07       112.61      1716.44 o
  -1    8    8     18052.28       550.19     18249.31 o
   0    8    8      8584.46       302.89      8667.61 o
   1    8    8     17229.65       636.88     17755.56 o
   2    8    8      1700.89       123.47      1690.85 o
   3    8    8      3716.07       186.69      4030.98 o
   4    8    8      6506.04       249.81      7079.54 o
   5    8    8      9733.22       397.21      9850.56 o
   6    8    8       478.98        54.22       392.44 o
   7    8    8       709.39        57.74       741.47 o
   8    8    8      2848.56       130.40      2754.15 o
   9    8    8       167.41        60.11       197.68 o
  10    8    8      1259.91       144.13      1401.75 o
  11    8    8      1103.84       254.95      1716.44 o
 -14    9    8      2894.66       392.50      2310.72 o
 -13    9    8       629.30       262.42       646.68 o
 -12    9    8      4973.90       448.97      4568.41 o
 -11    9    8      5369.78       547.19      4866.46 o
 -10    9    8      1368.42       225.31      1116.90 o
  -9    9    8      4973.90       417.42      4902.80 o
  -8    9    8      7522.72       507.38      6829.37 o
  -7    9    8      2001.19       229.37      1679.36 o
  -6    9    8     17588.33       743.88     16594.59 o
  -5    9    8      4819.79       329.68      4604.98 o
  -4    9    8      5118.12       196.95      5473.04 o
  -3    9    8      3308.37       166.26      3485.72 o
  -2    9    8      1923.45       108.66      1885.30 o
  -1    9    8      2064.80       189.20      1950.11 o
   0    9    8      1345.60       116.13      1293.84 o
   1    9    8      2524.10       172.88      2469.10 o
   2    9    8      2022.80       120.72      1993.62 o
   3    9    8      3616.06       188.30      3785.94 o
   4    9    8      5165.00       262.15      5409.60 o
   5    9    8      4129.74       338.34      4164.12 o
   6    9    8     14981.97       614.95     16080.78 o
   7    9    8      1414.63        68.60      1855.89 o
   8    9    8      6954.84       456.29      6546.43 o
   9    9    8      4860.49       379.05      4867.85 o
  10    9    8       400.41        79.19       980.94 o
  12    9    8      3334.15      1434.60      4721.06 o
 -13   10    8       811.82       244.14       713.42 o
 -11   10    8       916.99       200.07       872.61 o
  -9   10    8      1652.98       242.04      1582.45 o
  -8   10    8       810.84       199.89       823.12 o
  -7   10    8      2522.37       233.31      2283.88 o
  -6   10    8      2723.24       260.38      2593.86 o
  -5   10    8       469.98       121.60       524.41 o
  -4   10    8     14864.27       658.68     15281.90 o
  -3   10    8      2198.24       188.77      2369.74 o
  -2   10    8     13107.11       437.30     13227.30 o
   0   10    8      6863.31       344.95      6527.02 o
   2   10    8     13644.35       518.52     13869.77 o
   3   10    8      2379.29       137.64      2511.01 o
   4   10    8     14028.88       440.19     14522.66 o
   5   10    8       864.62       133.56       702.78 o
   6   10    8      2479.35       275.86      2603.04 o
   7   10    8      1937.06       296.84      2211.82 o
   8   10    8       873.75       176.99       830.02 o
   9   10    8      1372.24       230.72      1489.19 o
 -13   11    8      3132.63       498.83      2731.11 o
 -12   11    8       792.33       185.01       837.52 o
 -11   11    8      3436.26       407.47      3204.69 o
  -9   11    8      2957.95       325.65      2880.47 o
  -8   11    8       755.01       169.25       564.06 o
  -7   11    8      7894.30       626.77      7623.04 o
  -6   11    8      4076.84       325.18      4218.50 o
  -5   11    8      9250.49       489.83      8550.70 o
  -4   11    8       683.06        96.23       550.84 o
  -3   11    8      1096.99        85.48      1124.26 o
  -2   11    8      2219.26       131.31      2392.19 o
   0   11    8      1521.40       124.83      1578.47 o
   2   11    8      1973.58       148.29      1970.47 o
   3   11    8       932.69        83.02      1171.69 o
   4   11    8       597.76       155.65       522.12 o
   5   11    8      8680.37       551.44      7995.94 o
   6   11    8      3937.43       323.89      4178.33 o
   7   11    8      7338.81       548.31      7252.23 o
   8   11    8       618.98       161.81       700.13 o
   9   11    8      2750.24       723.65      3111.41 o
 -12   12    8      1669.82       385.29      1839.55 o
  -9   12    8      1306.75       206.49      1045.88 o
  -8   12    8      2682.10       295.83      2299.20 o
  -7   12    8       603.67       174.17       580.33 o
  -6   12    8      2725.04       256.88      2912.76 o
  -5   12    8      5389.97       363.79      5364.10 o
  -4   12    8       524.44       160.76       520.30 o
  -3   12    8     12091.47       457.85     11867.92 o
  -2   12    8      3922.33       336.20      3881.29 o
  -1   12    8      4976.33       320.43      5106.53 o
   0   12    8     14956.71       576.55     16123.92 o
   1   12    8      4956.93       225.31      5077.99 o
   2   12    8      4178.53       217.99      4202.93 o
   3   12    8     12681.21       612.26     12559.68 o
   4   12    8       492.63       137.48       486.20 o
   5   12    8      5846.41       505.18      5459.73 o
   6   12    8      3192.62       299.43      3014.01 o
   7   12    8       648.43       197.16       622.50 o
   8   12    8      2522.37       283.43      2557.32 o
   9   12    8      1119.90       306.32      1145.15 o
  12   12    8      1141.89       502.34      1845.56 o
 -11   13    8       450.06       177.39       251.22 o
 -10   13    8      7288.78      1001.80      6783.17 o
  -8   13    8      6843.37       509.55      6512.49 o
  -6   13    8      4903.77       334.95      4707.33 o
  -5   13    8       421.33       159.63       350.81 o
  -4   13    8      5056.76       477.17      4745.83 o
  -3   13    8      1679.67       156.54      1753.10 o
  -2   13    8      4356.11       442.88      5364.10 o
  -1   13    8      4134.16       230.11      4359.96 o
   0   13    8      1528.12       121.07      1396.52 o
   1   13    8      3870.78       259.05      4201.63 o
   2   13    8      4976.33       351.98      4759.62 o
   3   13    8      1585.14       195.92      1635.39 o
   4   13    8      4712.89       432.31      4643.06 o
   5   13    8       348.50       151.60       385.34 o
   6   13    8      4052.70       389.94      4377.15 o
   8   13    8      6929.04       501.27      6318.66 o
   9   13    8       303.78       130.75       241.49 o
  10   13    8      8017.07       776.44      7150.39 o
 -10   14    8       476.72       161.54       458.82 o
  -9   14    8      1102.70       258.25      1192.32 o
  -8   14    8      1263.58       206.72      1275.92 o
  -7   14    8      2543.16       326.25      2302.08 o
  -5   14    8       939.01       221.44      1058.20 o
  -3   14    8      2412.98       283.98      2149.25 o
  -2   14    8      2680.31       313.55      2993.18 o
  -1   14    8      8375.32       541.66      8909.47 o
   0   14    8      2832.05       228.91      2775.18 o
   1   14    8      8590.83       465.66      8744.12 o
   2   14    8      2989.85       301.05      3004.14 o
   3   14    8      2123.06       275.89      2209.94 o
   5   14    8       901.43       209.73       974.06 o
   7   14    8      2021.25       340.36      2208.06 o
   8   14    8      1382.45       216.23      1396.52 o
   9   14    8      1277.07       279.15      1225.00 o
  -9   15    8      8667.55      1182.16      6975.59 o
  -8   15    8       401.10       143.35       386.52 o
  -7   15    8      2105.66       337.92      2076.62 o
  -6   15    8      4738.91       426.40      3603.60 o
  -5   15    8      2380.97       324.07      2322.28 o
  -4   15    8       684.86       153.99       553.19 o
  -3   15    8      2021.25       267.64      1893.99 o
  -2   15    8       778.83       133.49       809.40 o
  -1   15    8      1496.01       139.75      1563.41 o
   0   15    8       413.60        75.58       472.19 o
   1   15    8      1010.99        96.28      1506.22 o
   2   15    8       887.02       173.20       997.30 o
   3   15    8      2082.04       270.07      2085.75 o
   4   15    8       563.77       150.34       469.16 o
   5   15    8      2212.78       642.63      2437.40 o
   6   15    8      3057.97       707.88      3650.58 o
   7   15    8      1612.66       292.96      1838.69 o
   9   15    8      6834.84       964.42      6970.58 o
  -7   16    8      1377.34       277.13      1208.26 o
  -6   16    8       617.27       188.94       470.02 o
  -5   16    8       769.26       185.16       724.15 o
  -4   16    8      6481.08       465.41      5896.70 o
  -3   16    8       291.90       125.23       253.76 o
  -2   16    8      6775.22       447.53      6707.61 o
  -1   16    8       511.91       130.02       604.67 o
   0   16    8       940.06       167.76      1179.24 o
   1   16    8       571.14       122.53       757.35 o
   2   16    8      6024.03       491.43      6190.54 o
   4   16    8      5059.20      1108.77      5474.52 o
   5   16    8       512.69       163.62       822.54 o
   7   16    8      1041.85       237.69      1120.91 o
  -6   17    8      4076.84       375.71      3721.00 o
  -5   17    8      3138.41       934.97      3272.98 o
  -4   17    8      1605.76       304.74      1935.12 o
  -3   17    8       631.89       228.36       883.28 o
  -2   17    8       587.71       127.64       629.51 o
   2   17    8       565.40       144.01       479.17 o
   3   17    8       412.90       142.64       866.12 o
   4   17    8      1654.38       471.68      2080.27 o
   5   17    8      2310.97       736.14      3303.95 o
   6   17    8      2997.38       714.02      3815.53 o
  -3   18    8      3597.46      1015.46      3411.73 o
  -1   18    8      5856.94       550.41      4958.98 o
   0   18    8       561.32       245.40       541.03 o
   1   18    8      5519.59       444.84      4949.12 o
   3   18    8      2294.46       591.75      3437.48 o
   1    0    9     49316.46      1765.26     49355.07 o
   2    0    9       776.91       111.26       674.44 o
   3    0    9      3568.62       224.07      3667.51 o
   4    0    9       674.09       128.65       605.16 o
   5    0    9      1618.19       221.48      1440.96 o
   6    0    9      6324.14       528.15      5983.02 o
   7    0    9      5179.85       341.77      5340.69 o
   8    0    9      4942.40       275.79      5117.97 o
   9    0    9       247.85        67.72       267.65 o
  10    0    9      1480.08       157.54      1667.91 o
  11    0    9      8081.91       417.63      7828.71 o
  12    0    9      1370.96       187.30      1723.08 o
  13    0    9      1869.50       406.19      2096.72 o
 -12    1    9      4537.38       331.47      4415.60 o
 -11    1    9      3436.26       219.87      3326.98 o
 -10    1    9      5697.40       358.44      5334.84 o
  -9    1    9     12930.43       590.86     12710.31 o
  -8    1    9     10214.31       462.55      9984.01 o
  -7    1    9      1833.97       182.73      1665.46 o
  -6    1    9     11080.52       724.45     10475.52 o
  -5    1    9       980.58       174.57      1015.06 o
  -4    1    9      8860.84       421.10      8749.73 o
  -3    1    9      5770.36       363.34      5747.16 o
  -2    1    9      3678.41       250.44      3394.23 o
  -1    1    9     16167.03       704.44     15795.46 o
   0    1    9      1700.89       151.85      1447.80 o
   1    1    9     16647.46       732.59     16075.70 o
   2    1    9      4468.10       262.22      4294.18 o
   3    1    9      5796.53       353.69      5748.67 o
   4    1    9      9066.08       491.48      8918.91 o
   5    1    9      1325.48       181.66      1140.41 o
   6    1    9     12205.25       726.12     11257.21 o
   7    1    9      1745.17       221.38      1487.64 o
   8    1    9     10329.40       423.18      9960.04 o
   9    1    9     12832.79       565.24     12868.63 o
  10    1    9      5098.44       289.94      4711.45 o
  11    1    9      3678.41       279.66      3505.82 o
  12    1    9      4548.97       285.47      4210.71 o
 -12    2    9      3012.47       321.08      2578.61 o
 -11    2    9      2374.26       202.88      2323.24 o
 -10    2    9       594.40       101.51       428.90 o
  -9    2    9      4358.38       272.61      4655.33 o
  -8    2    9      1440.63       111.02      1513.21 o
  -7    2    9      4050.51       346.03      4567.06 o
  -6    2    9      1312.98       218.21      1102.24 o
  -5    2    9      8792.94       555.00      8290.10 o
  -4    2    9      6809.26       323.71      6325.02 o
  -3    2    9      2431.61       184.96      2494.00 o
  -2    2    9     17360.89       761.72     17397.61 o
  -1    2    9      2245.27       180.99      1896.60 o
   0    2    9     24032.05       912.20     24286.11 o
   1    2    9      2746.64       192.97      2193.05 o
   2    2    9     16950.74       752.67     17368.60 o
   3    2    9      2942.99       229.62      3025.00 o
   4    2    9      6269.52       395.08      6069.97 o
   5    2    9      7845.46       521.20      7691.29 o
   6    2    9      1158.23       145.22      1062.11 o
   7    2    9      5402.61       331.34      5025.39 o
   8    2    9      1698.06       147.47      1675.26 o
   9    2    9      4356.11       270.27      4565.70 o
  10    2    9       411.50       102.61       419.02 o
  11    2    9      1899.38       164.97      2169.70 o
  12    2    9      2890.96       218.32      2541.17 o
  14    2    9      1244.08       362.91      2109.56 o
 -13    3    9      4381.13      1696.87      5153.80 o
 -12    3    9      1026.36       392.47      1124.26 o
 -11    3    9      1873.97       286.01      1649.98 o
 -10    3    9       255.49        45.10       412.50 o
  -9    3    9      5981.37       268.80      5840.02 o
  -8    3    9       284.89        67.96       199.66 o
  -7    3    9     24455.33       758.76     24784.20 o
  -5    3    9     23962.76      1416.94     22419.07 o
  -4    3    9       824.62       138.34       776.18 o
  -2    3    9      5705.19       306.70      5617.50 o
  -1    3    9      1695.22       153.02      1588.82 o
   0    3    9     11200.38       451.58     11796.13 o
   1    3    9      1506.67       158.95      1413.01 o
   2    3    9      5550.31       320.46      5571.13 o
   4    3    9       648.43       129.69       626.50 o
   5    3    9     23475.19      1138.83     23031.10 o
   7    3    9     25099.90      1084.90     24749.58 o
   8    3    9       380.02        71.78       329.79 o
   9    3    9      6470.00       290.63      6382.41 o
  10    3    9       293.08        88.37       367.87 o
  11    3    9      2150.10       228.17      2033.11 o
  12    3    9      1148.88       218.11      1241.86 o
  13    3    9      5494.05       367.29      4981.54 o
  14    3    9       312.84       115.64       636.55 o
  15    3    9       892.16       282.65      1372.70 o
 -13    4    9      1199.58       282.46      1316.24 o
 -11    4    9       709.39       187.89       582.74 o
 -10    4    9      3509.26       391.39      3488.08 o
  -9    4    9      3099.98       285.47      2965.89 o
  -8    4    9      4548.97       162.46      4844.16 o
  -7    4    9       951.70        58.39      1064.72 o
  -6    4    9      4374.30       391.46      4024.63 o
  -5    4    9      6583.99       441.17      6123.06 o
  -4    4    9      7857.66       402.64      7551.61 o
  -3    4    9     19764.77       846.61     19332.12 o
  -2    4    9     11899.26       563.06     11796.13 o
  -1    4    9      2887.26       188.60      2707.12 o
   0    4    9      7021.00       328.70      6953.89 o
   1    4    9      2757.47       202.38      2357.10 o
   2    4    9     12235.68       589.99     12196.99 o
   3    4    9     20447.86       939.85     20192.41 o
   4    4    9      7525.70       420.91      7394.28 o
   5    4    9      6302.26       417.97      5909.00 o
   6    4    9      3866.50       340.22      3699.07 o
   7    4    9       804.00       102.45       958.52 o
   8    4    9      4750.76       213.46      4549.50 o
   9    4    9      2609.53       193.36      2810.06 o
  10    4    9      3278.75       212.80      3059.20 o
  11    4    9       676.78       117.27       670.81 o
  13    4    9       587.71       211.06      1303.21 o
 -14    5    9      1528.12       665.86      1990.94 o
 -13    5    9       397.66       171.55       399.20 o
 -12    5    9      4408.50       443.25      3857.65 o
 -11    5    9       872.73       243.98       723.61 o
 -10    5    9      6603.55       478.17      6116.80 o
  -9    5    9      1990.43       264.06      2098.56 o
  -8    5    9      6104.42       427.48      5348.00 o
  -7    5    9      2551.84       231.20      2748.90 o
  -6    5    9      7579.53       677.06      7262.45 o
  -5    5    9      2042.97       231.75      1719.76 o
  -4    5    9      8990.88       463.33      8154.09 o
  -3    5    9      3894.36       221.19      4152.51 o
  -2    5    9       978.43       107.64       786.24 o
  -1    5    9      8667.55       445.31      8606.27 o
   1    5    9      8964.79       410.53      9137.45 o
   2    5    9       782.68       112.64       627.00 o
   3    5    9      4349.30       358.56      4515.84 o
   4    5    9      8722.10       485.28      8310.15 o
   5    5    9      1432.80       362.11      1552.36 o
   6    5    9      7751.26       348.41      7691.29 o
   7    5    9      2302.71       142.01      2649.16 o
   8    5    9      5759.91       302.95      5386.09 o
   9    5    9      2071.06       145.64      2261.95 o
  10    5    9      6611.94       397.33      6543.19 o
  11    5    9       688.46       148.08       700.13 o
  12    5    9      3107.64       723.20      3765.05 o
  13    5    9       349.78       124.85       514.38 o
  14    5    9       937.95       316.16      1922.82 o
  15    5    9       262.69       103.18       473.93 o
 -13    6    9      2717.86       947.21      3021.70 o
 -12    6    9       692.99       208.35       534.53 o
 -11    6    9      3566.57       388.41      3041.52 o
 -10    6    9       417.81       156.85       505.80 o
  -9    6    9      1897.88       248.85      1986.48 o
  -8    6    9       450.06       169.36       420.25 o
  -7    6    9      3001.15       254.49      2518.03 o
  -6    6    9      2116.72       261.23      1846.42 o
  -5    6    9      1909.89       147.38      2177.16 o
  -4    6    9      2534.49       129.93      2587.76 o
  -3    6    9      4447.43       243.25      4266.70 o
  -2    6    9      6112.49       306.70      6043.51 o
  -1    6    9     24681.87      1000.14     24771.61 o
   0    6    9      1679.67       201.67      1300.32 o
   1    6    9     26542.97       986.71     26056.42 o
   2    6    9      7107.77       316.22      6947.22 o
   3    6    9      4762.63       249.35      4888.81 o
   4    6    9      2857.75       198.67      2756.25 o
   5    6    9      2001.19       184.73      1893.99 o
   6    6    9      1672.63       156.22      1685.92 o
   7    6    9      2680.31       171.03      2758.35 o
   8    6    9       424.16        81.50       534.07 o
   9    6    9      2148.51       161.10      2032.21 o
  10    6    9       295.44        75.71       383.77 o
  11    6    9      3140.34       393.39      3200.16 o
  12    6    9       500.30       129.31       548.50 o
  13    6    9      1981.23       546.81      3074.70 o
  14    6    9       843.50       217.87      1531.94 o
 -13    7    9      1031.88       263.08       956.05 o
 -12    7    9       825.61       178.96       608.61 o
 -11    7    9      9794.43       783.28      8886.83 o
 -10    7    9      2083.61       295.30      1906.20 o
  -9    7    9     17392.65       980.25     16113.76 o
  -8    7    9      2924.35       305.18      2950.66 o
  -7    7    9      2630.66       275.33      2310.72 o
  -6    7    9      1066.43       166.31      1038.13 o
  -5    7    9      2737.63       154.84      2922.48 o
  -4    7    9      4463.51       211.51      4418.26 o
  -3    7    9      9161.35       332.66      9298.74 o
  -2    7    9      2961.69       151.69      3115.87 o
  -1    7    9      3208.20       169.57      3132.64 o
   0    7    9       993.56       107.38       754.05 o
   1    7    9      2764.70       199.03      2647.10 o
   2    7    9      3556.30       203.16      3774.87 o
   3    7    9      9330.10       471.99      9838.66 o
   4    7    9      4703.44       292.64      4456.90 o
   5    7    9      2902.07       194.65      2980.07 o
   6    7    9       725.98       112.19       818.53 o
   7    7    9      1782.75       119.14      1919.32 o
   8    7    9      3006.81       158.50      3128.16 o
   9    7    9     16188.91       621.72     15813.06 o
  10    7    9      2063.24       153.18      1918.44 o
  11    7    9      8362.73       352.45      8337.52 o
  12    7    9       284.89       116.16       403.21 o
 -14    8    9      1551.08       281.89      1554.72 o
 -13    8    9      1520.06       414.56      1600.80 o
 -12    8    9      1740.86       381.91      1633.78 o
 -11    8    9       928.49       174.06       891.02 o
 -10    8    9      1333.01       217.35      1298.88 o
  -9    8    9      1833.97       252.00      1600.00 o
  -7    8    9      3741.28       309.41      3418.74 o
  -6    8    9      3196.51       284.05      2849.42 o
  -5    8    9      3791.97       332.68      3566.48 o
  -4    8    9     10696.33       398.60     10918.16 o
  -3    8    9      3720.26       172.11      3740.55 o
  -2    8    9     11645.37       497.60     11985.87 o
  -1    8    9      3056.07       176.92      3208.09 o
   0    8    9     18555.07       599.99     19049.52 o
   1    8    9      2928.08       175.03      3226.24 o
   2    8    9     11460.44       519.42     12106.60 o
   3    8    9      3216.00       236.13      3346.62 o
   4    8    9      9517.16       456.56     10002.00 o
   5    8    9      3745.49       233.76      3669.94 o
   6    8    9      2367.56       115.53      2792.07 o
   7    8    9      3025.71       183.61      3038.21 o
   8    8    9       303.78        71.97       232.56 o
   9    8    9      1600.25       112.88      1807.10 o
  10    8    9       842.50       133.84      1232.71 o
  11    8    9       386.08       112.24       742.02 o
 -13    9    9      4481.92       513.73      3926.28 o
 -12    9    9      2286.22       358.69      2016.01 o
 -11    9    9      2310.97       311.00      1842.98 o
 -10    9    9      6467.24       487.05      5779.04 o
  -9    9    9      2056.99       313.70      1868.83 o
  -8    9    9      1589.25       222.23      1504.66 o
  -7    9    9      6614.74       431.00      5688.18 o
  -6    9    9      2956.08       250.71      3070.27 o
  -5    9    9     16607.53      1379.16     18270.93 o
  -4    9    9       221.50        55.31       223.20 o
  -3    9    9       853.53       119.63      1001.72 o
  -2    9    9      3428.19       199.47      3451.56 o
  -1    9    9      1556.50       142.55      1527.25 o
   0    9    9      7012.36       328.50      7228.40 o
   1    9    9      1791.48       129.63      1582.45 o
   2    9    9      3440.29       191.74      3466.85 o
   3    9    9       961.28       148.30      1082.41 o
   4    9    9       423.45        75.77       382.98 o
   5    9    9     16629.71       843.13     17683.68 o
   6    9    9      2339.18       103.19      2865.46 o
   7    9    9      5207.13       337.71      5782.08 o
   8    9    9      1403.00        79.91      1756.45 o
   9    9    9      1273.38        85.96      1727.23 o
  10    9    9      5095.99       869.60      5416.96 o
 -13   10    9      1288.16       254.42       989.10 o
 -12   10    9      1116.45       235.71       793.55 o
 -11   10    9       378.67       166.07       327.25 o
 -10   10    9      1953.75       310.29      1992.73 o
  -9   10    9       426.29       148.49       370.95 o
  -8   10    9      1525.43       217.73      1407.75 o
  -6   10    9       953.83       162.60       791.86 o
  -5   10    9      7561.57       472.78      7123.36 o
  -4   10    9      1092.44       130.80      1212.43 o
  -3   10    9     16700.78       582.56     17004.16 o
  -2   10    9      1175.86       134.52      1255.99 o
  -1   10    9      8981.09       319.59      9141.27 o
   1   10    9      8942.00       396.99      9229.44 o
   2   10    9      1173.50       127.31      1546.85 o
   3   10    9     16745.28       663.49     17593.37 o
   4   10    9      1134.92       150.70      1399.51 o
   5   10    9      6817.78       534.17      6686.33 o
   6   10    9       828.58       163.44       925.38 o
   8   10    9      1468.19       249.20      1514.77 o
  10   10    9      1200.77       498.43      2203.36 o
  12   10    9       452.98       202.87       850.31 o
 -12   11    9      2806.47       348.19      2712.33 o
 -11   11    9      1041.85       241.03       952.34 o
 -10   11    9      2282.93       373.23      2261.00 o
  -9   11    9       334.51       140.35       340.03 o
  -8   11    9      6923.31       552.61      6446.48 o
  -7   11    9      1414.63       230.38      1417.52 o
  -6   11    9      8971.31       550.83      8219.24 o
  -5   11    9      1124.51       210.02      1011.24 o
  -4   11    9      2167.69       173.03      2319.39 o
  -3   11    9      3090.40       156.86      3236.47 o
  -2   11    9       258.25        68.02       265.69 o
  -1   11    9      6307.73       300.63      6494.75 o
   0   11    9      3513.34       224.36      3470.39 o
   1   11    9      6724.34       279.36      7079.54 o
   2   11    9       228.21        57.18       220.52 o
   3   11    9      2707.10       146.81      2987.72 o
   4   11    9      2307.66       183.49      2845.16 o
   5   11    9      1209.13       220.17      1186.80 o
   6   11    9      9075.91       704.83      8800.32 o
   7   11    9      1601.62       291.96      1391.29 o
   8   11    9      7209.67       625.28      6817.80 o
  10   11    9      2078.90       357.73      2336.76 o
 -11   12    9      1234.39       293.79      1120.91 o
  -9   12    9       725.98       167.82       639.08 o
  -7   12    9      2229.00       271.31      2248.66 o
  -6   12    9      1652.98       264.42      1581.65 o
  -5   12    9       967.69       169.13      1090.32 o
  -4   12    9      6820.62       537.12      7464.96 o
  -3   12    9      1291.87       107.60      1453.90 o
  -2   12    9      5904.44       388.69      6598.31 o
  -1   12    9      7787.66       355.30      8040.71 o
   0   12    9      1756.69       275.47      1910.56 o
   1   12    9      7148.45       354.95      7334.21 o
   2   12    9      6508.81       266.52      6867.44 o
   3   12    9      1038.52        77.63      1339.56 o
   4   12    9      8131.48       546.13      8049.68 o
   5   12    9       924.30       213.42      1044.58 o
   6   12    9      1841.34       236.26      1595.20 o
   7   12    9      2222.50       335.81      2201.49 o
   9   12    9       419.21       192.35       518.47 o
  11   12    9       870.70       279.23      1147.18 o
 -11   13    9      5015.24       750.58      4970.25 o
 -10   13    9      1002.25       271.26       921.12 o
  -9   13    9      6575.61       583.20      6096.49 o
  -7   13    9      4978.76       509.89      4794.18 o
  -6   13    9       516.59       124.36       345.59 o
  -5   13    9      1765.36       245.79      1813.06 o
  -4   13    9      1542.95       194.64      1656.49 o
  -3   13    9      4011.19       237.55      4244.52 o
  -2   13    9      1736.56       250.95      2047.56 o
  -1   13    9      1428.90       131.38      1547.64 o
   0   13    9       296.03        79.93       305.55 o
   1   13    9      1321.72       133.86      1468.42 o
   2   13    9      1865.04       185.76      2178.09 o
   3   13    9      4022.09       357.91      4099.84 o
   4   13    9      1358.25       224.47      1447.80 o
   5   13    9      2028.99       282.11      2135.36 o
   7   13    9      4879.70       490.37      4867.85 o
   9   13    9      7119.38       621.35      6456.12 o
  10   13    9       643.19       233.01       868.48 o
  11   13    9      4187.43      1581.00      5159.55 o
  -8   14    9      1019.76       186.81       908.42 o
  -7   14    9      1228.35       202.62      1151.24 o
  -6   14    9      1726.54       214.48      1518.66 o
  -5   14    9      1811.93       307.60      2136.29 o
  -4   14    9       991.39       195.03      1356.45 o
  -3   14    9       386.75        91.36       299.98 o
  -2   14    9      5239.46       308.86      5490.81 o
  -1   14    9      4445.13       360.20      4916.81 o
   0   14    9     13712.77       765.63     14246.81 o
   1   14    9      4769.75       404.02      5129.42 o
   2   14    9      4182.98       380.57      4571.11 o
   4   14    9      1159.40       187.47      1402.50 o
   5   14    9      1713.69       455.84      1900.96 o
   6   14    9      1316.72       322.16      1724.74 o
   7   14    9      1191.25       277.92      1229.20 o
   8   14    9       624.99       255.50       699.60 o
  -8   15    9      4238.81       441.36      4108.81 o
  -7   15    9      1231.97       219.82      1255.99 o
  -6   15    9      2676.75       359.63      2510.01 o
  -5   15    9      1911.40       306.91      1600.00 o
  -4   15    9      1725.11       358.74      1570.54 o
  -3   15    9      2418.05       252.13      2350.31 o
  -2   15    9      2606.01       212.56      2558.34 o
  -1   15    9      1040.74       134.33      1413.01 o
   0   15    9      2022.80       164.05      2253.40 o
   1   15    9      1316.72       307.17      1257.41 o
   2   15    9      2158.09       274.96      2433.45 o
   3   15    9      1792.93       275.39      2258.15 o
   4   15    9      1305.51       268.56      1663.82 o
   5   15    9      1300.54       379.74      1713.96 o
   6   15    9      1832.49       679.08      2472.08 o
   7   15    9      1609.90       298.23      1338.10 o
   8   15    9      4009.01       422.69      4075.55 o
  -5   16    9      2362.53       416.48      2094.89 o
  -3   16    9      4817.40       377.37      4523.91 o
  -2   16    9       919.08       153.35       813.39 o
  -1   16    9      1742.30       452.45      2424.58 o
   0   16    9       251.11        84.52       361.38 o
   1   16    9      1225.94       509.65      2180.89 o
   2   16    9       672.31       177.56       718.24 o
   3   16    9      3456.46       691.90      4022.10 o
   4   16    9       376.67       172.97       430.56 o
   5   16    9      1794.39       440.22      2143.69 o
  -6   17    9      3124.93      1050.30      3597.60 o
  -5   17    9      2071.06       740.73      2493.00 o
  -4   17    9      1138.40       466.74      1330.79 o
  -3   17    9       349.14       127.95       330.51 o
  -2   17    9      1500.00       278.54      1103.57 o
  -1   17    9       515.81       221.17       699.07 o
   0   17    9       532.35       232.63       596.34 o
   1   17    9       523.65       154.34       685.92 o
   2   17    9       604.51       186.13      1008.06 o
   4   17    9       822.65       311.88      1302.49 o
   5   17    9      1612.66       349.62      2352.25 o
   6   17    9      2354.18       734.64      3690.56 o
  -2   18    9      2810.12       829.99      3076.92 o
   0   18    9      1862.07       553.87      2255.30 o
   1   18    9       766.40       200.05       577.92 o
   2   18    9      3098.06       379.24      2988.81 o
   0    0   10      9655.30       635.68      9688.46 o
   2    0   10      2052.31       201.10      1584.84 o
   3    0   10      2042.97       197.53      1996.30 o
   5    0   10      7918.78       594.06      7826.94 o
   7    0   10     23707.75      1038.49     22701.45 o
   8    0   10      1476.11       163.94      1487.64 o
   9    0   10      7418.62       361.59      7255.63 o
  10    0   10      2002.73       177.10      1974.02 o
  11    0   10      3939.59       343.42      3971.52 o
  12    0   10      6313.19       360.91      6006.25 o
  13    0   10      3276.78       839.14      3659.04 o
 -12    1   10       401.10        94.42       420.25 o
 -11    1   10      1560.58       159.05      1411.50 o
 -10    1   10      1995.04       190.59      1822.44 o
  -9    1   10       420.62       113.62       464.83 o
  -8    1   10      1322.97       163.96      1483.02 o
  -7    1   10      1230.77       194.36      1128.96 o
  -6    1   10      5357.18       420.62      5028.23 o
  -5    1   10      9879.75       619.09      9376.05 o
  -4    1   10      4964.20       300.64      4884.61 o
  -3    1   10     11903.01       533.11     11342.25 o
  -2    1   10     15184.83       623.34     14947.51 o
  -1    1   10      2737.63       264.67      2503.00 o
   0    1   10     22303.90       930.19     21591.36 o
   1    1   10      2872.48       239.76      2542.18 o
   2    1   10     14249.84       665.46     14208.64 o
   3    1   10     12072.55       578.48     11618.68 o
   4    1   10      5091.07       309.37      5063.75 o
   5    1   10     10051.51       593.40      9769.35 o
   6    1   10      4853.30       397.95      4415.60 o
   7    1   10      1333.01       155.79      1208.26 o
   8    1   10      1794.39       166.17      1690.03 o
   9    1   10       623.27       103.95       643.13 o
  10    1   10      2102.50       194.08      1878.36 o
  11    1   10       902.46       191.24      1100.91 o
  12    1   10       461.07       112.31       419.02 o
  13    1   10       360.16       113.63       365.57 o
 -12    2   10      1676.85       639.74      2053.00 o
 -11    2   10      2416.36       202.98      2043.04 o
 -10    2   10      7781.58       424.97      7791.59 o
  -9    2   10      3298.48       231.23      3174.20 o
  -8    2   10     13608.20       485.72     13874.48 o
  -7    2   10      1627.90       184.66      1887.90 o
  -6    2   10     10445.14       682.28      9922.15 o
  -5    2   10      1078.83       247.53       882.68 o
  -4    2   10      7148.45       512.06      6727.28 o
  -3    2   10      5123.04       337.43      4828.86 o
  -2    2   10      6161.01       461.87      5516.03 o
  -1    2   10      4258.99       307.66      4092.16 o
   0    2   10      8413.15       486.07      8429.08 o
   1    2   10      4006.83       289.70      3772.42 o
   2    2   10      6395.49       349.50      6007.80 o
   3    2   10      4649.32       330.84      4319.12 o
   4    2   10      6866.17       496.14      6535.11 o
   5    2   10       946.40       172.55       828.29 o
   6    2   10     10846.33       641.50     10304.28 o
   7    2   10      2044.52       177.38      1977.58 o
   8    2   10     14447.69       566.66     14340.06 o
   9    2   10      3360.03       267.29      3314.30 o
  10    2   10      8109.77       440.04      7873.01 o
  11    2   10      2138.95       445.61      2201.49 o
  12    2   10      1311.73       391.34      1786.75 o
  13    2   10       342.74       115.31       450.71 o
  14    2   10      1423.70       207.74      1714.79 o
 -11    3   10      1784.20       263.09      1684.28 o
 -10    3   10       625.85        92.11       613.55 o
  -9    3   10       189.46        67.26       145.44 o
  -8    3   10       504.15        91.95       603.68 o
  -7    3   10      1975.10       133.05      2093.06 o
  -6    3   10      6185.34       473.61      5866.03 o
  -5    3   10      4112.07       379.54      3686.92 o
  -4    3   10      2069.49       237.94      2061.16 o
  -3    3   10      4313.06       275.71      4106.25 o
  -2    3   10      3406.07       234.97      3394.23 o
  -1    3   10     16629.71       732.20     16052.89 o
   1    3   10     15827.55       714.32     15146.22 o
   2    3   10      3259.07       251.45      3308.55 o
   3    3   10      5015.24       350.92      4953.34 o
   4    3   10      2409.60       273.65      2209.94 o
   5    3   10      3440.29       369.36      3102.49 o
   6    3   10      5710.39       366.65      5788.17 o
   7    3   10      1981.23       186.86      1857.61 o
   8    3   10       410.80       108.80       503.10 o
   9    3   10       232.91       100.31       208.80 o
  10    3   10       683.96       102.59       712.89 o
  11    3   10      1126.82       286.47      1719.76 o
  13    3   10      1908.39       336.73      2058.44 o
  14    3   10       689.37       290.93      1403.25 o
 -12    4   10       982.74       313.92      1013.15 o
 -11    4   10      3836.60       590.41      3767.50 o
 -10    4   10      3749.71       347.68      3225.10 o
  -9    4   10     12239.49       730.94     11646.73 o
  -8    4   10      4846.11       491.08      4610.41 o
  -7    4   10      2743.03       180.23      2751.00 o
  -6    4   10     10900.15      1056.24     10514.45 o
  -5    4   10      7044.09       488.09      6473.81 o
  -4    4   10     14114.60       605.06     13583.90 o
  -3    4   10     10892.97       542.31     10259.66 o
  -2    4   10      3272.84       234.27      3120.34 o
  -1    4   10      2644.80       217.67      2516.03 o
   0    4   10       942.17       128.86       997.30 o
   1    4   10      2761.08       229.64      2819.61 o
   2    4   10      3231.63       234.74      3346.62 o
   3    4   10     10103.33       588.01      9735.77 o
   4    4   10     15091.69       942.70     14106.31 o
   5    4   10      5888.59       573.01      5665.57 o
   6    4   10     10231.71       633.50     10551.40 o
   7    4   10      2627.13       273.38      2567.45 o
   8    4   10      4810.24       312.65      5194.08 o
   9    4   10     11233.18       506.95     11261.45 o
  10    4   10      3392.02       248.51      3253.56 o
  11    4   10      2976.69       658.98      3640.92 o
  12    4   10      1023.06       255.35      1184.74 o
  13    4   10       422.74       125.94       806.56 o
  14    4   10       479.73       158.28      1013.79 o
 -14    5   10      2154.89       402.54      2077.54 o
 -13    5   10       785.57       289.34       724.69 o
 -12    5   10      1596.12       470.18      1616.04 o
 -10    5   10      4853.30       429.11      4126.78 o
  -9    5   10      2957.95       333.13      2819.61 o
  -7    5   10       405.24        54.03       442.26 o
  -6    5   10      4853.30       409.94      4490.34 o
  -5    5   10      3798.33       415.67      3374.45 o
  -4    5   10     10699.89       530.37     10574.01 o
  -3    5   10      1868.02       184.42      1929.84 o
  -2    5   10     16443.85       798.70     16240.95 o
  -1    5   10       692.99       122.29       775.07 o
   0    5   10     27618.85      1195.23     26481.05 o
   1    5   10       805.95       133.84       820.82 o
   2    5   10     17886.22       800.77     17830.26 o
   3    5   10      1975.10       203.40      2079.36 o
   4    5   10     10639.46       663.75     10737.10 o
   5    5   10      3898.66       410.39      3756.46 o
   6    5   10      4072.44       327.20      4038.60 o
   8    5   10       172.79        64.23       225.00 o
   9    5   10      2689.23       214.14      2573.53 o
  10    5   10      4205.27       292.33      3958.93 o
  12    5   10      1372.24       339.08      1695.79 o
  13    5   10       427.00       119.46       739.84 o
  14    5   10      1609.90       328.61      2285.80 o
 -14    6   10       497.22       186.46       503.10 o
 -12    6   10      2404.53       450.53      1990.05 o
 -11    6   10      1859.10       283.39      1807.95 o
 -10    6   10      2207.93       286.20      1934.24 o
  -9    6   10      3890.07       530.12      3923.77 o
  -8    6   10      5427.94       400.57      5530.90 o
  -7    6   10      6951.97       519.32      6294.84 o
  -6    6   10      1184.14       100.65      1297.44 o
  -5    6   10     11229.53       681.90     10406.04 o
  -4    6   10      1637.63       172.68      1506.22 o
  -3    6   10      1534.86       148.30      1546.85 o
  -2    6   10      5671.45       305.79      5425.80 o
  -1    6   10       859.57       141.24       970.95 o
   0    6   10     18639.54       737.59     18512.32 o
   1    6   10      1063.06       129.03      1138.39 o
   2    6   10      6198.88       352.21      5949.04 o
   3    6   10      1579.67       188.74      1531.94 o
   4    6   10      1492.02       171.47      1492.28 o
   5    6   10     10445.14       509.95     10124.38 o
   6    6   10      1227.15       148.27      1255.99 o
   7    6   10      6134.03       274.90      6241.00 o
   8    6   10      4762.63       261.23      5443.49 o
   9    6   10      4258.99       217.83      4088.32 o
  10    6   10      1828.08       170.67      1916.69 o
  11    6   10      1520.06       304.55      1900.96 o
  12    6   10      1421.10       367.11      1827.56 o
 -14    7   10      1330.49       466.93      1513.99 o
 -13    7   10       989.22       378.80      1105.56 o
 -12    7   10       415.00       190.67       593.90 o
 -11    7   10       575.26       191.48       458.39 o
 -10    7   10      4981.18       529.45      4177.04 o
  -9    7   10      2154.89       261.97      1807.95 o
  -8    7   10      2705.31       354.38      2599.98 o
  -7    7   10       543.53       162.05       688.54 o
  -6    7   10       564.58        88.31       890.43 o
  -5    7   10      1508.01       137.64      1451.61 o
  -4    7   10      4651.67       213.57      4599.55 o
  -3    7   10      8603.60       357.49      8532.22 o
  -2    7   10     10860.67       412.41     10461.20 o
  -1    7   10      8508.11       342.80      8802.19 o
   0    7   10      1647.39       134.08      1476.86 o
   1    7   10      9581.05       434.51      9545.29 o
   2    7   10     10210.84       514.63     10322.56 o
   3    7   10      7699.84       543.52      7869.46 o
   4    7   10      4167.42       386.53      4169.28 o
   5    7   10      1449.79       178.19      1570.54 o
   6    7   10       557.25       134.03       634.54 o
   7    7   10       764.49        95.15       919.30 o
   8    7   10      2752.05       175.11      3088.02 o
   9    7   10      1841.34       175.72      1894.86 o
  10    7   10      3531.72       521.48      3906.25 o
  11    7   10       369.36       113.75       470.46 o
  12    7   10       314.67       120.86       509.40 o
 -13    8   10       436.29       188.32       535.92 o
 -12    8   10      6544.95       540.08      5192.64 o
 -11    8   10       531.56       188.03       500.42 o
 -10    8   10      6447.88       536.06      5505.64 o
  -8    8   10      7192.15       513.62      6464.16 o
  -7    8   10      1205.55       285.56      1401.75 o
  -6    8   10      6442.35       458.49      6088.68 o
  -5    8   10      1218.72        90.10      1548.42 o
  -4    8   10      8010.91       314.15      7880.11 o
  -3    8   10      1134.92       107.81      1194.39 o
  -2    8   10       792.33        88.14       734.95 o
  -1    8   10      3450.39       212.24      3456.26 o
   1    8   10      3350.07       195.19      3560.51 o
   2    8   10       675.88       105.56       646.18 o
   3    8   10       709.39       123.73       865.54 o
   4    8   10      7793.73       419.23      7793.36 o
   5    8   10      1455.03       133.89      1559.46 o
   6    8   10      6158.31       318.65      6272.64 o
   7    8   10      1506.67       102.85      1722.25 o
   8    8   10      5901.80       240.57      6549.66 o
  10    8   10      5172.42       274.71      5481.92 o
 -13    9   10      1865.04       328.43      1455.42 o
 -12    9   10       797.18       324.51      1034.27 o
 -11    9   10      1085.62       230.16      1173.06 o
  -9    9   10      1625.12       210.86      1448.56 o
  -8    9   10      1171.15       197.84       926.59 o
  -7    9   10      1339.30       192.68      1147.18 o
  -6    9   10      5329.51       356.72      5146.63 o
  -5    9   10       898.33       147.49      1212.43 o
  -4    9   10      4810.24       233.89      5038.16 o
  -3    9   10      4134.16       190.28      4162.83 o
  -2    9   10      5671.45       264.33      5698.74 o
  -1    9   10     11055.18       448.65     11455.42 o
   0    9   10      4932.73       287.60      5356.78 o
   1    9   10     11222.24       514.00     11588.52 o
   2    9   10      6010.68       365.50      6174.82 o
   3    9   10      3574.79       238.66      3882.54 o
   4    9   10      4319.84       239.74      4795.56 o
   5    9   10      1335.52       149.65      1376.41 o
   6    9   10      3849.40       320.25      4542.76 o
   7    9   10      1127.98        90.15      1327.14 o
   8    9   10       743.70       100.41      1020.16 o
   9    9   10       873.75       186.14      1588.02 o
 -12   10   10       587.71       226.91       539.63 o
 -11   10   10      5944.17       610.20      5565.16 o
 -10   10   10      1091.30       194.39       936.97 o
  -9   10   10      6983.57       684.41      6218.90 o
  -8   10   10       450.79       176.81       306.95 o
  -7   10   10      6304.99       505.49      5572.62 o
  -6   10   10      1283.22       187.37      1255.28 o
  -5   10   10      3261.04       503.06      3527.17 o
  -4   10   10      2322.56       121.06      2436.41 o
  -3   10   10      1030.78       112.69       954.19 o
  -2   10   10       996.81       111.90      1404.00 o
  -1   10   10       673.20        99.11       710.22 o
   1   10   10       755.01       135.21       846.81 o
   2   10   10      1353.18       118.99      1390.54 o
   3   10   10       948.52       125.06       765.63 o
   4   10   10      2515.47       195.02      2412.77 o
   5   10   10      3396.03       393.05      4143.50 o
   6   10   10       802.05        60.42      1168.96 o
   7   10   10      6190.76       544.21      5634.00 o
   9   10   10      7717.97       634.85      7049.28 o
 -12   11   10      2306.01       535.40      2111.40 o
 -10   11   10       522.87       178.62       496.40 o
  -9   11   10      1130.29       246.42       992.88 o
  -7   11   10      3080.85       357.17      2577.59 o
  -6   11   10      2804.65       306.16      2688.42 o
  -5   11   10       378.01       130.46       432.64 o
  -4   11   10      4729.44       556.13      5653.54 o
  -3   11   10       186.63        57.35       142.09 o
  -2   11   10     10639.46       528.87     10654.37 o
  -1   11   10      1021.96       154.01      1298.16 o
   0   11   10     11328.21       523.74     12009.97 o
   1   11   10      1412.04       131.89      1479.17 o
   2   11   10     10193.46       455.13     10346.96 o
   3   11   10       160.80        55.42       181.17 o
   4   11   10      4639.94       391.45      5521.98 o
   5   11   10       374.67        45.29       656.38 o
   6   11   10      2666.08       302.06      2824.92 o
   7   11   10      2015.07       688.94      2554.29 o
  12   11   10      1538.90       680.36      2201.49 o
 -10   12   10      2828.39       419.09      2551.26 o
  -9   12   10      1510.68       244.76      1159.40 o
  -8   12   10      3753.92       533.41      3714.90 o
  -7   12   10      2386.01       285.75      2104.97 o
  -6   12   10      3310.35       310.84      3000.85 o
  -5   12   10      4670.46       388.03      4113.94 o
  -4   12   10      1358.25       133.16      1914.94 o
  -3   12   10      1547.01       135.35      1999.88 o
  -2   12   10       749.34        90.43       868.48 o
   0   12   10      4651.67       251.12      4812.20 o
   2   12   10       811.82        95.11       830.02 o
   3   12   10      1766.80       117.16      2334.82 o
   4   12   10      1675.45       214.10      1871.43 o
   5   12   10      4579.20       428.46      4430.23 o
   6   12   10      2623.61       345.47      2943.06 o
   7   12   10      2206.31       316.80      2125.21 o
   8   12   10      3682.58       482.38      3728.32 o
   9   12   10      1117.60       315.21      1045.23 o
  10   12   10      1946.15       892.62      2738.43 o
 -10   13   10      1040.74       216.47       789.61 o
  -8   13   10      1952.23       325.37      1764.00 o
  -5   13   10      3682.58       350.82      3220.56 o
  -4   13   10       702.99       108.57       957.90 o
  -3   13   10      6800.74       454.04      7247.12 o
  -2   13   10      2402.85       288.44      2787.84 o
  -1   13   10      7288.78       499.43      8379.57 o
   1   13   10      7303.48       405.83      8248.27 o
   2   13   10      2188.57       241.47      2854.76 o
   3   13   10      6581.19       563.90      6728.92 o
   4   13   10      1197.20       207.17      1061.46 o
   5   13   10      2929.94       417.23      2992.09 o
   8   13   10      1505.34       419.23      1673.63 o
  -9   14   10       990.30       241.48      1051.70 o
  -8   14   10      2907.63       372.96      2537.14 o
  -7   14   10      2019.70       290.74      1853.30 o
  -6   14   10      4973.90       560.61      4579.23 o
  -5   14   10      1661.39       231.43      1698.26 o
  -4   14   10      1792.93       278.30      1594.40 o
  -2   14   10       431.99       109.43       746.38 o
  -1   14   10      3388.01       476.71      4307.30 o
   0   14   10      1197.20       352.43      1912.31 o
   1   14   10      3278.75       252.21      4107.53 o
   2   14   10       830.56       270.74       887.44 o
   4   14   10      1853.17       330.34      1680.18 o
   5   14   10       919.08       407.90      1595.20 o
   6   14   10      3913.71      1162.49      4549.50 o
   7   14   10      1713.69       287.75      1689.21 o
   8   14   10      2312.62       488.17      2351.28 o
   9   14   10       759.74       298.78       900.60 o
  -6   15   10      1563.30       356.47      1678.54 o
  -4   15   10      4727.07       430.59      4579.23 o
  -3   15   10      1079.96       223.91      1259.54 o
  -2   15   10      5635.23       379.73      6107.42 o
  -1   15   10      1353.18       425.32      2687.39 o
   0   15   10      3864.36       352.96      4039.87 o
   1   15   10      1982.76       421.37      2494.00 o
   2   15   10      4942.40       491.10      5703.27 o
   3   15   10      1078.83       200.06      1222.20 o
   4   15   10      4475.01       444.28      4444.89 o
   6   15   10      1185.32       434.79      1790.98 o
  -5   16   10      2446.90       343.84      2150.18 o
  -4   16   10       966.62       225.74      1120.24 o
  -3   16   10      1791.48       214.10      1648.36 o
  -2   16   10       798.16       140.97      1128.29 o
  -1   16   10       784.60       213.02       824.84 o
   3   16   10       984.90       341.26      1574.50 o
   4   16   10       896.27       407.96      1141.76 o
   5   16   10      1917.42       358.62      2130.75 o
  -4   17   10       645.81       193.26       832.90 o
  -3   17   10      1040.74       202.04      1092.30 o
  -2   17   10      2499.96       736.39      2589.79 o
  -1   17   10      2082.04       526.00      2926.81 o
   0   17   10      1833.97       530.52      2296.33 o
   1   17   10      2016.61       661.39      2733.20 o
   3   17   10       799.13       287.94       998.56 o
   4   17   10       934.79       271.44      1054.95 o
   1    0   11       366.06       105.34       314.35 o
   2    0   11      3320.26       261.73      2983.34 o
   3    0   11      3513.34       305.95      3101.38 o
   4    0   11      5460.94       356.01      5125.13 o
   5    0   11      1752.37       275.14      1677.72 o
   6    0   11     19079.02      1240.56     17400.25 o
   8    0   11      6277.70       308.09      6514.10 o
   9    0   11       253.29       100.22       221.41 o
  10    0   11      4301.77       268.58      4178.33 o
  11    0   11      1067.56       303.57      1319.14 o
  12    0   11      5891.23       446.37      5539.82 o
 -13    1   11      1386.30       622.68      1727.23 o
 -11    1   11       759.74       162.19       876.75 o
 -10    1   11       253.84       100.33       299.64 o
  -9    1   11       160.36        74.52       203.06 o
  -8    1   11      1570.11       143.17      1577.68 o
  -7    1   11       866.65       126.63       834.63 o
  -6    1   11      3124.93       407.81      3158.44 o
  -5    1   11      7347.66       598.79      7027.47 o
  -4    1   11      5491.50       469.21      4855.30 o
  -3    1   11      6926.18       463.94      6489.91 o
  -2    1   11      3688.85       292.60      3210.36 o
  -1    1   11      5581.11       367.62      5129.42 o
   0    1   11      1841.34       311.57      1393.53 o
   1    1   11      5494.05       469.32      5115.11 o
   2    1   11      3523.54       324.78      3192.25 o
   3    1   11      7183.40       527.89      6724.00 o
   4    1   11      5281.89       457.66      4781.72 o
   5    1   11      6357.02       565.19      6229.94 o
   6    1   11      3583.03       393.42      3432.79 o
   7    1   11       887.02       141.43       900.60 o
   8    1   11      1710.84       153.72      1603.20 o
  10    1   11       361.46        87.67       406.02 o
  11    1   11       595.24       143.56       819.68 o
  13    1   11      1087.89       352.98      1636.20 o
 -10    2   11      2115.14       398.81      2171.56 o
  -9    2   11      9043.16       458.13      9025.00 o
  -8    2   11      1870.99       162.24      2036.72 o
  -7    2   11     12607.69       707.08     13071.35 o
  -6    2   11       472.97       161.65       568.82 o
  -5    2   11     10131.02       886.68      9826.76 o
  -4    2   11      3890.07       326.23      3458.62 o
  -3    2   11      5362.22       367.90      4576.52 o
  -2    2   11      4319.84       386.75      4294.18 o
  -1    2   11      6037.39       382.35      5574.12 o
   0    2   11       297.22       107.97       322.92 o
   1    2   11      5488.95       354.37      5222.95 o
   2    2   11      4886.92       322.35      4814.97 o
   3    2   11      5666.27       354.87      5015.47 o
   4    2   11      3720.26       346.32      3403.56 o
   5    2   11     11214.95       863.67     10863.89 o
   6    2   11       495.69       178.51       442.26 o
   7    2   11     13692.63       748.96     13176.74 o
   8    2   11      2682.10       178.21      2587.76 o
   9    2   11      9410.04       427.27      9354.76 o
  10    2   11      1681.08       385.17      2156.67 o
  12    2   11       418.51       124.60       761.76 o
  13    2   11      1993.50       439.41      2601.00 o
  14    2   11       478.23       131.69       690.11 o
 -11    3   11      1549.72       566.24      1574.50 o
 -10    3   11       600.29        69.98       622.50 o
  -9    3   11      2532.75       193.96      2675.99 o
  -8    3   11       806.93       132.94       963.48 o
  -7    3   11      1295.58       123.86      1302.49 o
  -6    3   11      2567.51       489.96      2289.62 o
  -5    3   11       523.65       172.45       613.06 o
  -4    3   11      3482.81       264.00      3203.56 o
  -3    3   11      4225.37       322.10      3855.17 o
  -2    3   11     11456.76       637.20     10962.09 o
  -1    3   11      6467.24       420.63      6085.56 o
   0    3   11     23322.54      1234.97     22317.37 o
   1    3   11      5786.05       484.24      5653.54 o
   2    3   11     11933.06       736.77     11314.58 o
   3    3   11      3967.72       348.98      3684.49 o
   4    3   11      3336.14       323.97      3140.48 o
   5    3   11       701.16       155.81       613.06 o
   6    3   11      2201.46       298.70      2132.59 o
   7    3   11      1448.48       222.64      1366.78 o
   8    3   11      1109.56       120.36      1142.44 o
   9    3   11      2924.35       215.86      2833.43 o
  10    3   11       439.89       118.36       573.60 o
  11    3   11       817.72       352.28      1755.61 o
  13    3   11       271.12        97.46       263.09 o
  14    3   11      1752.37       319.79      2092.15 o
 -12    4   11      1534.86       496.11      1643.49 o
 -11    4   11      3466.58      1231.84      3819.24 o
 -10    4   11      6005.35       546.67      5331.92 o
  -9    4   11      3223.81       367.32      3030.50 o
  -8    4   11      5875.39       445.76      6264.72 o
  -7    4   11      1784.20       136.63      1840.41 o
  -6    4   11      2637.73       334.02      2633.74 o
  -5    4   11      5684.42       539.64      5220.06 o
  -4    4   11      6058.80       420.53      5513.06 o
  -3    4   11      2421.44       255.69      2083.92 o
  -2    4   11      3745.49       269.57      3478.64 o
  -1    4   11      8007.83       477.30      7793.36 o
   0    4   11      2102.50       203.54      1946.57 o
   1    4   11      8143.90       444.07      8028.16 o
   2    4   11      3847.26       279.61      3559.32 o
   3    4   11      2753.85       234.75      2426.55 o
   4    4   11      5319.47       426.66      5272.21 o
   5    4   11      5204.64       461.75      5628.00 o
   6    4   11      2639.50       318.22      2518.03 o
   7    4   11      2225.75       241.89      2109.56 o
   8    4   11      6946.24       341.29      6735.48 o
   9    4   11      3741.28       250.47      3646.95 o
  10    4   11      6544.95       386.96      5950.58 o
  11    4   11      3486.87       910.33      3800.72 o
  12    4   11       764.49       249.28      1386.82 o
  13    4   11       379.34       148.12       671.33 o
 -13    5   11      1516.04       458.23      1442.48 o
 -12    5   11       484.26       223.39       314.35 o
 -11    5   11      1280.76       284.48      1153.28 o
 -10    5   11      2111.98       273.58      1961.60 o
  -9    5   11      1474.79       241.83      1548.42 o
  -8    5   11       968.77        68.55      1519.44 o
  -7    5   11      2555.32       189.60      3200.16 o
  -5    5   11     11306.24       808.63      9990.00 o
  -4    5   11      1854.65       185.24      1690.03 o
  -3    5   11     17950.71       935.92     17561.55 o
  -2    5   11      2172.50       197.28      1943.05 o
  -1    5   11     24773.86      1083.25     24198.91 o
   1    5   11     25488.46      1115.24     24831.46 o
   2    5   11      2027.44       241.71      1820.73 o
   3    5   11     17428.97       904.04     17958.68 o
   4    5   11      2061.67       232.81      1944.81 o
   5    5   11     10315.42       639.58      9621.65 o
   7    5   11      3233.58       238.73      3410.56 o
   8    5   11      1130.29       143.46      1422.80 o
   9    5   11      1594.75       169.03      1524.90 o
  10    5   11      1414.63       332.62      1895.73 o
  11    5   11       848.51       228.54      1203.40 o
  12    5   11       259.91       116.50       397.60 o
  13    5   11      1259.91       235.74      1613.63 o
 -12    6   11      2664.30       923.63      2548.23 o
 -11    6   11       877.82       283.43       733.33 o
 -10    6   11      3548.10       362.80      2849.42 o
  -9    6   11      2520.65       316.16      2373.64 o
  -8    6   11     11051.56       810.33      9958.04 o
  -7    6   11      3251.22       480.72      3515.30 o
  -6    6   11      8673.96       798.01      7589.89 o
  -5    6   11       638.83       169.60       627.00 o
  -4    6   11      8651.54       425.70      8188.44 o
  -3    6   11      6179.93       397.66      5873.69 o
  -2    6   11       613.00       141.43       468.29 o
  -1    6   11      1134.92       151.86       930.25 o
   0    6   11      1668.41       209.43      1808.80 o
   1    6   11       925.35       170.62       736.58 o
   2    6   11       379.34       119.30       296.18 o
   3    6   11      5925.61       487.40      5939.78 o
   4    6   11      7848.51       512.16      7749.28 o
   5    6   11       392.19       115.85       435.14 o
   6    6   11      7262.36       410.55      7019.09 o
   7    6   11      3638.86       290.61      3897.50 o
   8    6   11      9770.60       486.40      9932.12 o
   9    6   11      2436.70       180.06      2589.79 o
  10    6   11      2379.29       469.98      2922.48 o
  11    6   11       576.09       161.06       704.90 o
  12    6   11      1964.41       477.38      2591.83 o
  13    6   11       277.39        99.15       257.60 o
 -13    7   11      1158.23       292.78       992.25 o
 -12    7   11       988.14       288.82       927.20 o
  -7    7   11      2567.51       346.98      2694.65 o
  -6    7   11      2374.26       298.46      2300.16 o
  -5    7   11      1603.00       162.57      1475.33 o
  -4    7   11      8168.76       357.67      8545.15 o
  -3    7   11      7681.73       307.63      7444.24 o
  -2    7   11      2616.56       228.83      2628.61 o
  -1    7   11      5357.18       274.53      5698.74 o
   0    7   11      2071.06       178.53      2203.36 o
   1    7   11      5309.43       298.38      5433.16 o
   2    7   11      3894.36       277.02      3844.00 o
   3    7   11      6586.78       480.36      6604.81 o
   4    7   11      7300.54       582.16      7855.28 o
   5    7   11       759.74       192.54       929.03 o
   6    7   11      1885.91       252.55      1818.17 o
   7    7   11      2650.11       294.06      2533.11 o
  11    7   11       332.62       109.20       553.66 o
 -13    8   11      1894.88       689.05      1994.52 o
 -11    8   11      4456.61       960.24      4366.57 o
  -9    8   11      7394.93       621.42      6564.24 o
  -7    8   11     11240.48       642.10     10152.58 o
  -6    8   11      1456.35       265.27      1450.09 o
  -5    8   11      8119.07       725.55      8945.38 o
  -4    8   11      2524.10       165.97      2661.53 o
  -3    8   11      2121.48       185.44      2331.92 o
  -2    8   11      2623.61       222.09      2766.76 o
   0    8   11      2019.70       160.83      2057.53 o
   1    8   11       178.26        80.40       105.88 o
   2    8   11      2648.34       240.84      2484.03 o
   3    8   11      2077.33       186.64      2187.43 o
   4    8   11      1854.65       200.06      2205.24 o
   5    8   11      8792.94       425.93      8792.81 o
   6    8   11      1743.74       182.49      1500.01 o
   7    8   11      9056.25       592.73     10092.21 o
   8    8   11       169.19        64.90       183.60 o
   9    8   11      6000.01       394.49      6252.06 o
 -12    9   11      2100.92       763.40      2289.62 o
 -11    9   11       737.15       234.50       626.50 o
  -9    9   11      1477.43       218.24      1208.26 o
  -8    9   11      1272.15       200.06      1118.23 o
  -7    9   11      1470.83       229.63      1706.52 o
  -6    9   11      2569.25       326.17      2380.46 o
  -5    9   11      1048.53        95.83      1270.21 o
  -4    9   11      2572.74       197.23      2649.16 o
  -3    9   11      4413.07       256.03      4517.18 o
  -2    9   11      4903.77       253.02      5256.25 o
  -1    9   11      5007.94       304.40      4830.25 o
   0    9   11     14717.79       555.23     14803.59 o
   1    9   11      5059.20       327.98      5138.02 o
   2    9   11      4750.76       294.11      5050.94 o
   3    9   11      4621.21       322.82      4628.08 o
   4    9   11      2312.62       218.44      2551.26 o
   5    9   11       966.62       130.52      1117.56 o
   6    9   11      2198.24       177.47      2624.51 o
   7    9   11      1108.42       146.64      1697.44 o
   8    9   11       609.60       115.55       994.77 o
 -12   10   11      2411.29       375.13      2059.34 o
 -11   10   11      1238.02       464.94      1456.19 o
 -10   10   11      5833.26       657.05      4937.87 o
  -9   10   11      1382.45       245.66      1309.72 o
  -8   10   11      3849.40       392.84      3065.84 o
  -7   10   11       945.35       189.39       752.95 o
  -6   10   11      5029.88       385.60      4401.00 o
  -5   10   11       163.43        49.27       192.10 o
  -4   10   11      2126.23       149.15      2417.69 o
  -3   10   11       449.33        79.51       388.88 o
  -2   10   11      3344.09       200.98      3415.23 o
  -1   10   11      6321.40       339.26      6146.56 o
   0   10   11      2104.08       197.31      2174.36 o
   1   10   11      5668.86       334.22      5987.66 o
   2   10   11      3092.32       281.29      3326.98 o
   3   10   11       288.39        88.24       244.92 o
   4   10   11      2030.54       299.27      2226.90 o
   5   10   11       265.49        65.60       265.04 o
   6   10   11      4050.51       413.92      4599.55 o
   7   10   11       470.73        68.69       786.24 o
   8   10   11      2525.83      1020.36      3060.30 o
  10   10   11      6048.09       636.92      4997.08 o
 -11   11   11      1633.46       319.88      1376.41 o
 -10   11   11      1216.32       267.63      1228.50 o
  -9   11   11      1368.42       246.95       977.81 o
  -8   11   11       963.42       222.16       936.36 o
  -7   11   11       691.18       188.17       571.69 o
  -6   11   11       809.86       178.23       728.46 o
  -5   11   11      2232.25       312.16      2129.82 o
  -4   11   11       714.90        83.73       847.39 o
  -3   11   11      2931.80       208.68      3324.68 o
  -2   11   11      1888.90       207.88      2139.99 o
  -1   11   11     11940.58       500.11     12501.48 o
   0   11   11      1788.57       170.27      1819.88 o
   1   11   11     11589.74       626.07     12401.05 o
   2   11   11      1705.15       161.99      1938.64 o
   3   11   11      3080.85       215.83      3390.73 o
   4   11   11       826.60       120.70       854.98 o
   5   11   11      1695.22       286.20      2346.43 o
   6   11   11       891.13       192.09       828.29 o
   7   11   11       417.10       183.43       775.07 o
   8   11   11       684.86       219.73       828.86 o
   9   11   11       651.94       264.47       917.48 o
 -10   12   11      1488.03       280.08      1009.97 o
  -9   12   11      2183.74       485.63      1982.03 o
  -8   12   11      1368.42       249.50      1193.70 o
  -7   12   11      2628.90       314.06      2144.62 o
  -6   12   11      2387.69       326.21      2325.17 o
  -5   12   11      2737.63       333.09      2743.66 o
  -4   12   11       626.71       174.88       921.12 o
  -3   12   11      2687.44       233.69      3266.12 o
  -2   12   11       309.81       101.15       234.09 o
  -1   12   11       608.75       148.58       658.44 o
   0   12   11      3877.20       272.12      4395.69 o
   1   12   11       603.67       106.53       618.52 o
   2   12   11       267.73        76.58       256.32 o
   3   12   11      2562.28       205.54      3082.47 o
   4   12   11       809.86       198.79      1162.13 o
   5   12   11      2907.63       413.79      3022.80 o
   6   12   11      2505.12       359.97      2419.66 o
   7   12   11      1911.40       398.68      1843.84 o
   8   12   11      1432.80       317.82      1151.24 o
   9   12   11      2462.25       391.02      2069.34 o
  10   12   11      1036.31       371.10      1073.22 o
  -8   13   11       491.10       199.80       448.59 o
  -7   13   11      1586.51       291.95      1584.84 o
  -6   13   11      2281.29       285.98      1850.72 o
  -5   13   11      1279.53       232.64      1499.24 o
  -4   13   11      4995.77       537.52      5649.03 o
  -2   13   11      6245.03       698.88      8266.45 o
  -1   13   11       482.75       120.22       682.25 o
   0   13   11      5192.24       327.30      5557.70 o
   1   13   11       512.69       134.79       694.85 o
   2   13   11      6937.64       590.44      8012.04 o
   4   13   11      5997.35       461.03      5907.46 o
   5   13   11      1230.77       394.76      1508.55 o
   6   13   11      1368.42       504.09      2025.00 o
   7   13   11      1763.91       307.84      1845.56 o
   8   13   11       676.78       188.89       433.89 o
  -8   14   11       863.61       355.96       922.94 o
  -7   14   11      5078.80       429.16      3913.75 o
  -6   14   11       975.20       233.19       814.53 o
  -5   14   11      5212.09       422.33      4621.28 o
  -4   14   11      1668.41       234.73      1491.50 o
  -3   14   11      1431.50       296.85      1710.65 o
  -2   14   11       253.29       100.77       263.41 o
  -1   14   11       208.38        72.03       228.61 o
   3   14   11      1330.49       350.20      1838.69 o
   4   14   11       959.15       378.33      1585.63 o
   5   14   11      4781.64       473.52      4540.06 o
   6   14   11       828.58       260.51       878.53 o
   7   14   11      3056.07      1044.37      3860.14 o
   8   14   11      1027.46       260.31       832.90 o
  -6   15   11       958.08       288.65      1059.50 o
  -5   15   11      1592.00       335.01      1748.91 o
  -4   15   11       918.04       253.36       945.56 o
  -3   15   11      7492.90       676.16      7187.65 o
  -2   15   11       819.69       217.73      1045.23 o
  -1   15   11      4207.50       321.42      4922.43 o
   1   15   11      4109.86       613.28      4929.44 o
   3   15   11      6795.07       570.16      6937.22 o
   5   15   11      1336.78       353.54      1743.90 o
   6   15   11      1368.42       283.87      1101.58 o
  -5   16   11       488.06       164.21       265.04 o
  -4   16   11      2332.52       543.45      2135.36 o
  -2   16   11       607.90       176.47       963.48 o
  -1   16   11       712.14       183.66       790.73 o
   4   16   11      1722.25       399.86      2229.73 o
  -2   17   11      1589.25       733.92      2066.61 o
  -1   17   11      1944.64       804.26      2900.90 o
   0   17   11      2687.44       483.44      2778.34 o
   1   17   11      1975.10       619.37      2846.22 o
   2   17   11      1478.76       485.64      1833.55 o
   0    0   12      9570.95       764.19      9658.96 o
   1    0   12      1241.66       180.67      1240.45 o
   2    0   12      6966.33       539.96      6231.52 o
   3    0   12      1661.39       284.73      1253.87 o
   4    0   12     24752.20      1223.53     23599.10 o
   5    0   12      2746.64       340.85      2717.54 o
   6    0   12      4154.10       472.41      3793.33 o
   7    0   12      3655.48       476.44      3143.84 o
   8    0   12      2233.87       229.32      2191.18 o
   9    0   12      1054.11       212.27      1385.33 o
  11    0   12      1509.35       364.97      1932.48 o
  13    0   12      1348.12       483.91      1689.21 o
 -12    1   12       786.53       359.97      1060.15 o
 -10    1   12       217.42        87.78       293.78 o
  -9    1   12      2995.50       380.44      3095.81 o
  -8    1   12      1791.48       231.58      1934.24 o
  -7    1   12      7915.72       698.04      7600.35 o
  -6    1   12      4949.66       476.93      4446.22 o
  -5    1   12      3376.01       767.77      3178.70 o
  -4    1   12      4136.38       411.65      3883.78 o
  -3    1   12      5891.23       390.90      5294.02 o
  -2    1   12       504.15       130.58       365.19 o
  -1    1   12       446.41       122.15       482.24 o
   0    1   12      2259.97       233.93      2090.32 o
   1    1   12       422.74       123.11       452.41 o
   2    1   12       561.32       130.44       408.85 o
   3    1   12      5339.56       389.75      5211.40 o
   4    1   12      4006.83       355.05      4177.04 o
   5    1   12      3302.43       587.32      3016.21 o
   6    1   12      4772.13       522.97      4675.82 o
   7    1   12      7534.66       462.98      7477.06 o
   8    1   12      1791.48       214.10      2099.47 o
   9    1   12      2216.02       438.99      2752.05 o
  10    1   12       315.89       105.20       374.42 o
  12    1   12       648.43       240.97      1207.56 o
 -13    2   12      1201.96       518.96      1600.00 o
 -12    2   12      1749.49       687.99      1840.41 o
  -9    2   12       565.40       138.28       595.36 o
  -8    2   12      4623.55       444.57      5135.16 o
  -6    2   12      4491.14       574.22      4332.27 o
  -5    2   12      9125.15       677.15      8040.71 o
  -4    2   12      3035.18       273.00      2988.81 o
  -3    2   12     11368.53       660.43     10434.62 o
  -2    2   12       547.54       144.94       467.42 o
  -1    2   12      8466.89       585.78      7570.74 o
   0    2   12      9958.58       669.63      9428.41 o
   1    2   12      7977.07       528.63      7264.15 o
   2    2   12       334.51       152.31       351.94 o
   3    2   12      9784.21       629.70      9118.34 o
   4    2   12      2922.49       284.62      2797.35 o
   5    2   12      8271.72       638.45      7869.46 o
   6    2   12      4392.52       465.25      4415.60 o
   7    2   12       738.08       143.97       796.37 o
   8    2   12      5115.66       411.02      4956.16 o
   9    2   12       878.84       191.78       781.76 o
  11    2   12       627.57       263.79      1119.57 o
  12    2   12       796.21       329.17      1600.00 o
  13    2   12      1364.60       326.69      1719.76 o
  14    2   12       602.82       248.39       591.46 o
 -10    3   12      8603.60       657.52      8994.63 o
  -9    3   12       676.78       136.97       850.31 o
  -8    3   12      8527.16       552.91      8341.17 o
  -7    3   12      1552.43       341.67      1383.84 o
  -6    3   12      1268.48       285.56      1109.56 o
  -5    3   12      1552.43       359.30      1511.65 o
  -4    3   12      3775.04       323.48      3391.90 o
  -3    3   12       914.91       157.17       803.72 o
  -2    3   12     13870.38       774.07     12968.65 o
  -1    3   12      2591.98       252.28      2262.90 o
   0    3   12       504.15       139.85       587.09 o
   1    3   12      2874.33       282.27      2564.41 o
   2    3   12     13789.44       848.58     12973.21 o
   3    3   12      1024.16       207.03       876.16 o
   4    3   12      4171.86       508.98      3824.19 o
   5    3   12      1678.26       253.75      1581.65 o
   6    3   12      1161.74       222.85      1073.87 o
   7    3   12      1321.72       196.41      1443.24 o
   8    3   12      8193.66       707.07      8143.26 o
   9    3   12       714.90       171.13       888.04 o
  10    3   12      9716.26       502.01      9181.47 o
  11    3   12       545.93       133.47       536.85 o
  12    3   12      1418.51       460.09      2289.62 o
 -13    4   12       940.06       373.49       972.19 o
 -12    4   12      1378.62       627.34      1643.49 o
 -11    4   12      2061.67       414.05      1920.19 o
 -10    4   12       725.98       267.03       856.15 o
  -9    4   12       562.13       110.14       868.48 o
  -8    4   12      1822.19       180.68      1990.05 o
  -7    4   12      1517.38       324.39      1413.76 o
  -6    4   12      2317.59       352.86      2435.42 o
  -5    4   12      2269.80       339.36      2061.16 o
  -4    4   12       637.09       140.71       457.96 o
  -3    4   12      5718.20       523.03      5402.25 o
  -2    4   12      8860.84       505.32      8471.36 o
  -1    4   12     13201.83       687.97     12669.75 o
   0    4   12     14567.89       764.22     14144.34 o
   1    4   12     12046.10       755.36     11672.64 o
   2    4   12      9020.27       604.62      8567.35 o
   3    4   12      5486.40       412.91      5449.39 o
   5    4   12      1735.13       437.19      1629.74 o
   6    4   12      2047.64       281.84      2138.14 o
   7    4   12      1732.26       246.34      1604.00 o
   8    4   12      1510.68       191.26      1946.57 o
   9    4   12       788.46       194.22      1027.20 o
  10    4   12       707.56       195.88       766.74 o
  11    4   12      1346.86       294.25      1715.62 o
  12    4   12      1079.96       373.18      1819.88 o
  13    4   12       812.80       192.29      1076.50 o
 -13    5   12      1311.73       578.28      1390.54 o
 -12    5   12       747.46       230.49       729.54 o
 -11    5   12      2991.73       935.44      3362.84 o
 -10    5   12       502.61       165.86       306.95 o
  -9    5   12      8479.56       687.62      7177.48 o
  -8    5   12       625.85        92.97      1085.04 o
  -7    5   12      6817.78       670.55      5932.08 o
  -6    5   12      5032.32       580.98      4824.69 o
  -5    5   12      5342.08       485.41      4454.23 o
  -4    5   12      3529.67       282.13      3457.44 o
  -3    5   12      8870.56       609.30      8308.32 o
  -2    5   12      4990.90       403.55      4926.64 o
  -1    5   12       544.33       137.29       581.29 o
   0    5   12     15453.15       889.76     14500.98 o
   1    5   12       429.85       134.13       390.06 o
   2    5   12      5227.01       395.57      5189.76 o
   3    5   12      7669.67       617.79      7447.69 o
   4    5   12      3576.85       415.72      3554.54 o
   5    5   12      4779.27       511.47      4548.15 o
   6    5   12      5034.76       434.62      4869.25 o
   7    5   12      6147.51       420.90      6146.56 o
   8    5   12       974.13       113.85      1159.40 o
   9    5   12      7362.41       413.37      7365.07 o
  11    5   12      1851.69       541.96      3373.29 o
  12    5   12       816.73       198.65       813.39 o
  13    5   12      1056.34       255.00      1416.02 o
 -13    6   12      1191.25       369.37      1069.29 o
 -10    6   12       765.44       290.37       915.06 o
  -9    6   12       468.49       153.43       355.32 o
  -8    6   12       447.87       160.21       344.10 o
  -7    6   12      2562.28       358.82      2437.40 o
  -6    6   12      1275.84       259.35      1385.33 o
  -5    6   12      2894.66       385.09      3065.84 o
  -4    6   12      8051.00       444.62      7668.50 o
  -3    6   12      4081.23       360.53      3803.19 o
  -2    6   12      9757.00       598.23      9457.56 o
  -1    6   12      2004.27       301.95      2117.84 o
   0    6   12       703.90       136.95       529.00 o
   1    6   12      2723.24       238.83      2743.66 o
   2    6   12      9360.04       529.34      9125.98 o
   3    6   12      3732.87       353.21      3548.58 o
   4    6   12      7603.52       729.15      7470.14 o
   5    6   12      1932.52       605.09      2885.84 o
   6    6   12       947.46       174.77      1178.55 o
   7    6   12      2297.75       227.63      2115.08 o
   8    6   12       501.07        96.28       433.06 o
   9    6   12       289.56       118.28       380.64 o
  10    6   12       684.86       132.38       923.55 o
  13    6   12      1067.56       292.33      1008.06 o
 -12    7   12      1418.51       479.53      1567.37 o
 -10    7   12       877.82       206.97       915.06 o
  -9    7   12      1816.32       262.51      1483.79 o
  -8    7   12      4094.43       413.96      3458.62 o
  -7    7   12      3396.03       653.74      3547.39 o
  -6    7   12     10550.91      1215.92     12383.24 o
  -5    7   12      3470.63       269.62      3579.63 o
  -4    7   12      4708.16       259.73      4950.53 o
  -3    7   12      1431.50       182.27      1632.16 o
  -2    7   12      1929.49       210.11      1580.86 o
   0    7   12      2802.83       244.12      2664.62 o
   1    7   12       257.69        81.76       342.25 o
   2    7   12      1353.18       175.95      1411.50 o
   3    7   12      1484.05       224.03      1435.65 o
   4    7   12      4518.85       416.38      4505.09 o
   5    7   12      3075.12       316.77      3372.12 o
   6    7   12     12930.43       641.73     12476.89 o
   7    7   12      3768.70       295.75      3998.03 o
   8    7   12      2703.52       488.46      3352.41 o
   9    7   12      1013.18       162.11      1341.02 o
  10    7   12       465.52       178.93      1049.11 o
  11    7   12       441.34       136.63       720.39 o
  -9    8   12       318.35       130.16        87.42 o
  -8    8   12      2515.47       393.50      2410.81 o
  -7    8   12      1850.21       266.43      1384.58 o
  -6    8   12       996.81       123.85      1482.25 o
  -5    8   12      3073.21       255.62      3478.64 o
  -4    8   12      2942.99       207.21      2850.49 o
  -3    8   12      7380.14       390.22      7270.97 o
  -2    8   12       197.60        81.26       219.63 o
  -1    8   12      9672.21       524.56      9438.12 o
   0    8   12      2182.13       204.15      1999.88 o
   1    8   12      9105.44       535.23      8977.56 o
   2    8   12       345.93       147.21       299.64 o
   3    8   12      6470.00       498.22      6573.97 o
   4    8   12      3090.40       263.99      3175.32 o
   5    8   12      2961.69       258.43      3365.16 o
   6    8   12      1447.17       192.43      1395.77 o
   7    8   12      1200.77       284.99      1343.22 o
   8    8   12      1743.74       433.96      2651.22 o
 -11    9   12      2063.24       539.26      1962.49 o
 -10    9   12      6497.71       593.60      5371.42 o
  -8    9   12      3661.73       343.58      3200.16 o
  -7    9   12      3562.46       347.11      2934.39 o
  -6    9   12      1835.44       748.92      2598.96 o
  -5    9   12      3730.77       464.51      3348.94 o
  -4    9   12      3819.57       242.44      4029.71 o
  -3    9   12       604.51       144.68       579.36 o
  -2    9   12      1857.62       170.56      1951.87 o
  -1    9   12       872.73       141.30      1244.68 o
   0    9   12       532.35       111.15       448.59 o
   1    9   12      1601.62       228.61      1624.90 o
   2    9   12      2154.89       338.65      2395.12 o
   3    9   12       734.35       138.94       589.52 o
   4    9   12      4147.45       339.06      4158.96 o
   5    9   12      3157.72       286.19      3450.39 o
   6    9   12      2474.22       201.98      2737.38 o
   7    9   12      2256.70       194.53      2796.29 o
   8    9   12      2050.75       405.16      2865.46 o
  10    9   12      5425.40      1328.15      5468.60 o
  11    9   12      1664.20       663.99      1985.59 o
 -11   10   12       629.30       241.71       507.60 o
 -10   10   12      1667.00       526.87      1574.50 o
  -9   10   12      1488.03       526.98      1500.79 o
  -8   10   12      1388.86       285.98      1108.89 o
  -7   10   12      1081.09       230.81      1104.90 o
  -6   10   12      2315.93       296.43      2122.44 o
  -5   10   12       116.38        49.00       267.98 o
  -4   10   12       522.87        89.70       541.03 o
  -3   10   12      1296.82       147.46      1461.53 o
  -2   10   12      5793.91       361.46      5786.64 o
  -1   10   12      2409.60       211.15      2560.36 o
   0   10   12     14398.10       652.39     14657.94 o
   1   10   12      2251.80       293.93      2454.21 o
   2   10   12      6163.71       399.84      6077.76 o
   3   10   12      1079.96       218.25      1340.29 o
   4   10   12       561.32       104.36       717.70 o
   6   10   12      1654.38       320.52      2279.11 o
   7   10   12       933.74       388.01      1157.36 o
   8   10   12       592.73       266.41       903.00 o
  10   10   12      1255.03       470.56      1421.29 o
 -10   11   12       565.40       226.65       658.44 o
  -9   11   12      3716.07      1690.74      4219.80 o
  -8   11   12      1713.69       292.03      1592.01 o
  -7   11   12      4063.66       447.50      3490.45 o
  -5   11   12      4263.49       408.94      3837.80 o
  -4   11   12       494.92        83.44       456.68 o
  -3   11   12      3223.81       293.07      3452.74 o
  -2   11   12      2503.40       208.33      2971.34 o
  -1   11   12      1716.54       181.06      1845.56 o
   0   11   12      3003.03       252.69      3422.25 o
   1   11   12      1350.65       187.17      1661.38 o
   2   11   12      2534.49       266.79      3128.16 o
   3   11   12      3103.81       323.99      3482.18 o
   4   11   12       422.04       115.23       557.43 o
   5   11   12      3208.20       578.88      3897.50 o
   7   11   12      3928.80       547.85      3591.60 o
   8   11   12      1303.02       414.88      1678.54 o
  -8   12   12       935.85       346.34      1206.87 o
  -7   12   12      1484.05       306.22      1306.10 o
  -6   12   12       648.43       192.78       648.21 o
  -5   12   12      1391.43       236.18      1407.75 o
  -4   12   12      2071.06       504.26      3435.13 o
  -3   12   12       752.17        91.54      1122.25 o
  -2   12   12      2232.25       180.47      2503.00 o
  -1   12   12      5757.30       420.37      6358.47 o
   1   12   12      5997.35       466.36      6313.89 o
   2   12   12      1870.99       348.30      2502.00 o
   3   12   12       508.02       113.24      1058.20 o
   4   12   12      3165.46       344.62      3359.36 o
   5   12   12      1173.50       458.56      1650.80 o
   6   12   12       481.24       197.78       583.71 o
   7   12   12      1146.55       376.36      1259.54 o
   8   12   12      1049.64       298.78      1029.77 o
  -8   13   12      3864.36       489.86      3537.87 o
  -6   13   12      6288.61       567.60      5449.39 o
  -5   13   12      1301.78       254.52      1193.70 o
  -4   13   12      3318.27       434.11      3933.80 o
  -3   13   12      1597.50       193.93      2162.25 o
  -2   13   12       158.19        72.71       112.78 o
  -1   13   12      1240.44       249.66      1600.00 o
   0   13   12       381.36       104.83       515.74 o
   1   13   12       852.52       367.73      1570.54 o
   3   13   12      1194.82       454.38      2258.15 o
   4   13   12      2571.00       942.20      3739.32 o
   5   13   12      1193.63       397.08      1330.06 o
   6   13   12      5862.21       666.58      5641.51 o
   8   13   12      3751.81       524.83      3705.16 o
  -7   14   12       467.75       180.85       355.32 o
  -6   14   12      1766.80       517.82      1780.84 o
  -4   14   12      2710.69       318.90      2529.08 o
  -3   14   12      4415.36       541.92      4774.81 o
  -2   14   12       544.33       235.23      1067.98 o
  -1   14   12       739.02       158.09      1280.21 o
   0   14   12       547.54       226.26      1173.06 o
   3   14   12      4276.98      1131.98      4961.79 o
   4   14   12      1668.41       677.48      2457.18 o
   5   14   12      2915.06       373.44      2854.76 o
   6   14   12      1689.56       391.80      1576.88 o
  -4   15   12      1782.75       306.57      1983.81 o
  -2   15   12      1164.09       393.31      2545.20 o
  -1   15   12       309.20       131.91       456.68 o
   1   15   12       419.92       191.10       384.16 o
   5   15   12      2116.72       715.60      2662.56 o
   6   15   12       529.18       240.64       488.41 o
   1    0   13      7350.61       660.86      6398.40 o
   2    0   13      1177.04       217.23       910.23 o
   3    0   13     27658.90      1447.90     25969.32 o
   5    0   13     11449.39      1075.16     10532.92 o
   9    0   13       436.29       163.16       444.79 o
  10    0   13       456.65       110.30       528.08 o
  13    0   13      1494.68       683.81      1853.30 o
 -13    1   13      1623.73       696.08      2400.02 o
 -12    1   13      1869.50       796.01      2276.24 o
 -10    1   13      4092.23       931.15      4536.02 o
  -9    1   13       401.10       119.92       487.53 o
  -8    1   13      5476.21       600.97      5706.29 o
  -7    1   13      2503.40       368.45      2391.21 o
  -6    1   13      4544.33       635.60      4151.22 o
  -5    1   13      3507.22       503.36      3891.26 o
  -4    1   13      2148.51       339.74      2000.77 o
  -3    1   13       409.41       160.84       189.61 o
  -2    1   13      1484.05       220.06      1434.14 o
  -1    1   13      1151.21       192.65      1139.74 o
   0    1   13       545.13       143.82       530.84 o
   1    1   13      1200.77       193.17      1231.31 o
   2    1   13      1668.41       238.95      1638.63 o
   4    1   13      1924.96       249.11      1654.86 o
   5    1   13      4000.30       480.99      3870.08 o
   6    1   13      4542.01       598.34      4006.89 o
   7    1   13      2472.50       362.75      2335.79 o
   8    1   13      5440.62       439.11      5741.09 o
   9    1   13       275.67       114.84       374.42 o
  10    1   13      3533.76       691.41      4234.10 o
  11    1   13       281.42       101.60       391.25 o
  12    1   13      1331.75       561.33      2664.62 o
  13    1   13      1524.09       531.99      2274.34 o
 -12    2   13       741.83       313.04       782.88 o
 -10    2   13       496.46       108.11       476.11 o
  -9    2   13       291.32        85.16       456.68 o
  -6    2   13      5604.28       561.59      5162.42 o
  -5    2   13       589.38       227.23       679.12 o
  -4    2   13     10650.11       660.53      9666.82 o
  -3    2   13       389.46       144.65       359.10 o
  -2    2   13     13376.37       847.71     12119.81 o
  -1    2   13      5791.29       505.41      5434.64 o
   0    2   13     10434.59       657.32      9712.10 o
   1    2   13      5841.15       460.24      5312.95 o
   2    2   13     13221.61       791.36     12283.29 o
   3    2   13       718.58       146.67       516.65 o
   4    2   13     10006.71       688.46      8998.42 o
   5    2   13       806.93       233.62       897.00 o
   6    2   13      5650.74       532.87      5036.74 o
   7    2   13       396.29       124.67       411.28 o
   9    2   13       279.11       114.40       414.53 o
  10    2   13       285.47       127.91       373.26 o
  11    2   13      1177.04       273.90      1518.66 o
  13    2   13      1369.69       496.68      1959.83 o
 -11    3   13      5867.48      1020.09      5208.51 o
  -9    3   13     10586.29       913.47     10724.67 o
  -8    3   13       948.52       184.41      1200.62 o
  -7    3   13      6013.35       587.06      5039.58 o
  -5    3   13      3521.50       569.73      3031.60 o
  -4    3   13      6428.55       452.48      5768.40 o
  -3    3   13      7748.23       499.79      7093.01 o
  -2    3   13      4039.57       363.06      3482.18 o
  -1    3   13      3686.76       378.18      3673.57 o
   1    3   13      4274.73       420.72      4048.78 o
   2    3   13      3991.60       417.42      3639.71 o
   3    3   13      7486.94       556.79      7160.54 o
   4    3   13      5578.54       534.59      5516.03 o
   5    3   13      3448.37       396.06      3183.22 o
   7    3   13      5251.92       453.87      5212.84 o
   8    3   13       882.93       183.03      1150.57 o
   9    3   13     11160.36       596.19     10530.86 o
  11    3   13      5783.43       408.24      5221.51 o
 -12    4   13       558.06       220.30       746.38 o
 -11    4   13      1833.97       478.94      1982.03 o
 -10    4   13       412.20       173.26       390.85 o
  -8    4   13       514.25       173.24       644.14 o
  -7    4   13      4819.79       676.08      4197.74 o
  -6    4   13      5705.19       634.20      4973.07 o
  -5    4   13      1457.66       331.08      1694.97 o
  -4    4   13      1674.04       221.05      1394.28 o
  -3    4   13      2158.09       270.16      1656.49 o
  -2    4   13     11073.28       749.56      9892.29 o
  -1    4   13     11974.45       726.75     11265.70 o
   0    4   13      7131.00       482.37      6627.59 o
   1    4   13     12331.03       687.82     11397.70 o
   2    4   13     10643.01       706.46      9684.53 o
   3    4   13      1888.90       333.51      1837.84 o
   4    4   13      2010.44       299.33      1914.94 o
   5    4   13      1897.88       301.32      1824.14 o
   6    4   13      5624.90       565.20      5077.99 o
   7    4   13      4105.45       392.47      4182.21 o
   8    4   13       328.87       137.29       702.78 o
  10    4   13       277.39       123.79       456.68 o
  11    4   13      1364.60       456.35      1974.02 o
  12    4   13       335.77       151.33       771.17 o
  13    4   13       665.19       183.71      1044.58 o
 -12    5   13      3386.01       997.18      3284.44 o
 -10    5   13      6026.70       528.94      5129.42 o
  -8    5   13      5807.01       542.81      7172.40 o
  -7    5   13      1856.14       326.16      1556.30 o
  -6    5   13      6863.31       789.67      6071.53 o
  -5    5   13      3546.05       530.73      3910.00 o
  -4    5   13      6544.95       445.42      6021.76 o
  -3    5   13      5003.07       418.65      4636.25 o
  -2    5   13      3231.63       307.12      3070.27 o
  -1    5   13      4360.65       338.58      4037.33 o
   0    5   13       907.64       175.20       768.95 o
   1    5   13      3849.40       392.84      3728.32 o
   2    5   13      2716.06       319.22      2630.66 o
   3    5   13      4461.21       425.21      4044.96 o
   4    5   13      5671.45       691.93      5619.00 o
   5    5   13      4074.64       406.37      4183.50 o
   6    5   13      6519.92       566.83      6286.90 o
   7    5   13      1612.66       295.72      1506.99 o
   8    5   13      8026.32       521.01      7260.74 o
  10    5   13      4724.71       790.01      5298.38 o
  12    5   13      2107.23       723.47      3269.55 o
 -12    6   13       455.92       193.24       327.25 o
 -10    6   13      1794.39       408.15      1683.46 o
  -8    6   13       512.69       165.18       450.71 o
  -6    6   13       572.79       186.95       480.05 o
  -5    6   13      7142.63       689.25      6460.94 o
  -4    6   13      2997.38       303.32      2999.75 o
  -3    6   13      8122.17       573.73      7638.76 o
  -2    6   13      3035.18       291.95      2894.44 o
  -1    6   13      3204.30       368.15      3169.69 o
   0    6   13      4410.79       383.94      3785.94 o
   1    6   13      3296.50       327.97      3183.22 o
   2    6   13      2950.47       315.89      2652.25 o
   3    6   13      8485.90       710.06      8497.15 o
   4    6   13      2762.89       397.93      3065.84 o
   5    6   13      6425.79       639.96      6401.60 o
   6    6   13       396.29       122.62       541.49 o
   8    6   13       277.39        93.99       470.46 o
   9    6   13       359.50        97.87       324.72 o
  10    6   13       683.96       285.28      1754.77 o
  11    6   13       454.45       153.32       639.08 o
  12    6   13       326.38       123.09       408.85 o
 -12    7   13      2030.54       424.87      1741.39 o
 -11    7   13      1435.41       444.57      1428.08 o
 -10    7   13       760.69       323.64       866.71 o
  -9    7   13      1191.25       393.12      1344.69 o
  -8    7   13      2024.35       724.58      2320.35 o
  -7    7   13     11530.54       927.47      9932.12 o
  -6    7   13      1386.30       142.22      1924.58 o
  -5    7   13      4658.71       516.72      4971.66 o
  -4    7   13      1807.54       296.99      2337.72 o
  -3    7   13      2739.43       309.78      2402.96 o
  -2    7   13      1534.86       199.52      1554.72 o
  -1    7   13       358.20       151.10       318.98 o
   0    7   13      3398.04       385.14      3241.02 o
   2    7   13      1469.51       222.93      1546.06 o
   3    7   13      2261.61       317.48      2327.10 o
   4    7   13      2132.58       232.01      2439.37 o
   5    7   13      4826.96       377.74      4600.91 o
   6    7   13      1567.38       213.89      1674.45 o
   7    7   13     10148.34       727.98      9918.17 o
   8    7   13      1298.06       358.30      2016.01 o
  10    7   13       475.22       124.52       725.22 o
  -9    8   13      1042.97       324.50      1140.41 o
  -8    8   13       465.52       158.88       449.02 o
  -7    8   13       513.47       150.49       674.44 o
  -6    8   13       881.91       284.09      1051.70 o
  -5    8   13       450.79       102.29       664.61 o
  -4    8   13      6217.86       423.30      6583.70 o
  -3    8   13      1049.64       146.05      1239.04 o
  -2    8   13      8712.46       475.37      8671.33 o
  -1    8   13      1186.50       195.58      1423.55 o
   0    8   13     10975.73       566.00     11079.67 o
   1    8   13      1301.78       160.16      1285.94 o
   2    8   13      8654.74       630.66      8593.29 o
   3    8   13       860.58       259.44       948.64 o
   4    8   13      5655.92       434.77      6035.74 o
   5    8   13       672.31       140.97       750.76 o
   6    8   13       970.91       220.88      1081.09 o
   9    8   13       442.79       157.13       922.34 o
 -11    9   13      1978.16       858.61      2176.22 o
 -10    9   13       671.42       255.01       741.47 o
  -9    9   13      5032.32      1059.44      4647.15 o
  -8    9   13      1848.73       673.21      2138.14 o
  -7    9   13      2317.59       467.16      2360.99 o
  -6    9   13      5591.40       545.50      5059.48 o
  -5    9   13      1501.34       210.67      2095.81 o
  -4    9   13       607.05        90.72       619.51 o
  -3    9   13      5132.90       389.53      5224.40 o
  -2    9   13       909.71       124.55      1038.13 o
   0    9   13       993.56       172.46      1098.92 o
   1    9   13       473.72       116.09       529.46 o
   2    9   13       793.30       204.50      1046.52 o
   3    9   13      4731.81       395.30      5575.61 o
   5    9   13      1627.90       226.31      1728.90 o
   6    9   13      4493.44       375.99      5209.95 o
   7    9   13      1338.04       407.83      2517.03 o
  -8   10   13       742.77       198.82       695.90 o
  -7   10   13      3464.56      1182.87      3702.72 o
  -6   10   13      1247.73       318.46      1576.09 o
  -5   10   13      1426.30       291.11      1202.70 o
  -4   10   13       317.12       112.14       329.79 o
  -3   10   13      1206.74       241.47      1357.19 o
  -1   10   13      9520.52       527.15      9852.55 o
   0   10   13       373.34       106.38       607.62 o
   1   10   13      9890.02       588.61      9866.45 o
   3   10   13      1146.55       226.05      1285.22 o
   4   10   13       369.36       101.85       320.41 o
   5   10   13      1305.51       233.75      1195.08 o
   6   10   13      1612.66       295.72      1746.40 o
   7   10   13      3868.64       487.99      3654.20 o
  -9   11   13      1298.06       427.73      1345.42 o
  -8   11   13      6112.49      1320.96      5535.36 o
  -6   11   13      2976.69       942.48      3477.46 o
  -4   11   13      4410.79       571.35      4491.68 o
  -3   11   13       994.64       112.87      1053.65 o
  -2   11   13       725.05       143.62       969.08 o
  -1   11   13       651.06       121.17       694.32 o
   1   11   13       524.44       167.85       452.84 o
   2   11   13       766.40       134.32       970.95 o
   3   11   13       653.70       165.40       829.44 o
   4   11   13      3930.95       427.18      4497.04 o
   6   11   13      2841.22      1093.20      3590.41 o
   8   11   13      5453.32       947.85      5394.90 o
  -6   12   13       768.30       265.16       751.86 o
  -5   12   13      1636.24       487.18      2625.54 o
  -3   12   13      1825.13       313.13      2794.18 o
  -2   12   13      1959.84       652.01      3495.17 o
  -1   12   13       708.47       131.89      1009.97 o
   0   12   13      6603.55       422.25      7373.66 o
   1   12   13       584.38       204.64       878.53 o
   2   12   13      2499.96       268.41      3448.04 o
   3   12   13      1934.03       450.97      2813.24 o
   5   12   13      1851.69       707.80      2591.83 o
   6   12   13       692.99       227.37       832.32 o
   7   12   13       458.86       213.03       574.56 o
  -7   13   13      5207.13       521.46      4367.89 o
  -5   13   13      6783.72       561.18      6091.80 o
   0   13   13       403.17       154.77       794.11 o
   3   13   13       358.85       154.49       333.79 o
   5   13   13      6280.43       788.12      6217.32 o
   7   13   13      4760.25       764.49      4209.41 o
  -6   14   13       589.38       224.72       673.40 o
  -4   14   13      4310.80       456.38      3957.67 o
  -2   14   13      2664.30       728.24      4039.87 o
  -1   14   13       544.33       124.44      1018.25 o
   0   14   13       825.61       355.95      2752.05 o
   4   14   13      3214.05      1281.72      3974.04 o
   6   14   13       777.87       324.39       624.00 o
  -3   15   13      1018.66       399.78      1351.30 o
   1   15   13       655.46       303.94      1078.47 o
   0    0   14      5010.37       596.76      4576.52 o
   1    0   14       575.26       158.47       528.08 o
   2    0   14       799.13       193.58       624.50 o
   3    0   14      5110.74       462.49      4626.72 o
   4    0   14      5540.06       450.79      4677.19 o
   5    0   14      1315.47       285.81      1401.75 o
   7    0   14      3636.78       541.63      3409.39 o
 -10    1   14       311.63        94.16       252.17 o
  -9    1   14       904.53       188.36       904.20 o
  -8    1   14       680.36       206.44       764.52 o
  -7    1   14      3212.10       507.07      2958.27 o
  -6    1   14      2606.01       393.49      2420.64 o
  -5    1   14      1461.60       376.25      1535.86 o
  -4    1   14      2537.95       381.39      2233.51 o
  -3    1   14      2817.42       348.87      2792.07 o
  -2    1   14      4767.38       494.20      4156.38 o
  -1    1   14      5878.03       551.39      5178.24 o
   0    1   14     11816.82       793.02     10569.90 o
   1    1   14      5552.87       551.31      5016.89 o
   2    1   14      4442.84       401.39      3665.09 o
   3    1   14      2748.44       315.71      2819.61 o
   4    1   14      2759.27       307.29      2419.66 o
   5    1   14      1303.02       386.31      1413.01 o
   6    1   14      2365.88       381.62      2084.84 o
   8    1   14       478.98       191.29       729.54 o
   9    1   14       606.21       190.63       782.32 o
  11    1   14      1160.57       379.82      1917.56 o
  -8    2   14      5022.56      1029.14      5285.29 o
  -7    2   14      3171.27       410.82      2679.10 o
  -6    2   14      4143.02       591.38      3805.66 o
  -5    2   14      3138.41       431.82      3189.99 o
  -4    2   14      2339.18       297.91      2061.16 o
  -3    2   14      2077.33       287.01      2021.40 o
  -2    2   14      2414.67       306.06      2598.96 o
  -1    2   14      2802.83       320.64      2730.06 o
   0    2   14      4475.01       428.16      4069.16 o
   1    2   14      3338.13       355.88      3006.33 o
   2    2   14      2342.51       309.78      2543.18 o
   3    2   14      2263.25       368.34      2127.98 o
   4    2   14      2435.00       293.76      2202.42 o
   5    2   14      3241.42       417.30      3234.20 o
   6    2   14      4140.80       569.08      3615.62 o
   8    2   14      4891.73       977.14      5043.84 o
  10    2   14      3649.24       698.46      3940.07 o
  12    2   14      1944.64       676.79      2219.35 o
 -10    3   14      2151.70       964.11      3016.21 o
  -9    3   14      1069.81       126.06      1162.13 o
  -8    3   14      2843.05       715.58      3853.93 o
  -5    3   14      6310.46       844.68      5858.37 o
  -4    3   14       930.59       194.20       881.50 o
  -3    3   14     11921.79       789.02     11210.57 o
  -2    3   14      5499.15       426.15      4921.02 o
  -1    3   14      4983.61       408.11      4552.20 o
   0    3   14      1430.20       264.18      1386.07 o
   1    3   14      4544.33       436.11      4038.60 o
   2    3   14      4826.96       435.12      4762.38 o
   3    3   14     13564.08       849.63     12214.67 o
   4    3   14       860.58       304.86       955.43 o
   5    3   14      6687.70       616.29      6307.54 o
   8    3   14      3063.68      1015.20      3810.59 o
   9    3   14       576.09       174.27      1209.65 o
  10    3   14      1908.39       461.50      3027.20 o
  12    3   14       501.07       183.33       496.40 o
 -11    4   14       765.44       292.28       964.10 o
 -10    4   14      1376.06       430.18      1296.00 o
  -9    4   14      1353.18       435.45      1905.32 o
  -8    4   14      2104.08       416.71      2906.29 o
  -7    4   14      3952.56      1700.44      4361.28 o
  -6    4   14      2635.96       446.98      2138.14 o
  -5    4   14      7660.64       536.11      6725.64 o
  -4    4   14       600.29       161.03       462.68 o
  -3    4   14      3004.92       350.86      2767.81 o
  -2    4   14      2574.49       312.54      2379.49 o
  -1    4   14      3308.37       419.61      3052.56 o
   0    4   14      3862.22       436.26      3579.63 o
   1    4   14      2841.22       398.03      2700.88 o
   2    4   14      2474.22       290.98      2443.32 o
   3    4   14      2894.66       320.29      2725.88 o
   4    4   14       538.72       205.27       457.53 o
   5    4   14      7448.29       887.97      6746.98 o
   6    4   14      2061.67       349.99      2029.50 o
   7    4   14      3747.60       990.09      4120.36 o
   8    4   14      1316.72       530.69      2597.94 o
   9    4   14      1078.83       274.65      1656.49 o
  11    4   14       644.93       249.06       945.56 o
  12    4   14       997.90       453.29      1791.83 o
 -12    5   14       757.85       292.72       725.22 o
 -11    5   14       662.53       232.95       747.48 o
  -9    5   14      2762.89       519.12      2781.51 o
  -7    5   14      2104.08       762.39      2109.56 o
  -6    5   14      5286.89       598.00      4747.21 o
  -5    5   14      1401.71       237.05      1383.10 o
  -4    5   14      5108.28       405.81      4482.30 o
  -3    5   14      2256.70       264.82      2192.11 o
  -2    5   14     10189.98       861.47      9602.04 o
  -1    5   14      2583.23       325.31      2493.00 o
   0    5   14      5054.31       413.45      4573.82 o
   1    5   14      2641.26       316.56      2566.44 o
   2    5   14     10217.79       998.30      9537.48 o
   3    5   14      1725.11       277.27      1779.15 o
   4    5   14      5086.16       508.00      4674.46 o
   5    5   14       970.91       272.35       975.94 o
   6    5   14      5059.20       626.59      4890.20 o
   7    5   14      2078.90       387.54      2235.40 o
   9    5   14      1735.13       465.85      2904.13 o
  11    5   14       366.72       144.31       780.64 o
 -11    6   14      2935.53       637.63      3254.70 o
  -9    6   14      6434.07       687.29      5568.14 o
  -7    6   14      3044.66       417.73      2573.53 o
  -6    6   14      1322.97       306.65      1097.60 o
  -5    6   14      2185.35       397.34      1810.50 o
  -4    6   14      3044.66       772.80      3372.12 o
  -3    6   14      6874.72       576.34      6358.47 o
  -2    6   14      2369.23       319.92      2347.40 o
  -1    6   14      4944.82       476.70      4932.25 o
   0    6   14       429.14       137.58       366.72 o
   1    6   14      5076.35       433.96      5301.30 o
   2    6   14      2703.52       352.48      2571.50 o
   3    6   14      6381.73       764.21      6234.68 o
   4    6   14      3117.24       374.65      3237.61 o
   5    6   14      2080.47       312.34      1887.03 o
   6    6   14       923.26       301.13      1192.32 o
   7    6   14      1596.12       565.03      2680.13 o
   9    6   14      3640.93       928.14      5182.56 o
  11    6   14      1601.62       473.74      3330.44 o
 -11    7   14       703.90       240.11       870.25 o
  -8    7   14       566.22       230.09       649.23 o
  -7    7   14      3562.46       445.69      3340.84 o
  -6    7   14      5867.48      1059.63      6753.55 o
  -5    7   14      3396.03       507.35      4143.50 o
  -4    7   14      1129.13       271.73      1246.80 o
  -3    7   14      1811.93       350.08      1941.28 o
  -2    7   14      1826.60       405.91      2045.75 o
  -1    7   14      7924.91       517.71      7541.19 o
   0    7   14       830.56       202.31       670.81 o
   1    7   14      7427.51       557.55      7305.12 o
   2    7   14      2246.90       257.72      2245.81 o
   3    7   14      1386.30       588.09      1588.82 o
   4    7   14      1134.92       210.99      1211.04 o
   5    7   14      4387.96       392.07      4342.81 o
   6    7   14      6851.92       518.42      6887.34 o
   8    7   14       449.33       144.43       824.26 o
 -10    8   14      2349.17       845.60      2809.00 o
  -8    8   14      4059.28       795.85      3707.59 o
  -6    8   14      3939.59       477.33      3677.21 o
  -5    8   14       717.66       227.70       688.01 o
  -4    8   14      2261.61       240.56      2717.54 o
  -3    8   14      2725.04       590.99      3103.60 o
  -2    8   14      1102.70       153.12       999.82 o
  -1    8   14      3342.10       264.58      3379.10 o
   0    8   14       468.49       133.32       749.66 o
   1    8   14      2889.11       492.00      3594.00 o
   2    8   14      1157.06       277.41      1301.77 o
   3    8   14      3444.33       383.71      3016.21 o
   4    8   14      2963.56       312.84      2810.06 o
   5    8   14       690.27       209.75       736.04 o
   6    8   14      2271.44       890.53      3573.65 o
   8    8   14      2131.00       552.80      3443.34 o
 -10    9   14      2238.76       529.16      2129.82 o
  -8    9   14       871.72       341.37      1010.60 o
  -7    9   14      1478.76       289.80      1416.02 o
  -5    9   14      2639.50       740.76      3189.99 o
  -4    9   14      1193.63       236.59      1163.49 o
  -3    9   14      4169.64       311.08      4567.06 o
  -2    9   14      1324.23       269.23      1868.83 o
  -1    9   14      3690.94       357.49      3589.21 o
   0    9   14      3276.78       587.00      3478.64 o
   1    9   14      3035.18       654.05      3695.42 o
   2    9   14      1348.12       357.56      1631.35 o
   3    9   14      4741.28       421.76      4873.44 o
   4    9   14      1409.45       205.41      1316.24 o
   5    9   14      2782.82       537.32      3316.61 o
   6    9   14       446.41       194.85      1027.20 o
  -9   10   14      1118.75       348.75      1575.30 o
  -8   10   14       480.49       183.29       416.16 o
  -7   10   14      4022.09      1442.54      4721.06 o
  -5   10   14      5791.29       578.74      4853.91 o
  -4   10   14       333.88        95.57       674.44 o
  -3   10   14      1137.24       164.78      1173.75 o
  -2   10   14      1403.00       255.21      1723.91 o
  -1   10   14       343.38       114.78       234.40 o
   0   10   14      3450.39       650.86      3524.80 o
   1   10   14       287.80       118.51       310.11 o
   2   10   14      1268.48       329.68      1703.21 o
   3   10   14      1095.85       170.87      1192.32 o
   4   10   14       338.30       151.27       520.30 o
   5   10   14      4831.75       389.89      5331.92 o
   6   10   14      1425.00       570.26      1856.75 o
   7   10   14      4103.24      1684.06      4580.58 o
  -7   11   14       544.33       186.26       568.35 o
  -6   11   14       676.78       204.11       441.00 o
  -4   11   14      1253.81       188.86      1648.36 o
  -3   11   14       750.29       168.72      1003.62 o
  -2   11   14      1782.75       392.29      2778.34 o
  -1   11   14       447.87       120.16       534.07 o
   0   11   14       661.64       165.52       781.76 o
   1   11   14       429.85       128.42       479.17 o
   2   11   14      2061.67       432.80      2697.76 o
   3   11   14       841.50       190.66      1018.25 o
   4   11   14      1441.94       321.45      1991.84 o
   8   11   14       596.08       273.89       177.69 o
  -7   12   14      1430.20       372.19      1301.77 o
  -6   12   14      2714.27      1038.02      3249.00 o
  -3   12   14       571.97       143.20      1190.94 o
  -2   12   14       748.40       179.81      1149.21 o
  -1   12   14      1607.14       295.22      2543.18 o
   1   12   14       882.93       325.16      2400.02 o
   2   12   14       627.57       148.27      1100.25 o
  -6   13   14      1496.01       580.30      1996.30 o
  -5   13   14       570.32       212.84       789.05 o
  -1   13   14      4413.07       445.76      5979.93 o
   1   13   14      5453.32       414.21      6151.26 o
   4   13   14      1501.34       278.67      1808.80 o
   5   13   14       809.86       332.96       860.25 o
  -2   14   14       714.90       310.06       838.10 o
  -1   14   14       297.22       135.85       535.00 o
   4   14   14      1132.61       500.29      1781.68 o
   0   15   14      1869.50       732.03      2801.58 o
   1    0   15       591.05       174.01       526.24 o
   2    0   15      5095.99       537.97      4947.72 o
   4    0   15      1470.83       250.75      1167.59 o
   6    0   15      6139.42       674.07      5096.53 o
   7    0   15      1583.77       666.92      1965.15 o
   8    0   15      6376.24       629.24      6113.68 o
  10    0   15      6453.41      1155.50      6837.64 o
  -8    1   15       544.33       168.60       738.21 o
  -6    1   15      2233.87       598.52      2288.67 o
  -5    1   15      5069.00       673.74      4557.60 o
  -3    1   15      7227.22       684.55      6446.48 o
  -2    1   15      5296.90       550.98      5186.88 o
  -1    1   15      7745.20       772.25      6783.17 o
   0    1   15      5281.89       555.20      4625.36 o
   1    1   15      6940.50       610.63      6372.83 o
   2    1   15      6215.15       507.30      5671.60 o
   3    1   15      6977.82       666.88      6323.43 o
   4    1   15       801.07       181.15       650.76 o
   5    1   15      4846.11       644.39      4737.57 o
  -9    2   15      5229.50       649.49      5350.92 o
  -8    2   15       592.73       244.63       878.53 o
  -7    2   15      4107.65      1682.76      4572.46 o
  -5    2   15      2616.56       464.70      2887.99 o
  -4    2   15       992.47       264.51       837.52 o
  -3    2   15      3616.06       525.60      3699.07 o
  -1    2   15       719.50       236.30       789.05 o
   1    2   15      1040.74       276.42       925.98 o
   3    2   15      3583.03       411.96      3441.00 o
   4    2   15      1041.85       251.02       935.14 o
   5    2   15      3605.72       518.65      3329.29 o
   6    2   15      2653.66      1076.00      2917.08 o
   9    2   15      4383.40       927.26      5188.32 o
  -5    3   15      2229.00       651.48      1873.16 o
  -4    3   15      6553.31       584.99      5936.70 o
  -2    3   15     13668.48       957.50     12073.61 o
  -1    3   15      2111.98       305.21      2476.06 o
   0    3   15      5249.43       461.24      4571.11 o
   1    3   15      1813.39       281.35      2137.21 o
   2    3   15     13288.96       991.71     11990.25 o
   4    3   15      7513.77       683.07      6616.20 o
   5    3   15      1912.90       391.31      1559.46 o
 -10    4   15      1611.28       440.63      1644.30 o
  -9    4   15      1947.67       437.37      2324.20 o
  -8    4   15      3497.04      1475.33      3573.65 o
  -7    4   15      2217.64       933.40      2190.24 o
  -6    4   15      6772.39       744.78      5107.96 o
  -5    4   15      6631.54       515.62      5967.56 o
  -4    4   15      2172.50       506.84      2322.28 o
  -3    4   15      2799.18       669.98      2639.90 o
   0    4   15       702.07       235.24       839.84 o
   3    4   15      2452.01       352.72      2322.28 o
   4    4   15      2579.73       428.21      2471.08 o
   5    4   15      5872.75       698.82      5833.90 o
   6    4   15      4154.10      1909.60      4928.04 o
   7    4   15      1683.91       547.89      2217.47 o
   8    4   15      2274.72       956.83      3360.52 o
   9    4   15      1281.99       409.05      2118.76 o
  10    4   15      1012.08       370.02      1554.72 o
  11    4   15       988.14       338.57      1561.04 o
 -11    5   15       583.55       197.84       261.47 o
  -9    5   15       472.22       198.91       668.22 o
  -8    5   15       764.49       320.64       734.95 o
  -5    5   15      3444.33       825.99      3155.07 o
  -4    5   15      2027.44       458.63      2188.37 o
  -3    5   15      6874.72       507.86      6014.00 o
  -1    5   15      9092.31       669.37      8429.08 o
   1    5   15      8971.31       687.72      8004.88 o
   3    5   15      5904.44       531.48      5811.01 o
   4    5   15      2209.54       546.72      2291.54 o
   5    5   15      4229.85       469.98      3638.50 o
   9    5   15       367.38       155.00       699.07 o
 -10    6   15      4762.63      1415.37      4834.42 o
  -9    6   15      1296.82       258.99      1090.98 o
  -8    6   15      5037.20      1257.77      5296.93 o
  -7    6   15      3128.78       406.14      2399.04 o
  -6    6   15      1725.11       428.78      1728.90 o
  -4    6   15      4786.41       823.72      4538.72 o
  -2    6   15      1514.70       387.05      1586.43 o
   0    6   15       468.49       187.69       535.92 o
   2    6   15      2113.56       302.16      1661.38 o
   4    6   15      4381.13       546.64      4287.63 o
   6    6   15      1129.13       515.71      1753.10 o
   8    6   15      4630.57      1264.48      5282.38 o
  10    6   15      3316.29      1064.15      4527.94 o
  -8    7   15       729.69       193.35       828.29 o
  -4    7   15      1703.73       389.18      1621.67 o
  -3    7   15       594.40       184.57       659.98 o
  -2    7   15      5219.55       954.66      4928.04 o
  -1    7   15      1690.97       601.39      1936.88 o
   0    7   15     10242.16       863.67      9291.03 o
   1    7   15      1493.35       453.46      2022.30 o
   2    7   15      4583.85      1043.74      4595.48 o
   3    7   15       799.13       244.16       810.54 o
   4    7   15      1763.91       258.70      1716.44 o
  -9    8   15      5279.39      1142.64      4641.70 o
  -7    8   15      6561.67       635.54      6077.76 o
  -6    8   15      1104.98       247.08       917.48 o
  -5    8   15      1269.70       413.22      2022.30 o
  -3    8   15      2196.62       269.34      2435.42 o
   3    8   15      2590.23       281.97      2741.57 o
   5    8   15      1665.60       563.16      2118.76 o
  -7    9   15       815.75       346.94       866.71 o
  -5    9   15      1055.23       249.27       782.88 o
  -4    9   15      3304.41       716.07      4470.26 o
  -3    9   15       713.06       150.70       751.86 o
  -2    9   15      7799.81       647.32      7756.32 o
  -1    9   15      5799.15       398.31      5418.43 o
   0    9   15      3969.89       771.86      4958.98 o
   1    9   15      4988.47       435.05      5251.90 o
   2    9   15      7448.29       662.27      7860.60 o
   3    9   15       888.05       183.56       778.41 o
   4    9   15      3456.46      1047.96      4658.06 o
   5    9   15       431.28       155.79       789.61 o
   6    9   15       334.51       155.45       594.87 o
  -8   10   15      2571.00      1024.21      3122.57 o
  -7   10   15       923.26       291.72      1116.90 o
  -6   10   15      9780.81       932.48      8343.00 o
  -4   10   15      1534.86       690.25      3043.73 o
  -3   10   15       739.95       142.28       895.80 o
   1   10   15       297.81       105.11       226.50 o
   2   10   15       333.25       137.57       458.39 o
   3   10   15       786.53       175.64       929.64 o
   4   10   15      1967.47       772.33      3228.51 o
   6   10   15      8932.24      1047.22      8708.62 o
  -6   11   15       401.78       179.34       529.92 o
  -4   11   15       940.06       296.47      1295.28 o
  -3   11   15      2005.81       574.85      2845.16 o
  -2   11   15       614.71       130.53       651.78 o
  -1   11   15      3643.01       652.17      4288.94 o
   1   11   15      3768.70       699.24      4648.51 o
   3   11   15      2317.59       742.16      3101.38 o
  -2   12   15       702.07       192.39      1174.43 o
   2   12   15       496.46       187.08      1351.30 o
   3   12   15       461.81       201.14       256.96 o
  -1   13   15       398.34       142.17       539.17 o
   0   13   15      3138.41       564.84      5139.46 o
   0    0   16     18195.90      1889.22     16101.07 o
   2    0   16      2732.23       356.14      2507.00 o
   3    0   16      3004.92       407.45      2894.44 o
   4    0   16      1068.68       355.48      1305.38 o
   8    0   16      1209.13       492.99      2015.11 o
   9    0   16      3680.49      1361.14      4970.25 o
 -10    1   16      2038.30       678.92      2523.05 o
  -9    1   16      1188.88       365.44      1719.76 o
  -4    1   16      1439.32       456.93      1496.92 o
  -3    1   16       981.66       343.93      1211.74 o
  -2    1   16      5123.04       918.70      4651.24 o
  -1    1   16      2355.85       771.64      2829.18 o
   0    1   16      4858.09       479.69      4151.22 o
   1    1   16      3001.15       392.11      2663.59 o
   2    1   16      5496.60       670.97      4718.32 o
   3    1   16      1362.06       246.38      1321.32 o
   4    1   16      1325.48       409.67      1473.79 o
  -8    2   16       856.54       261.85      1411.50 o
  -5    2   16      1477.43       431.19      1229.20 o
  -4    2   16      4087.83      1346.48      4195.15 o
  -3    2   16      2708.89       682.37      2772.02 o
  -2    2   16      1641.81       666.48      2135.36 o
  -1    2   16      1791.48       623.38      2322.28 o
   1    2   16      2555.32       323.55      2349.34 o
   2    2   16      1567.38       306.53      1782.53 o
   3    2   16      3084.67       452.95      2627.59 o
   4    2   16      5833.26       538.78      4777.57 o
  -9    3   16       565.40       229.92       814.53 o
  -6    3   16      7866.81      2270.77      7570.74 o
  -4    3   16      3088.49       956.19      3396.56 o
  -3    3   16      3029.49       964.06      3017.30 o
  -1    3   16      1772.59       520.12      2466.12 o
   1    3   16      2543.16       327.98      2242.97 o
   2    3   16       554.82       191.29       548.96 o
   3    3   16      2950.47       401.87      2793.12 o
   4    3   16      2941.13       906.97      3199.03 o
   5    3   16      1921.94       825.20      2134.44 o
   6    3   16      7433.44      2026.36      7145.32 o
 -10    4   16       556.44       219.98       547.09 o
  -9    4   16       928.49       250.60      1004.26 o
  -4    4   16      3632.63       416.88      3102.49 o
  -3    4   16      2965.44       805.77      3383.75 o
  -2    4   16      2982.33       482.96      2987.72 o
  -1    4   16      1984.29       531.90      1922.82 o
   0    4   16       964.49       271.45       757.90 o
   1    4   16      2143.72       371.23      1873.16 o
   2    4   16      3169.33       404.88      2836.63 o
   3    4   16      3775.04       456.68      3614.41 o
   4    4   16      3132.63       924.48      3459.79 o
   9    4   16       518.94       229.68       979.06 o
  -9    5   16      3086.58       600.30      2801.58 o
  -5    5   16      4390.24      1409.07      4052.60 o
  -4    5   16      1683.91       433.51      1776.62 o
  -3    5   16      1144.22       271.21      1237.63 o
  -2    5   16      2937.40       546.45      2825.99 o
   0    5   16      1444.55       383.21      1553.94 o
   2    5   16      3059.87       445.42      2716.49 o
   3    5   16      1295.58       250.20      1146.50 o
   5    5   16      4043.95      1269.20      4325.69 o
   7    5   16      3290.58      1267.28      3800.72 o
   9    5   16      1664.20       533.44      2939.81 o
  -9    6   16      2145.32       310.80      1890.51 o
  -7    6   16      1046.30       384.02      1029.77 o
  -5    6   16       813.79       341.61       474.37 o
  -4    6   16       304.98       138.22       424.77 o
  -3    6   16      2224.13       366.77      2063.88 o
  -2    6   16      3603.66       822.16      3567.67 o
  -1    6   16      1712.27       448.54      1848.14 o
   0    6   16      6857.61      1239.59      6549.66 o
   1    6   16      1369.69       366.78      1599.20 o
   2    6   16      4272.48       479.09      3657.83 o
   3    6   16      2302.71       422.73      2034.01 o
   5    6   16       556.44       246.76       650.25 o
   7    6   16       875.79       308.56      1121.58 o
   9    6   16       767.35       227.82      1601.60 o
  -9    7   16       852.52       261.23       783.44 o
  -8    7   16      2203.08       340.80      2109.56 o
  -7    7   16       913.87       325.60       785.12 o
  -4    7   16      1020.86       270.47      1075.84 o
  -3    7   16      1480.08       349.50      1485.33 o
  -2    7   16       962.35       229.51      1130.98 o
  -1    7   16      4247.77      1004.75      4247.13 o
   0    7   16       490.34       190.50       502.66 o
   1    7   16      4234.33      1110.64      4333.59 o
   2    7   16      1668.41       278.30      1327.14 o
   3    7   16       978.43       274.48      1510.10 o
   8    7   16      1081.09       410.71      2222.18 o
  -8    8   16      1235.60       413.68      1473.79 o
  -7    8   16       953.83       337.96       489.29 o
  -6    8   16       719.50       312.91       849.14 o
  -5    8   16      1103.84       506.47      1063.41 o
  -4    8   16       748.40       223.11       997.93 o
  -3    8   16      2967.31       579.22      3259.27 o
  -1    8   16      6264.08       629.13      6340.94 o
   0    8   16       494.92       161.53       723.07 o
   1    8   16      6494.94       465.91      6255.23 o
   3    8   16      2499.96       905.01      3613.21 o
   4    8   16       446.41       194.85       925.38 o
   5    8   16       632.76       233.71      1162.13 o
   6    8   16       540.32       198.37       823.69 o
   7    8   16       537.13       232.08       586.12 o
  -5    9   16      1295.58       527.65      1131.65 o
  -4    9   16       678.57       147.01       815.10 o
  -3    9   16      2263.25       422.36      2487.02 o
  -2    9   16      1046.30       180.32      1246.09 o
  -1    9   16       538.72       138.97       859.08 o
   0    9   16       873.75       201.40      1320.60 o
   1    9   16       507.25       197.63       867.89 o
   2    9   16      1267.25       279.30      1355.71 o
   6    9   16      1449.79       563.41      2995.37 o
  -4   10   16      6021.36       568.76      5811.01 o
  -3   10   16       537.92       176.38       874.98 o
  -2   10   16      3040.87       571.17      3369.80 o
  -1   10   16       362.12       123.76       489.29 o
   0   10   16      2242.01       451.34      2746.81 o
   4   10   16      4374.30       832.98      5538.34 o
   7   10   16      2527.56       859.82      1740.56 o
  -4   11   16       844.50       191.00      1340.29 o
  -2   11   16      1868.02       370.33      2204.30 o
  -1   11   16       386.75       131.29       547.09 o
   1   11   16       368.70       137.44       517.56 o
   2   11   16      1291.87       431.65      2249.60 o
  -1   12   16       456.65       167.66       962.24 o
   0   12   16      2340.84       274.71      3346.62 o
   1   12   16       868.67       226.17      1073.87 o
   1    0   17     14834.92      1244.80     12850.49 o
   3    0   17      2782.82       963.91      3123.69 o
  -4    1   17      3798.33      1041.31      3721.00 o
  -3    1   17      1093.57       266.28      1085.04 o
  -1    1   17      1269.70       285.70      1054.30 o
   1    1   17      1188.88       323.92      1112.22 o
   2    1   17       575.26       206.34       596.82 o
   3    1   17       939.01       339.54       932.69 o
   4    1   17      3980.73       855.42      3528.36 o
  -4    2   17      2217.64       450.50      2401.98 o
  -3    2   17      2330.86       696.10      2391.21 o
  -2    2   17      6972.07      1278.62      6112.11 o
  -1    2   17       853.53       326.73      1098.26 o
   0    2   17      6871.87       681.77      5683.65 o
   1    2   17      1570.11       284.98      1135.02 o
   2    2   17      6376.24       681.45      5458.25 o
   3    2   17      2872.48       422.34      2345.46 o
  -9    3   17      2201.46       925.15      2732.15 o
  -7    3   17      8632.35      1208.53      7106.49 o
  -4    3   17       520.51       219.04       655.87 o
  -3    3   17       550.77       256.00       525.33 o
   0    3   17       558.06       224.36       509.86 o
   3    3   17       677.67       206.93       541.03 o
   5    3   17      7648.59      2266.14      7478.79 o
   7    3   17      6732.80      2086.62      6947.22 o
   9    3   17      1637.63       625.25      2850.49 o
  -5    4   17      1158.23       339.62       868.48 o
  -4    4   17      1419.81       484.94      1672.81 o
  -3    4   17      5545.18      1224.86      5196.97 o
  -2    4   17      3057.97       945.74      3401.22 o
  -1    4   17      1455.03       498.79      1597.60 o
   0    4   17      2287.87       622.17      2393.17 o
   1    4   17      1620.96       314.49      1545.28 o
   2    4   17      3360.03       464.76      3134.88 o
   3    4   17      5132.90      1274.60      5217.17 o
   5    4   17       725.05       320.60       856.15 o
  -6    5   17      8075.72       896.79      6102.73 o
  -4    5   17      3653.40      1081.57      3711.25 o
  -2    5   17       805.95       302.84       884.47 o
   0    5   17      1521.40       575.81      1450.85 o
   2    5   17       874.77       241.21       713.96 o
   6    5   17      6150.21      1797.30      6340.94 o
  -5    6   17       831.55       294.71       882.68 o
  -4    6   17      1423.70       323.30      1386.82 o
  -3    6   17      1273.38       361.02      1437.93 o
  -2    6   17      1201.96       295.87      1234.82 o
  -1    6   17      5239.46      1352.52      5075.14 o
   0    6   17       854.53       284.68       834.05 o
   1    6   17      5491.50       742.06      4886.01 o
   2    6   17      1373.51       492.27      1480.71 o
   4    6   17      1193.63       386.38      1579.27 o
   5    6   17       724.13       300.95       877.94 o
   6    6   17       637.09       275.33       732.78 o
  -4    7   17       977.35       365.77      1167.59 o
  -3    7   17      1461.60       351.26      1737.22 o
  -2    7   17       658.11       197.74       603.19 o
   0    7   17       598.61       190.27       526.70 o
   1    7   17       662.53       209.92       528.08 o
   7    7   17       805.95       332.15      1527.25 o
  -4    8   17      1719.39       489.42      2575.56 o
  -2    8   17      6977.82       744.49      6684.70 o
  -1    8   17       342.74       126.78       568.35 o
   0    8   17      6812.10       607.79      6663.46 o
   2    8   17      5915.02      1513.82      6564.24 o
  -4    9   17       997.90       330.46      1186.11 o
  -3    9   17       382.03       159.40       466.13 o
  -2    9   17       494.16       133.87       519.84 o
   0    9   17       425.58       145.53       597.31 o
   5    9   17      1920.43       782.65      3149.45 o
  -4   10   17       574.44       163.30       427.66 o
  -3   10   17      6461.70      1206.04      6582.08 o
  -2   10   17       600.29       151.76       732.24 o
  -1   10   17      2903.92       650.88      4305.98 o
   0   10   17       458.86       148.90       418.61 o
   1   10   17      2634.19      1026.13      4378.47 o
   3   10   17      5609.43       548.96      6676.52 o
   5   10   17      2946.73      1016.18      2955.01 o
  -1   11   17       463.29       170.36       368.64 o
   1   11   17       482.75       213.97       391.64 o
   0    0   18      8078.81      1067.07      7123.36 o
   2    0   18      1903.88       424.92      1648.36 o
   4    0   18       810.84       315.52       953.57 o
   5    0   18      7279.97       904.31      5394.90 o
  -3    1   18      1725.11       531.68      1758.96 o
  -2    1   18      2734.03       502.00      2399.04 o
  -1    1   18       896.27       320.39       717.17 o
   0    1   18      4954.51       663.67      3873.82 o
   1    1   18      1041.85       262.13       742.56 o
   2    1   18      3130.71       429.37      2288.67 o
   3    1   18      1835.44       470.29      1542.13 o
   4    1   18      2678.53       911.84      2623.49 o
   5    1   18      1560.58       636.19      1685.92 o
  -2    2   18      1236.81       423.57      1197.85 o
  -1    2   18      2350.84       443.81      1935.12 o
   1    2   18      2222.50       377.99      1711.48 o
   2    2   18      1497.34       320.91      1105.56 o
   3    2   18      2905.78       391.39      2453.22 o
   4    2   18      3107.64       500.68      2372.66 o
  -7    3   18       739.02       342.38       953.57 o
  -1    3   18      6783.72       654.71      5478.96 o
   1    3   18      5965.41       871.76      5550.25 o
   3    3   18      1932.52       343.39      1546.85 o
   4    3   18      2159.69       492.55      1921.07 o
  -4    4   18      2195.01       889.93      2536.13 o
  -3    4   18      1592.00       726.32      2203.36 o
   1    4   18      1753.81       273.81      1191.63 o
   2    4   18      1722.25       375.58      1674.45 o
   3    4   18      2822.90       385.77      2345.46 o
   4    4   18      2520.65       976.12      2578.61 o
   2    5   18      3128.78       775.70      2762.55 o
   3    5   18      2083.61       425.67      1778.31 o
   7    5   18      2266.52       887.93      2736.34 o
  -5    6   18      3077.03       773.07      2761.50 o
  -2    6   18      1020.86       435.39      1335.17 o
   2    6   18      1294.34       433.30      1513.99 o
   3    6   18       920.12       372.64       952.96 o
   5    6   18      2518.92      1027.60      2983.34 o
  -4    7   18      1348.12       404.31      1299.60 o
  -3    7   18      2386.01       810.18      3408.22 o
  -2    7   18      1146.55       294.79      1362.35 o
   1    7   18       978.43       318.61      1017.61 o
   2    7   18       919.08       292.10      1214.52 o
   4    7   18       878.84       368.27      1362.35 o
  -3    8   18      1390.14       370.79      1645.11 o
  -1    8   18      2143.72       681.91      2839.82 o
   3    8   18      1207.94       517.86      1440.96 o
  -3    9   18       700.25       221.28       956.05 o
  -2    9   18       459.60       194.76       711.82 o
  -1    9   18      2419.75       453.65      3026.10 o
   0    9   18       618.98       188.35       948.02 o
   1    9   18      1810.46       632.53      2721.71 o
   4    0   19      2211.16       697.41      1893.99 o
  -3    1   19      1769.70       654.32      2039.43 o
  -2    1   19      1929.49       414.16      1490.73 o
  -1    1   19      6212.44       653.66      4487.66 o
   1    1   19      4952.08       697.41      4155.09 o
   2    1   19      1755.25       400.79      1432.62 o
   3    1   19      2453.72       444.89      1900.96 o
  -1    2   19       664.30       274.06       505.80 o
   1    2   19       659.87       298.78       559.32 o
   2    2   19      2102.50       359.75      1173.06 o
   3    2   19      1020.86       319.95       952.96 o
   4    2   19       643.19       252.21       487.08 o
   5    2   19      2737.63      1026.27      2844.09 o
  -2    3   19      4502.67      1207.64      4245.83 o
   0    3   19     11174.90      1214.98      8458.48 o
   2    3   19      4600.18       788.87      4385.09 o
   4    3   19      1625.12       378.71      1202.70 o
  -5    4   19      1585.14       531.58      1219.41 o
  -1    4   19       626.71       278.25       787.36 o
   2    4   19      1636.24       325.72      1264.51 o
   3    4   19      1262.35       333.78      1021.44 o
   4    4   19      1905.38       399.55      1646.74 o
   1    5   19      4367.47      1209.84      4182.21 o
   3    5   19      3724.46       514.52      3576.04 o
   4    5   19       633.62       287.58       676.52 o
   1    7   19      1253.81       565.37      1553.94 o
   2    7   19      2375.93       691.06      2707.12 o
   2    0   20      2916.92       529.67      2381.44 o
   4    0   20      2450.31       812.51      2242.02 o
  -3    1   20      1310.49       472.12      1564.99 o
  -2    1   20      1417.22       408.06      1312.61 o
   2    1   20      1962.89       408.59      1340.29 o
   3    1   20      1995.04       458.03      1521.78 o
   4    1   20      1505.34       423.23      1372.70 o
  -1    2   20      2433.31       510.93      2415.72 o
   0    2   20      1766.80       425.25      1150.57 o
   1    2   20      3077.03       643.27      2770.97 o
   3    2   20      2446.90       415.34      1941.28 o
  -2    3   20       743.70       327.51       632.52 o
  -1    3   20      3352.06       944.35      3316.61 o
   1    3   20      3760.25       548.63      3047.04 o
   3    3   20       857.55       277.12       754.05 o
  -1    4   20      1167.62       344.52       936.36 o
   1    4   20       952.77       373.88      1020.80 o
   2    4   20      1689.56       383.32      1369.00 o
   0    5   20      3828.08      1392.42      3594.00 o
